# Supplementary material
Source: ML conference proceedings conference paper supplement (https://proceedings.neurips.cc/paper_files/paper/2019/hash/85f007f8c50dd25f5a45fca73cad64bd-Abstract.html)
Supplement: Supplementary file 6 [file Classifiers.xls]

## Sheet: 0
		0	1	2	3	4	5	6	7	8	9	10	11	12	13	14	15	16	17	18	19	20	21	22	23	24	25	26	27	28	29	30	31	32	33	34	35	36	37	38	39	40	41	42	43	44	45	46	47
-0.853154	-0.521659	1	0	0	0	0	0	0	0	0	0	0	0	1	0	1	0	1	1	0	0	1	0	0	0	1	1	0	0	0	0	1	1	0	0	0	1	0	0	0	0	0	0	1	0	1	0	1	0
-0.993395	0.114744	1	1	0	1	1	0	1	1	1	1	1	1	1	1	1	1	1	1	1	1	1	0	1	0	1	1	1	1	1	1	1	1	1	1	1	1	1	1	1	1	1	1	1	1	1	1	1	1
-0.775656	0.631156	1	1	0	0	0	0	1	0	0	0	0	0	1	0	1	1	1	0	0	0	0	0	0	0	0	0	1	1	0	1	1	1	1	0	0	1	0	0	0	1	1	1	1	1	0	0	1	1
0.892825	0.450404	0	1	1	1	1	1	0	0	0	1	1	0	0	1	0	0	0	0	1	1	0	1	1	1	0	0	0	0	1	0	0	0	0	0	1	0	1	0	0	0	0	1	0	0	0	1	0	0
0.661753	-0.749722	0	0	1	1	1	1	0	1	0	0	0	0	0	1	0	0	0	1	0	0	0	1	1	0	0	1	0	0	0	0	0	0	0	1	0	0	0	1	0	0	0	0	0	0	0	1	0	0
0.755804	-0.654798	0	0	1	1	1	1	0	1	1	1	1	1	0	1	0	0	1	1	1	1	1	1	1	1	1	1	0	0	1	0	0	1	0	1	1	0	1	1	1	0	1	0	0	0	1	1	0	0
-0.925281	-0.379283	1	0	0	0	0	0	1	1	1	0	0	1	1	0	1	1	1	1	0	0	1	0	0	0	1	1	1	1	0	1	1	1	1	0	0	1	0	1	1	1	1	0	1	1	1	0	1	1
-0.609215	-0.793005	1	0	0	1	0	0	0	1	1	0	0	1	1	1	1	0	1	1	0	0	1	1	1	0	1	1	0	0	0	0	1	1	0	1	0	1	0	1	1	0	1	0	1	0	1	1	1	1
-0.743892	-0.6683	1	0	0	1	0	0	1	1	1	0	0	1	1	1	1	0	1	1	0	0	1	0	0	0	1	1	0	1	0	1	1	1	1	1	0	1	0	1	1	1	1	0	1	0	1	0	1	1
0.998313	-0.0580601	0	0	1	1	1	1	0	0	0	0	0	0	0	1	0	0	0	0	0	0	0	1	1	1	0	0	0	0	0	0	0	0	0	0	0	0	0	0	0	0	0	0	0	0	0	0	0	0
-0.797942	-0.602734	1	0	0	0	0	0	1	1	1	0	0	1	1	1	1	0	1	1	0	0	1	0	0	0	1	1	0	1	0	1	1	1	1	1	0	1	0	1	1	1	1	0	1	0	1	0	1	1
0.1061	-0.994355	0	0	1	1	1	1	0	1	1	1	0	1	1	1	1	0	1	1	1	0	1	1	1	1	1	1	0	0	1	0	1	1	0	1	0	1	0	1	1	0	1	0	1	0	1	1	1	1
-0.881188	0.472766	1	0	0	0	0	0	1	0	0	0	0	0	1	0	1	1	1	0	0	0	0	0	0	0	0	0	1	1	0	1	1	1	1	0	0	1	0	0	0	1	0	0	1	1	0	0	1	1
0.730505	-0.682907	0	1	1	1	1	1	0	1	1	1	1	1	0	1	0	0	1	1	1	1	1	1	1	1	1	1	0	0	1	0	0	1	0	1	1	0	1	1	1	0	1	0	0	0	1	1	0	1
0.839147	0.543904	0	1	1	1	1	1	0	0	0	1	1	0	0	1	0	1	0	0	1	1	0	1	1	1	0	0	1	0	1	0	0	0	0	0	1	0	1	0	0	0	0	1	0	1	0	1	0	0
0.949548	0.313622	0	1	1	0	1	1	0	0	0	0	0	0	0	0	0	0	0	0	0	1	0	1	1	1	0	0	0	0	0	0	0	0	0	0	0	0	1	0	0	0	0	0	0	0	0	0	0	0
0.885481	0.464676	0	1	1	1	1	1	1	1	1	1	1	1	0	1	0	1	0	0	1	1	0	1	1	1	0	0	1	1	1	1	0	0	1	1	1	0	1	1	1	1	1	1	0	1	0	1	0	1
0.999592	0.0285473	0	1	1	1	1	1	0	1	0	1	1	0	0	1	0	0	0	0	1	1	0	1	1	1	0	0	0	0	1	0	0	0	0	1	0	0	1	1	0	0	0	1	0	0	0	1	0	0
-0.65339	0.757021	1	1	0	0	0	0	1	0	0	0	1	0	1	0	1	1	1	0	0	1	0	0	0	0	0	0	1	1	0	1	1	1	1	0	1	1	1	0	0	1	1	1	1	1	0	0	1	1
0.554947	0.831886	0	1	0	0	0	1	0	0	0	0	1	0	0	0	0	1	0	0	0	1	0	0	0	1	0	0	0	0	0	0	0	0	0	0	0	0	1	0	0	0	0	1	0	0	0	0	0	0
-0.652795	-0.757535	1	0	0	1	0	0	0	1	1	0	0	1	1	1	1	0	1	1	0	0	1	0	0	0	1	1	0	0	0	0	1	1	0	1	0	1	0	1	1	0	1	0	1	0	1	0	1	1
0.961308	0.275477	0	1	1	1	1	1	0	0	0	1	0	0	0	1	0	0	0	0	1	1	0	1	1	1	0	0	0	0	1	0	0	0	0	0	0	0	1	0	0	0	0	1	0	0	0	1	0	0
0.917184	-0.398464	0	1	1	1	1	1	0	1	1	1	1	1	0	1	0	0	0	1	1	1	1	1	1	1	1	1	1	0	1	0	0	0	0	1	1	0	1	1	1	0	1	1	0	1	1	1	0	1
0.863298	-0.504695	0	1	1	1	1	1	0	1	1	1	1	1	0	1	0	0	1	1	1	1	1	1	1	1	1	1	1	0	1	0	0	0	0	1	1	0	1	1	1	0	1	1	0	1	1	1	0	1
-0.481276	0.876569	1	1	0	0	0	1	1	0	1	1	1	0	1	0	1	1	1	0	1	1	1	0	0	1	1	0	1	1	1	1	1	1	1	0	1	1	1	0	1	1	1	1	1	1	0	0	1	1
-0.732846	-0.680395	1	0	0	1	0	0	1	1	1	1	0	1	1	1	1	0	1	1	0	0	1	1	1	0	1	1	1	1	0	1	1	1	1	1	0	1	0	1	1	1	1	0	1	1	1	1	1	1
-0.189704	0.981841	1	1	0	0	0	1	1	0	0	0	1	0	1	0	1	1	1	0	1	1	0	0	0	1	0	0	1	1	1	1	0	0	1	0	1	1	1	0	0	1	1	1	1	1	0	0	0	1
-0.945188	-0.326526	1	0	0	0	0	0	1	0	0	0	0	0	1	0	1	0	1	1	0	0	1	0	0	0	1	1	0	1	0	1	1	1	1	0	0	1	0	0	0	1	1	0	1	0	1	0	1	1
0.991422	0.130697	0	1	1	1	1	1	1	1	1	1	1	1	0	1	0	1	0	1	1	1	0	1	1	1	0	1	1	0	1	0	0	0	0	1	1	0	1	1	1	0	1	1	0	1	0	1	0	1
0.817048	0.576569	1	1	1	1	1	1	1	1	1	1	1	1	1	1	0	1	0	0	1	1	0	1	1	1	0	0	1	1	1	1	0	0	1	1	1	0	1	1	1	1	1	1	0	1	0	1	0	1
-0.939848	0.341594	1	0	0	0	0	0	1	0	0	0	0	0	1	0	1	1	0	0	0	0	0	0	0	0	0	0	0	1	0	1	1	1	1	0	0	1	0	0	0	1	0	0	1	0	0	0	1	0
-0.971666	0.236359	1	1	0	0	0	0	1	0	1	0	1	1	1	0	1	1	1	0	0	0	1	0	0	0	1	1	1	1	0	1	1	1	1	0	1	1	0	0	1	1	1	1	1	1	1	0	1	1
-0.19481	-0.980841	1	0	1	1	1	1	1	1	1	1	1	1	1	1	1	0	1	1	1	0	1	1	1	1	1	1	1	1	1	1	1	1	1	1	1	1	0	1	1	1	1	1	1	1	1	1	1	1
-0.466026	0.884771	1	1	0	0	0	0	1	0	0	0	1	0	1	0	1	1	1	0	0	1	0	0	0	0	0	0	1	1	0	1	1	0	1	0	1	1	1	0	0	1	1	1	1	1	0	0	1	1
0.722347	0.691531	0	1	0	0	0	1	0	0	0	0	1	0	0	0	0	1	0	0	1	1	0	0	0	1	0	0	0	0	1	0	0	0	0	0	0	0	1	0	0	0	0	1	0	0	0	0	0	0
0.536252	-0.844058	0	0	1	1	1	1	0	1	0	1	0	1	0	1	0	0	0	1	0	0	1	1	1	1	1	1	0	0	0	0	0	0	0	1	0	0	0	1	1	0	0	0	0	0	1	1	0	0
-0.917198	-0.398431	0	0	0	0	0	0	0	0	0	0	0	0	0	0	0	0	0	0	0	0	0	0	0	0	0	0	0	0	0	0	1	1	0	0	0	1	0	0	0	0	0	0	1	0	1	0	1	0
0.921798	-0.38767	0	1	1	1	1	1	1	1	1	1	1	1	0	1	0	0	1	1	1	1	1	1	1	1	1	1	1	0	1	0	0	0	0	1	1	0	1	1	1	0	1	1	0	1	1	1	0	1
-0.853389	-0.521275	1	0	0	0	0	0	0	0	0	0	0	1	1	0	1	0	1	1	0	0	1	0	0	0	1	1	0	1	0	0	1	1	1	0	0	1	0	1	0	0	1	0	1	0	1	0	1	1
0.953113	-0.302616	0	0	1	1	1	1	0	1	0	1	0	0	0	1	0	0	0	1	1	0	0	1	1	1	0	0	0	0	1	0	0	0	0	1	0	0	1	1	0	0	0	0	0	0	0	1	0	0
0.666456	-0.745545	1	1	1	1	1	1	1	1	1	1	1	1	1	1	1	0	1	1	1	1	1	1	1	1	1	1	1	0	1	1	1	1	0	1	1	1	1	1	1	1	1	1	1	1	1	1	1	1
0.984874	0.17327	0	0	1	0	1	1	0	0	0	0	0	0	0	0	0	0	0	0	0	0	0	0	0	1	0	0	0	0	0	0	0	0	0	0	0	0	1	0	0	0	0	0	0	0	0	0	0	0
-0.494477	0.869191	0	0	0	0	0	0	0	0	0	0	0	0	0	0	0	1	0	0	0	0	0	0	0	0	0	0	0	1	0	1	0	0	1	0	0	0	0	0	0	1	0	0	0	0	0	0	0	0
0.981048	-0.193765	0	0	1	1	1	1	0	1	0	1	0	0	0	1	0	0	0	0	1	1	0	1	1	1	0	0	0	0	1	0	0	0	0	1	0	0	1	1	0	0	0	0	0	0	0	1	0	0
-0.410173	0.912008	1	1	0	0	0	0	0	0	0	0	0	0	0	0	0	1	0	0	0	1	0	0	0	0	0	0	1	1	0	1	0	0	1	0	0	0	1	0	0	1	0	1	0	1	0	0	0	0
-0.674188	0.73856	1	1	0	0	0	0	1	0	0	0	1	0	1	0	1	1	1	0	0	1	0	0	0	0	0	0	1	1	0	1	1	1	1	0	1	1	1	0	0	1	1	1	1	1	0	0	1	1
0.316914	-0.948454	0	0	0	0	0	0	0	0	0	0	0	0	0	1	0	0	0	1	0	0	0	1	0	0	0	1	0	0	0	0	0	0	0	0	0	0	0	1	0	0	0	0	0	0	0	0	0	0
0.575159	-0.818042	0	0	1	1	1	1	0	1	0	1	0	1	0	1	0	0	0	1	0	0	0	1	1	1	0	1	0	0	0	0	0	0	0	1	0	0	0	1	0	0	0	0	0	0	1	1	0	0
-0.00185062	0.999998	1	1	0	0	0	1	1	0	1	1	1	0	1	0	1	1	1	0	1	1	0	0	0	1	0	0	1	1	1	1	1	0	1	1	1	1	1	0	1	1	1	1	1	1	0	1	1	1
0.426313	0.904576	1	1	1	1	1	1	1	1	1	1	1	1	1	1	1	1	1	0	1	1	0	1	1	1	0	0	1	1	1	1	0	0	1	1	1	1	1	0	1	1	1	1	1	1	0	1	0	1
0.998237	0.0593595	0	0	1	0	0	1	0	0	0	0	0	0	0	0	0	0	0	0	0	0	0	0	0	1	0	0	0	0	0	0	0	0	0	0	0	0	0	0	0	0	0	0	0	0	0	0	0	0
-0.950924	-0.309425	1	0	0	0	0	0	1	1	1	0	0	1	1	0	1	1	1	1	0	0	1	0	0	0	1	1	1	1	0	1	1	1	1	0	0	1	0	1	1	1	1	0	1	1	1	0	1	1
-0.758847	-0.651269	0	0	0	0	0	0	0	0	0	0	0	0	0	0	0	0	0	0	0	0	0	0	0	0	0	0	0	0	0	0	0	1	0	0	0	0	0	0	0	0	0	0	0	0	1	0	0	0
0.700473	0.713679	0	1	1	0	1	1	0	0	0	1	1	0	0	0	0	1	0	0	1	1	0	1	1	1	0	0	1	0	1	0	0	0	0	0	1	0	1	0	0	0	0	1	0	1	0	1	0	0
0.280601	-0.959824	0	0	1	1	1	0	0	1	1	1	0	1	0	1	0	0	0	1	0	0	1	1	1	0	1	1	0	0	0	0	0	1	0	1	0	0	0	1	1	0	0	0	0	0	1	1	0	0
0.563585	0.826058	0	1	1	0	1	1	1	0	0	1	1	0	0	0	0	1	0	0	1	1	0	0	0	1	0	0	1	1	1	1	0	0	1	0	1	0	1	0	0	1	0	1	0	1	0	0	0	0
0.54834	0.836255	1	1	1	1	1	1	1	0	1	1	1	0	1	0	0	1	0	0	1	1	0	1	1	1	0	0	1	1	1	1	0	0	1	1	1	0	1	0	1	1	1	1	0	1	0	1	0	1
-0.890924	-0.454153	1	0	0	0	0	0	1	1	1	0	0	1	1	0	1	0	1	1	0	0	1	0	0	0	1	1	0	1	0	1	1	1	1	0	0	1	0	1	1	1	1	0	1	0	1	0	1	1
0.987384	-0.158343	0	0	1	1	1	1	0	0	0	0	0	0	0	1	0	0	0	0	0	0	0	1	1	1	0	0	0	0	0	0	0	0	0	0	0	0	0	0	0	0	0	0	0	0	0	0	0	0
0.924513	-0.381151	0	0	1	1	1	1	0	1	1	1	0	1	0	1	0	0	0	1	1	1	0	1	1	1	0	1	0	0	1	0	0	0	0	1	0	0	1	1	1	0	0	0	0	0	0	1	0	0
0.686761	0.726884	1	1	1	1	1	1	1	1	1	1	1	1	1	1	1	1	1	1	1	1	0	1	1	1	0	0	1	1	1	1	0	0	1	1	1	0	1	1	1	1	1	1	1	1	0	1	0	1
-0.295675	-0.955289	1	0	1	1	1	1	1	1	1	1	1	1	1	1	1	1	1	1	1	0	1	1	1	1	1	1	1	1	1	1	1	1	1	1	1	1	0	1	1	1	1	1	1	1	1	1	1	1
0.622068	0.782964	0	1	0	0	0	1	0	0	0	0	1	0	0	0	0	1	0	0	0	1	0	0	0	1	0	0	0	0	0	0	0	0	0	0	0	0	1	0	0	0	0	1	0	0	0	0	0	0
0.956488	0.291772	0	1	1	1	1	1	1	1	1	1	1	1	0	1	0	1	0	1	1	1	0	1	1	1	0	1	1	1	1	1	0	0	1	1	1	0	1	1	1	1	1	1	0	1	0	1	0	1
0.422506	-0.90636	0	0	1	1	1	1	0	1	1	1	0	1	0	1	0	0	0	1	1	0	1	1	1	1	1	1	0	0	1	0	0	1	0	1	0	0	0	1	1	0	0	0	0	0	1	1	0	0
0.599701	0.800224	0	1	0	0	0	1	0	0	0	0	1	0	0	0	0	1	0	0	1	1	0	0	0	1	0	0	1	0	1	0	0	0	0	0	1	0	1	0	0	0	0	1	0	1	0	0	0	0
-0.521368	0.853332	1	1	0	0	0	0	1	0	0	0	1	0	1	0	1	1	1	0	0	1	0	0	0	0	0	0	1	1	0	1	1	0	1	0	1	1	1	0	0	1	1	1	1	1	0	0	1	1
0.445241	-0.895411	0	0	1	1	1	1	0	1	1	1	0	1	0	1	0	0	0	1	1	0	1	1	1	1	1	1	0	0	1	0	0	1	0	1	0	0	0	1	1	0	0	0	0	0	1	1	1	0
-0.555545	-0.831487	1	0	1	1	1	0	1	1	1	1	1	1	1	1	1	1	1	1	1	0	1	1	1	0	1	1	1	1	1	1	1	1	1	1	1	1	0	1	1	1	1	0	1	1	1	1	1	1
-0.941828	-0.336094	0	0	0	0	0	0	0	0	0	0	0	0	0	0	1	0	0	0	0	0	1	0	0	0	1	0	0	0	0	0	1	1	0	0	0	1	0	0	0	0	0	0	1	0	1	0	1	0
-0.067343	0.99773	1	1	0	0	0	1	1	0	0	0	1	0	1	0	0	1	0	0	0	1	0	0	0	1	0	0	1	1	0	1	0	0	1	0	1	0	1	0	0	1	0	1	0	1	0	0	0	0
-0.434087	0.900871	1	1	0	0	0	0	1	0	0	0	1	0	1	0	0	1	0	0	0	1	0	0	0	0	0	0	1	1	0	1	0	0	1	0	1	0	1	0	0	1	0	1	1	1	0	0	0	0
-0.182913	-0.983129	1	0	1	1	1	0	1	1	1	1	0	1	1	1	1	0	1	1	1	0	1	1	1	0	1	1	0	0	1	1	1	1	0	1	1	1	0	1	1	1	1	0	1	0	1	1	1	1
0.29013	0.956987	1	1	0	0	0	1	1	0	1	1	1	0	1	0	0	1	1	0	1	1	0	0	0	1	0	0	1	1	1	1	0	0	1	0	1	0	1	0	1	1	1	1	0	1	0	1	0	1
0.119567	-0.992826	1	0	1	1	1	1	1	1	1	1	0	1	1	1	1	0	1	1	1	0	1	1	1	1	1	1	0	0	1	0	1	1	0	1	1	1	0	1	1	0	1	0	1	0	1	1	1	1
0.245134	0.969489	0	1	0	0	0	1	0	0	0	0	1	0	0	0	0	1	0	0	0	1	0	0	0	1	0	0	0	0	0	0	0	0	1	0	0	0	1	0	0	0	0	1	0	1	0	0	0	0
-0.990561	0.137074	1	0	0	0	0	0	0	0	0	0	0	0	1	0	1	0	0	0	0	0	0	0	0	0	0	0	0	1	0	0	1	1	1	0	0	1	0	0	0	0	0	0	1	0	1	0	1	0
0.926126	0.377214	0	1	1	0	1	1	0	0	0	0	0	0	0	0	0	0	0	0	0	1	0	0	0	1	0	0	0	0	0	0	0	0	0	0	0	0	1	0	0	0	0	0	0	0	0	0	0	0
0.87368	0.486502	1	1	1	1	1	1	1	1	1	1	1	1	1	1	1	1	1	1	1	1	1	1	1	1	1	1	1	1	1	1	0	0	1	1	1	0	1	1	1	1	1	1	0	1	0	1	0	1
-0.594773	-0.803894	0	0	0	0	0	0	0	0	0	0	0	0	0	0	0	0	0	1	0	0	1	0	0	0	1	1	0	0	0	0	1	1	0	0	0	1	0	1	0	0	0	0	1	0	1	0	1	0
-0.477192	-0.878799	1	0	1	1	1	0	0	1	1	0	0	1	1	1	1	0	1	1	0	0	1	1	1	0	1	1	0	0	0	0	1	1	0	1	0	1	0	1	1	0	1	0	1	0	1	1	1	1
0.658734	0.752376	0	1	0	0	0	1	0	0	0	0	1	0	0	0	0	1	0	0	1	1	0	0	0	1	0	0	1	0	1	0	0	0	0	0	1	0	1	0	0	0	0	1	0	1	0	0	0	0
0.655263	-0.7554	0	0	1	1	1	1	0	1	0	1	0	1	0	1	0	0	0	1	0	0	0	1	1	1	0	1	0	0	0	0	0	0	0	1	0	0	0	1	0	0	0	0	0	0	0	1	0	0
0.194143	0.980973	0	1	0	0	0	0	0	0	0	0	0	0	0	0	0	1	0	0	0	1	0	0	0	0	0	0	0	0	0	0	0	0	0	0	0	0	1	0	0	0	0	1	0	0	0	0	0	0
0.132028	-0.991246	0	0	1	1	1	0	0	1	0	0	0	1	0	1	0	0	0	1	0	0	0	1	1	0	0	1	0	0	0	0	0	0	0	0	0	0	0	1	0	0	0	0	0	0	1	0	0	0
0.859262	0.511536	1	1	1	1	1	1	1	1	1	1	1	1	1	1	0	1	0	1	1	1	0	1	1	1	0	0	1	1	1	1	0	0	1	1	1	0	1	1	1	1	1	1	0	1	0	1	0	1
0.269462	0.963011	0	1	0	0	0	0	0	0	0	0	0	0	0	0	0	1	0	0	0	1	0	0	0	0	0	0	0	0	0	0	0	0	0	0	0	0	1	0	0	0	0	1	0	0	0	0	0	0
-0.986635	-0.162947	1	1	0	1	0	0	1	1	1	1	1	1	1	1	1	1	1	1	1	1	1	0	0	0	1	1	1	1	1	1	1	1	1	1	1	1	0	1	1	1	1	1	1	1	1	1	1	1
-0.0547704	0.998499	1	1	0	0	0	1	1	0	1	1	1	0	1	0	1	1	1	0	1	1	0	0	0	1	0	0	1	1	1	1	0	0	1	0	1	1	1	0	0	1	1	1	1	1	0	0	0	1
0.119976	-0.992777	0	0	0	0	0	0	0	1	0	0	0	0	0	1	0	0	0	1	0	0	0	0	0	0	0	1	0	0	0	0	0	0	0	0	0	0	0	1	0	0	0	0	0	0	1	0	0	0
0.139839	0.990174	0	1	0	0	0	0	0	0	0	0	0	0	0	0	0	1	0	0	0	1	0	0	0	0	0	0	0	0	0	0	0	0	0	0	0	0	1	0	0	0	0	1	0	0	0	0	0	0
-0.0445126	-0.999009	1	1	1	1	1	1	1	1	1	1	1	1	1	1	1	0	1	1	1	1	1	1	1	1	1	1	1	1	1	1	1	1	1	1	1	1	1	1	1	1	1	1	1	1	1	1	1	1
0.199774	0.979842	1	1	1	1	1	1	1	1	1	1	1	1	1	1	1	1	1	1	1	1	1	1	1	1	1	0	1	1	1	1	1	1	1	1	1	1	1	1	1	1	1	1	1	1	0	1	1	1
-0.999967	-0.00809245	1	1	0	0	0	0	1	1	1	1	1	1	1	0	1	1	1	1	1	0	1	0	0	0	1	1	1	1	1	1	1	1	1	1	1	1	0	1	1	1	1	1	1	1	1	1	1	1
-0.231752	0.972775	1	1	1	0	1	1	1	0	1	1	1	1	1	0	1	1	1	0	1	1	1	0	0	1	1	0	1	1	1	1	1	1	1	1	1	1	1	0	1	1	1	1	1	1	1	1	1	1
-0.374939	-0.927049	0	0	1	1	1	0	0	1	1	0	0	1	0	1	1	0	1	1	0	0	1	1	1	0	1	1	0	0	0	0	1	1	0	1	0	1	0	1	1	0	1	0	1	0	1	1	1	0
-0.108998	0.994042	1	1	1	0	1	1	1	0	1	1	1	1	1	0	1	1	1	0	1	1	1	0	0	1	1	0	1	1	1	1	1	1	1	1	1	1	1	0	1	1	1	1	1	1	0	1	1	1
-0.562103	-0.827067	1	0	1	1	1	0	1	1	1	1	0	1	1	1	1	0	1	1	0	0	1	1	1	0	1	1	0	1	0	1	1	1	0	1	0	1	0	1	1	1	1	0	1	0	1	1	1	1
0.419673	-0.907676	0	0	1	1	1	1	0	1	1	1	0	1	0	1	0	0	1	1	1	0	1	1	1	1	1	1	0	0	1	0	1	1	0	1	0	0	0	1	1	0	0	0	0	0	1	1	1	0
0.968587	0.248675	1	1	1	1	1	1	1	1	1	1	1	1	1	1	0	1	1	1	1	1	0	1	1	1	0	1	1	1	1	1	0	0	1	1	1	0	1	1	1	1	1	1	0	1	0	1	0	1
0.362053	0.932157	1	1	1	1	1	1	1	0	1	1	1	0	1	0	1	1	1	0	1	1	0	1	1	1	0	0	1	1	1	1	0	0	1	1	1	0	1	0	1	1	1	1	1	1	0	1	0	1
0.49193	-0.870635	1	1	1	1	1	1	1	1	1	1	1	1	1	1	1	0	1	1	1	1	1	1	1	1	1	1	1	0	1	0	1	1	0	1	1	1	1	1	1	0	1	1	1	1	1	1	1	1
0.98895	-0.148251	0	0	1	1	1	1	0	0	0	0	0	0	0	1	0	0	0	0	0	0	0	1	1	1	0	0	0	0	0	0	0	0	0	0	0	0	0	0	0	0	0	0	0	0	0	0	0	0
0.979536	0.201267	0	1	1	1	1	1	1	1	1	1	1	1	0	1	0	1	0	1	1	1	0	1	1	1	0	1	1	0	1	1	0	0	0	1	1	0	1	1	1	1	1	1	0	1	0	1	0	1
0.782156	-0.623082	0	0	1	1	1	0	0	0	0	0	0	0	0	1	0	0	0	0	0	0	0	1	1	0	0	0	0	0	0	0	0	0	0	0	0	0	0	1	0	0	0	0	0	0	0	0	0	0
-0.713795	-0.700355	1	0	1	1	1	0	1	1	1	1	1	1	1	1	1	1	1	1	1	0	1	1	1	0	1	1	1	1	1	1	1	1	1	1	1	1	0	1	1	1	1	0	1	1	1	1	1	1
-0.215492	0.976506	1	1	0	0	0	1	1	0	1	1	1	0	1	0	1	1	1	0	1	1	0	0	0	1	0	0	1	1	1	1	1	0	1	0	1	1	1	0	1	1	1	1	1	1	0	0	1	1
0.983766	0.179458	0	1	1	1	1	1	0	0	0	0	0	0	0	1	0	0	0	0	0	1	0	1	1	1	0	0	0	0	1	0	0	0	0	0	0	0	1	0	0	0	0	0	0	0	0	1	0	0
-0.591537	0.806278	1	1	0	0	0	1	1	0	1	1	1	0	1	0	1	1	1	0	1	1	1	0	0	1	1	0	1	1	1	1	1	1	1	0	1	1	1	0	1	1	1	1	1	1	1	0	1	1
0.3449	0.93864	0	1	0	0	0	1	0	0	0	0	1	0	0	0	0	1	0	0	0	1	0	0	0	1	0	0	1	1	0	1	0	0	1	0	1	0	1	0	0	1	0	1	0	1	0	0	0	0
0.992578	0.121613	1	1	1	1	1	1	1	1	1	1	1	1	1	1	1	1	1	1	1	1	1	1	1	1	1	1	1	1	1	1	0	0	1	1	1	0	1	1	1	1	1	1	0	1	0	1	0	1
-0.966041	0.258388	1	1	0	0	0	0	1	1	1	1	1	1	1	0	1	1	1	1	1	1	1	0	0	0	1	1	1	1	1	1	1	1	1	1	1	1	1	1	1	1	1	1	1	1	1	1	1	1
-0.297126	0.954838	0	0	0	0	0	0	0	0	0	0	0	0	0	0	0	1	0	0	0	0	0	0	0	0	0	0	0	0	0	0	0	0	0	0	0	0	0	0	0	0	0	0	0	0	0	0	0	0
-0.877108	-0.480293	1	0	0	0	0	0	1	1	1	0	0	1	1	0	1	1	1	1	0	0	1	0	0	0	1	1	1	1	0	1	1	1	1	1	0	1	0	1	1	1	1	0	1	1	1	0	1	1
0.285132	0.958488	0	0	0	0	0	0	0	0	0	0	0	0	0	0	0	0	0	0	0	0	0	0	0	0	0	0	0	0	0	0	0	0	0	0	0	0	1	0	0	0	0	0	0	0	0	0	0	0
0.203518	0.979071	1	1	0	0	0	1	1	0	1	1	1	0	1	0	1	1	1	0	1	1	0	0	0	1	0	0	1	1	1	1	0	0	1	0	1	0	1	0	1	1	1	1	1	1	0	1	0	1
0.727244	-0.686379	1	1	1	1	1	1	1	1	1	1	1	1	1	1	1	0	1	1	1	1	1	1	1	1	1	1	1	0	1	1	1	1	0	1	1	1	1	1	1	0	1	1	0	1	1	1	1	1
0.518368	0.855158	0	1	0	0	0	1	0	0	0	0	1	0	0	0	0	1	0	0	0	1	0	0	0	1	0	0	0	0	0	0	0	0	0	0	0	0	1	0	0	0	0	1	0	0	0	0	0	0
-0.922301	-0.386473	0	0	0	0	0	0	0	0	0	0	0	0	0	0	1	0	0	0	0	0	1	0	0	0	1	0	0	0	0	0	1	1	0	0	0	1	0	0	0	0	0	0	1	0	1	0	1	0
0.15655	-0.98767	0	0	1	1	1	0	0	1	1	1	0	1	0	1	0	0	0	1	0	0	1	1	1	0	1	1	0	0	0	0	1	1	0	1	0	0	0	1	1	0	0	0	0	0	1	1	1	0
0.985117	0.171883	0	1	1	1	1	1	0	1	1	1	1	1	0	1	0	0	0	1	1	1	0	1	1	1	0	0	1	0	1	0	0	0	0	1	1	0	1	1	1	0	0	1	0	1	0	1	0	0
-0.547777	-0.836625	1	0	1	1	1	0	1	1	1	1	1	1	1	1	1	0	1	1	1	0	1	1	1	0	1	1	1	1	1	1	1	1	1	1	1	1	0	1	1	1	1	0	1	1	1	1	1	1
-0.121454	-0.992597	1	0	1	1	1	0	0	1	1	1	0	1	1	1	1	0	1	1	1	0	1	1	1	0	1	1	0	0	1	0	1	1	0	1	0	1	0	1	1	0	1	0	1	0	1	1	1	1
0.966882	0.255224	0	1	1	1	1	1	0	1	1	1	1	1	0	1	0	1	0	1	1	1	0	1	1	1	0	0	1	0	1	0	0	0	0	1	1	0	1	1	1	0	0	1	0	1	0	1	0	0
0.873332	-0.487125	0	1	1	1	1	1	0	1	1	1	1	1	0	1	0	0	0	1	1	1	1	1	1	1	1	1	0	0	1	0	0	0	0	1	1	0	1	1	1	0	0	0	0	0	0	1	0	0
0.796461	0.60469	0	1	1	0	1	1	0	0	0	1	1	0	0	0	0	1	0	0	1	1	0	1	1	1	0	0	1	0	1	0	0	0	0	0	1	0	1	0	0	0	0	1	0	1	0	0	0	0
0.293713	-0.955894	0	0	1	1	1	0	0	1	0	1	0	1	0	1	0	0	0	1	0	0	1	1	1	0	1	1	0	0	0	0	0	1	0	1	0	0	0	1	1	0	0	0	0	0	1	1	0	0
-0.260098	-0.965582	1	0	1	1	1	1	1	1	1	1	1	1	1	1	1	0	1	1	1	0	1	1	1	1	1	1	1	1	1	1	1	1	1	1	1	1	0	1	1	1	1	0	1	1	1	1	1	1
0.456864	-0.889537	0	0	1	1	1	1	0	1	0	1	0	1	0	1	0	0	0	1	0	0	1	1	1	0	1	1	0	0	0	0	0	0	0	1	0	0	0	1	1	0	0	0	0	0	1	1	0	0
0.736498	-0.676439	0	0	1	1	1	1	0	1	0	0	0	0	0	1	0	0	0	1	0	0	0	1	1	1	0	1	0	0	0	0	0	0	0	1	0	0	0	1	0	0	0	0	0	0	0	1	0	0
-0.299876	-0.953978	0	0	0	1	0	0	0	1	0	0	0	1	0	1	0	0	0	1	0	0	1	1	0	0	1	1	0	0	0	0	1	1	0	0	0	1	0	1	0	0	0	0	0	0	1	0	1	0
0.558057	0.829803	0	0	0	0	0	0	0	0	0	0	0	0	0	0	0	0	0	0	0	0	0	0	0	0	0	0	0	0	0	0	0	0	0	0	0	0	0	0	0	0	0	0	0	0	0	0	0	0
-0.280065	0.959981	1	1	0	0	0	1	1	0	1	0	1	0	1	0	1	1	1	0	1	1	0	0	0	1	0	0	1	1	1	1	1	0	1	0	1	1	1	0	0	1	1	1	1	1	0	0	1	1
0.45756	0.889179	1	1	1	1	1	1	1	1	1	1	1	1	1	1	1	1	1	1	1	1	1	1	1	1	1	0	1	1	1	1	1	0	1	1	1	1	1	1	1	1	1	1	1	1	0	1	1	1
-0.517132	-0.855906	1	0	0	1	0	0	0	1	1	0	0	1	1	1	1	0	1	1	0	0	1	1	1	0	1	1	0	0	0	0	1	1	0	1	0	1	0	1	1	0	1	0	1	0	1	0	1	1
0.77042	-0.637537	1	1	1	1	1	1	1	1	1	1	1	1	1	1	1	0	1	1	1	1	1	1	1	1	1	1	1	0	1	1	1	1	0	1	1	1	1	1	1	1	1	1	0	1	1	1	1	1
-0.77339	0.63393	1	1	0	0	0	0	1	0	1	0	1	0	1	0	1	1	1	0	0	1	1	0	0	0	1	0	1	1	0	1	1	1	1	0	1	1	1	0	0	1	1	1	1	1	1	0	1	1
0.958426	0.28534	0	1	1	1	1	1	1	1	1	1	1	1	0	1	0	1	0	1	1	1	0	1	1	1	0	0	1	0	1	0	0	0	0	1	1	0	1	1	1	0	0	1	0	1	0	1	0	0
-0.0591135	0.998251	0	1	0	0	0	0	0	0	0	0	0	0	0	0	0	1	0	0	0	0	0	0	0	0	0	0	0	0	0	0	0	0	0	0	0	0	1	0	0	0	0	1	0	0	0	0	0	0
0.987723	-0.156217	0	1	1	1	1	1	0	1	1	1	1	1	0	1	0	0	0	1	1	1	0	1	1	1	0	1	1	0	1	0	0	0	0	1	1	0	1	1	1	0	0	1	0	1	0	1	0	0
-0.0913557	0.995818	1	1	0	0	0	1	1	0	0	0	1	0	1	0	0	1	0	0	1	1	0	0	0	1	0	0	1	1	1	1	0	0	1	0	1	0	1	0	0	1	1	1	1	1	0	0	0	1
0.371263	0.928528	0	1	0	0	0	0	0	0	0	0	0	0	0	0	0	0	0	0	0	1	0	0	0	0	0	0	0	0	0	0	0	0	0	0	0	0	1	0	0	0	0	1	0	0	0	0	0	0
0.494008	-0.869457	0	0	1	1	1	1	0	1	1	1	0	1	0	1	0	0	0	1	0	0	1	1	1	1	1	1	0	0	1	0	0	1	0	1	0	0	0	1	1	0	0	0	0	0	1	1	0	0
0.178884	0.98387	0	1	0	0	0	1	0	0	0	0	1	0	0	0	0	1	0	0	0	1	0	0	0	1	0	0	1	1	0	1	0	0	1	0	0	0	1	0	0	1	0	1	0	1	0	0	0	0
-0.211352	0.97741	0	0	0	0	0	0	0	0	0	0	0	0	0	0	0	1	0	0	0	0	0	0	0	0	0	0	0	0	0	0	0	0	0	0	0	0	0	0	0	0	0	0	0	0	0	0	0	0
-0.989887	0.141857	1	0	0	0	0	0	1	0	0	0	0	0	1	0	1	1	1	0	0	0	1	0	0	0	1	0	1	1	0	1	1	1	1	0	0	1	0	0	0	1	1	0	1	1	1	0	1	1
-0.774497	-0.632577	1	0	0	1	0	0	1	1	1	1	0	1	1	1	1	0	1	1	0	0	1	0	0	0	1	1	1	1	0	1	1	1	1	1	0	1	0	1	1	1	1	0	1	1	1	1	1	1
-0.41113	0.911577	1	1	1	1	1	1	1	1	1	1	1	1	1	0	1	1	1	1	1	1	1	1	1	1	1	1	1	1	1	1	1	1	1	1	1	1	1	1	1	1	1	1	1	1	1	1	1	1
-0.647043	0.762454	1	0	0	0	0	0	0	0	0	0	0	0	0	0	0	1	0	0	0	0	0	0	0	0	0	0	0	1	0	1	0	0	1	0	0	0	0	0	0	1	0	0	1	0	0	0	0	0
0.155116	-0.987896	0	0	1	1	1	0	0	1	0	0	0	1	0	1	0	0	0	1	0	0	1	1	1	0	1	1	0	0	0	0	0	1	0	1	0	0	0	1	0	0	0	0	0	0	1	1	0	0
-0.981233	-0.192825	1	0	0	0	0	0	1	1	1	0	1	1	1	0	1	1	1	1	0	0	1	0	0	0	1	1	1	1	0	1	1	1	1	0	1	1	0	1	1	1	1	0	1	1	1	0	1	1
-0.19926	0.979947	1	1	0	0	0	0	1	0	0	0	1	0	1	0	0	1	0	0	0	1	0	0	0	0	0	0	1	1	0	1	0	0	1	0	1	0	1	0	0	1	0	1	1	1	0	0	0	1
0.877079	-0.480346	0	0	1	1	1	1	0	1	0	1	0	1	0	1	0	0	0	1	1	0	0	1	1	1	0	1	0	0	1	0	0	0	0	1	0	0	0	1	0	0	0	0	0	0	0	1	0	0
-0.401132	0.91602	1	1	0	0	0	0	1	0	0	0	1	0	1	0	1	1	1	0	1	1	0	0	0	1	0	0	1	1	1	1	1	0	1	0	1	1	1	0	0	1	1	1	1	1	0	0	1	1
0.99895	0.045821	0	1	1	1	1	1	1	1	1	1	1	1	0	1	0	1	0	1	1	1	0	1	1	1	0	1	1	0	1	1	0	0	0	1	1	0	1	1	1	0	1	1	0	1	0	1	0	1
0.773691	0.633564	1	1	1	1	1	1	1	1	1	1	1	1	1	1	1	1	1	1	1	1	0	1	1	1	0	0	1	1	1	1	0	0	1	1	1	0	1	1	1	1	1	1	0	1	0	1	0	1
-0.996541	0.0830969	1	0	0	0	0	0	1	0	1	0	0	0	1	0	1	1	1	0	0	0	1	0	0	0	1	1	1	1	0	1	1	1	1	0	1	1	0	0	0	1	1	0	1	1	1	0	1	1
0.942346	-0.334639	0	1	1	1	1	1	0	1	1	1	1	1	0	1	0	0	0	1	1	1	0	1	1	1	0	1	0	0	1	0	0	0	0	1	1	0	1	1	1	0	0	1	0	0	0	1	0	0
0.895517	-0.445027	0	0	1	1	1	1	0	1	0	0	0	0	0	1	0	0	0	0	0	0	0	1	1	1	0	0	0	0	0	0	0	0	0	1	0	0	0	1	0	0	0	0	0	0	0	1	0	0
-0.356607	-0.934255	1	0	1	1	1	0	1	1	1	1	0	1	1	1	1	0	1	1	0	0	1	1	1	0	1	1	0	0	0	0	1	1	0	1	0	1	0	1	1	0	1	0	1	0	1	1	1	1
-0.577747	0.816216	0	0	0	0	0	0	0	0	0	0	0	0	0	0	0	1	0	0	0	0	0	0	0	0	0	0	0	0	0	0	0	0	1	0	0	0	0	0	0	0	0	0	0	0	0	0	0	0
0.612523	0.790453	1	1	1	1	1	1	1	0	1	1	1	0	1	1	0	1	1	0	1	1	0	1	1	1	0	0	1	1	1	1	0	0	1	1	1	0	1	0	1	1	1	1	0	1	0	1	0	1
0.0626573	-0.998035	0	0	0	0	0	0	0	0	0	0	0	0	0	0	0	0	0	1	0	0	0	0	0	0	0	1	0	0	0	0	0	0	0	0	0	0	0	1	0	0	0	0	0	0	0	0	0	0
0.0300094	-0.99955	0	0	1	1	1	0	0	1	1	1	0	1	0	1	0	0	0	1	0	0	1	1	1	0	1	1	0	0	0	0	1	1	0	1	0	1	0	1	1	0	0	0	0	0	1	1	1	0
-0.982346	-0.187073	1	0	0	0	0	0	1	0	0	0	0	0	1	0	1	1	1	0	0	0	1	0	0	0	1	1	0	1	0	1	1	1	1	0	0	1	0	0	0	1	1	0	1	0	1	0	1	1
0.214003	0.976833	1	1	1	1	1	1	1	1	1	1	1	1	1	1	1	1	1	0	1	1	1	1	1	1	1	0	1	1	1	1	1	1	1	1	1	1	1	1	1	1	1	1	1	1	0	1	1	1
0.712731	0.701437	0	1	0	0	0	1	0	0	0	0	0	0	0	0	0	0	0	0	0	1	0	0	0	1	0	0	0	0	0	0	0	0	0	0	0	0	1	0	0	0	0	0	0	0	0	0	0	0
-0.198869	-0.980026	0	0	1	1	1	0	0	1	0	0	0	1	0	1	0	0	0	1	0	0	1	1	1	0	1	1	0	0	0	0	1	1	0	1	0	1	0	1	0	0	0	0	0	0	1	0	1	0
-0.0989274	0.995095	1	1	0	0	0	0	1	0	0	0	1	0	0	0	0	1	0	0	0	1	0	0	0	0	0	0	1	1	0	1	0	0	1	0	1	0	1	0	0	1	0	1	0	1	0	0	0	0
-0.913013	0.407931	1	1	0	0	0	0	1	0	1	1	1	1	1	0	1	1	1	1	1	1	1	0	0	0	1	1	1	1	1	1	1	1	1	0	1	1	1	0	1	1	1	1	1	1	1	0	1	1
-0.274998	-0.961445	0	0	1	1	1	0	0	1	1	0	0	1	0	1	1	0	1	1	0	0	1	1	1	0	1	1	0	0	0	0	1	1	0	1	0	1	0	1	1	0	0	0	1	0	1	1	1	0
0.134058	0.990973	0	0	0	0	0	0	0	0	0	0	0	0	0	0	0	0	0	0	0	0	0	0	0	0	0	0	0	0	0	0	0	0	0	0	0	0	0	0	0	0	0	0	0	0	0	0	0	0
0.397789	-0.917477	0	0	1	1	1	1	0	1	1	1	0	1	0	1	1	0	1	1	1	0	1	1	1	1	1	1	0	0	1	0	1	1	0	1	0	1	0	1	1	0	1	0	0	0	1	1	1	1
0.701276	-0.71289	0	0	1	1	1	0	0	1	0	0	0	0	0	1	0	0	0	1	0	0	0	1	1	0	0	1	0	0	0	0	0	0	0	1	0	0	0	1	0	0	0	0	0	0	0	0	0	0
0.902045	0.431642	0	1	1	1	1	1	0	0	0	1	1	0	0	1	0	1	0	0	1	1	0	1	1	1	0	0	1	0	1	0	0	0	0	1	1	0	1	0	0	0	0	1	0	1	0	1	0	0
0.310529	-0.950564	0	0	1	1	1	1	0	1	1	1	0	1	0	1	1	0	1	1	1	0	1	1	1	1	1	1	0	0	1	0	1	1	0	1	1	1	0	1	1	0	1	0	1	0	1	1	1	1
0.918181	-0.396162	0	1	1	1	1	1	0	1	1	1	1	1	0	1	0	0	0	1	1	1	1	1	1	1	1	1	0	0	1	0	0	0	0	1	1	0	1	1	1	0	0	1	0	0	0	1	0	0
-0.977519	0.210847	1	1	0	0	0	0	1	1	1	1	1	1	1	0	1	1	1	1	1	1	1	0	0	0	1	1	1	1	1	1	1	1	1	1	1	1	1	1	1	1	1	1	1	1	1	1	1	1
0.425338	-0.905035	0	0	1	1	1	0	0	1	0	1	0	1	0	1	0	0	0	1	0	0	1	1	1	0	1	1	0	0	0	0	0	0	0	1	0	0	0	1	0	0	0	0	0	0	1	1	0	0
0.0377127	0.999289	0	0	0	0	0	0	0	0	0	0	0	0	0	0	0	1	0	0	0	0	0	0	0	0	0	0	0	0	0	0	0	0	0	0	0	0	0	0	0	0	0	0	0	0	0	0	0	0
0.988016	-0.154353	0	0	1	1	1	1	0	1	0	1	0	0	0	1	0	0	0	1	1	1	0	1	1	1	0	0	0	0	1	0	0	0	0	1	0	0	1	1	0	0	0	0	0	0	0	1	0	0
-0.862699	0.505719	1	1	0	0	0	0	1	1	1	1	1	1	1	0	1	1	1	1	1	1	1	0	0	0	1	1	1	1	1	1	1	1	1	1	1	1	1	0	1	1	1	1	1	1	1	1	1	1
-0.961499	-0.274808	0	0	0	0	0	0	0	0	0	0	0	0	0	0	0	0	0	0	0	0	0	0	0	0	0	0	0	0	0	0	0	1	0	0	0	0	0	0	0	0	0	0	0	0	1	0	0	0
-0.835566	0.54939	1	1	0	0	0	0	1	0	0	0	1	0	1	0	1	1	1	0	0	0	1	0	0	0	1	0	1	1	0	1	1	1	1	0	1	1	0	0	0	1	1	1	1	1	1	0	1	1
-0.263466	-0.964669	1	0	1	1	1	0	0	1	1	1	0	1	1	1	1	0	1	1	0	0	1	1	1	0	1	1	0	0	0	0	1	1	0	1	0	1	0	1	1	0	1	0	1	0	1	1	1	1
-0.297872	0.954606	1	1	0	0	0	0	1	0	0	0	1	0	1	0	1	1	1	0	1	1	0	0	0	0	0	0	1	1	0	1	0	0	1	0	1	1	1	0	0	1	1	1	1	1	0	0	0	1
-0.751	0.660303	1	1	0	0	0	0	1	0	0	0	1	0	1	0	1	1	1	0	0	1	1	0	0	0	1	0	1	1	0	1	1	1	1	0	1	1	1	0	0	1	1	1	1	1	1	0	1	1
-0.700163	0.713983	1	1	0	0	0	1	1	0	1	1	1	1	1	0	1	1	1	0	1	1	1	0	0	1	1	0	1	1	1	1	1	1	1	1	1	1	1	0	1	1	1	1	1	1	1	1	1	1
-0.284199	-0.958765	1	0	1	1	1	0	1	1	1	1	1	1	1	1	1	0	1	1	1	0	1	1	1	0	1	1	1	1	1	1	1	1	1	1	1	1	0	1	1	1	1	0	1	1	1	1	1	1
0.979918	0.199402	1	1	1	1	1	1	1	1	1	1	1	1	1	1	0	1	1	1	1	1	0	1	1	1	0	1	1	1	1	1	0	0	1	1	1	0	1	1	1	1	1	1	0	1	0	1	0	1
-0.563817	0.8259	1	1	0	0	0	0	1	0	0	0	1	0	1	0	1	1	1	0	0	1	0	0	0	0	0	0	1	1	0	1	1	0	1	0	1	1	1	0	0	1	1	1	1	1	0	0	1	1
-0.844589	0.535415	1	0	0	0	0	0	1	0	0	0	0	0	1	0	1	1	0	0	0	0	0	0	0	0	0	0	0	1	0	1	1	0	1	0	0	1	0	0	0	1	0	0	1	0	0	0	1	0
0.919079	-0.394074	1	1	1	1	1	1	1	1	1	1	1	1	1	1	1	1	1	1	1	1	1	1	1	1	1	1	1	0	1	1	1	1	0	1	1	0	1	1	1	1	1	1	0	1	1	1	1	1
0.763075	0.64631	1	1	1	1	1	1	1	1	1	1	1	1	1	1	1	1	1	1	1	1	1	1	1	1	1	1	1	1	1	1	0	0	1	1	1	0	1	1	1	1	1	1	1	1	0	1	0	1
0.489683	0.871901	1	1	1	1	1	1	1	0	1	1	1	0	1	1	0	1	1	0	1	1	0	1	1	1	0	0	1	1	1	1	0	0	1	1	1	0	1	0	1	1	1	1	0	1	0	1	0	1
0.0557699	-0.998444	0	0	0	0	0	0	0	1	0	0	0	0	0	1	0	0	0	1	0	0	0	1	0	0	0	1	0	0	0	0	0	0	0	0	0	0	0	1	0	0	0	0	0	0	1	0	0	0
-0.881132	-0.47287	1	0	0	1	1	0	1	1	1	1	1	1	1	1	1	1	1	1	1	0	1	1	1	0	1	1	1	1	1	1	1	1	1	1	1	1	0	1	1	1	1	0	1	1	1	1	1	1
0.24709	-0.968993	0	0	1	1	1	0	0	1	0	0	0	1	0	1	0	0	0	1	0	0	0	1	1	0	0	1	0	0	0	0	0	0	0	1	0	0	0	1	0	0	0	0	0	0	1	0	0	0
-0.604718	0.79644	1	1	0	0	0	1	1	1	1	1	1	1	1	0	1	1	1	1	1	1	1	0	0	1	1	1	1	1	1	1	1	1	1	1	1	1	1	0	1	1	1	1	1	1	1	1	1	1
-0.775523	0.63132	1	0	0	0	0	0	0	0	0	0	0	0	0	0	0	1	0	0	0	0	0	0	0	0	0	0	0	1	0	1	0	0	1	0	0	0	0	0	0	1	0	0	1	0	0	0	0	0
0.462826	-0.886449	0	0	1	1	1	0	0	1	0	0	0	1	0	1	0	0	0	1	0	0	0	1	1	0	0	1	0	0	0	0	0	0	0	1	0	0	0	1	0	0	0	0	0	0	0	0	0	0
-0.835208	0.549934	1	0	0	0	0	0	1	0	0	0	0	0	1	0	1	1	0	0	0	0	0	0	0	0	0	0	0	1	0	1	1	1	1	0	0	1	0	0	0	1	0	0	1	0	0	0	1	0
-0.313539	-0.949575	0	0	1	1	1	0	0	1	0	0	0	1	0	1	1	0	1	1	0	0	1	1	1	0	1	1	0	0	0	0	1	1	0	1	0	1	0	1	0	0	0	0	1	0	1	0	1	0
-0.730062	-0.683381	1	1	1	1	1	0	1	1	1	1	1	1	1	1	1	1	1	1	1	0	1	1	1	0	1	1	1	1	1	1	1	1	1	1	1	1	0	1	1	1	1	1	1	1	1	1	1	1
-0.932669	0.360732	1	1	0	0	0	0	1	1	1	1	1	1	1	0	1	1	1	1	1	1	1	0	0	1	1	1	1	1	1	1	1	1	1	1	1	1	1	1	1	1	1	1	1	1	1	1	1	1
-0.65816	-0.752878	1	0	1	1	1	0	1	1	1	1	1	1	1	1	1	1	1	1	1	0	1	1	1	0	1	1	1	1	1	1	1	1	1	1	1	1	0	1	1	1	1	0	1	1	1	1	1	1
-0.981772	0.190062	0	0	0	0	0	0	0	0	0	0	0	0	0	0	0	0	0	0	0	0	0	0	0	0	0	0	0	1	0	0	1	1	1	0	0	1	0	0	0	0	0	0	1	0	0	0	1	0
-0.54094	0.841061	1	1	0	0	0	0	1	0	1	0	1	0	1	0	1	1	1	0	1	1	0	0	0	0	0	0	1	1	1	1	1	1	1	0	1	1	1	0	1	1	1	1	1	1	0	0	1	1
0.97681	-0.214106	0	0	1	0	0	1	0	0	0	0	0	0	0	0	0	0	0	0	0	0	0	1	0	0	0	0	0	0	0	0	0	0	0	0	0	0	0	0	0	0	0	0	0	0	0	0	0	0
0.773742	0.633501	1	1	1	1	1	1	1	1	1	1	1	1	1	1	0	1	0	0	1	1	0	1	1	1	0	0	1	1	1	1	0	0	1	1	1	0	1	1	1	1	1	1	0	1	0	1	0	1
-0.968992	-0.247091	0	0	0	0	0	0	0	0	0	0	0	0	0	0	1	0	0	0	0	0	0	0	0	0	0	0	0	0	0	0	1	1	0	0	0	1	0	0	0	0	0	0	1	0	1	0	1	0
0.381354	0.924429	0	1	0	0	0	1	1	0	0	0	1	0	0	0	0	1	0	0	1	1	0	0	0	1	0	0	1	1	1	1	0	0	1	0	1	0	1	0	0	1	0	1	0	1	0	0	0	0
-0.992778	-0.119965	1	0	0	0	0	0	0	0	0	0	0	0	1	0	1	0	1	0	0	0	1	0	0	0	1	0	0	1	0	0	1	1	1	0	0	1	0	0	0	1	0	0	1	0	1	0	1	0
0.734092	-0.67905	0	0	1	0	1	0	0	0	0	0	0	0	0	1	0	0	0	0	0	0	0	1	1	0	0	0	0	0	0	0	0	0	0	0	0	0	0	0	0	0	0	0	0	0	0	0	0	0
-0.0385645	0.999256	1	1	1	1	1	1	1	1	1	1	1	1	1	1	1	1	1	0	1	1	1	1	1	1	1	0	1	1	1	1	1	1	1	1	1	1	1	1	1	1	1	1	1	1	1	1	1	1
0.959366	-0.282165	1	1	1	1	1	1	1	1	1	1	1	1	1	1	1	1	1	1	1	1	1	1	1	1	1	1	1	0	1	1	0	1	0	1	1	0	1	1	1	1	1	1	0	1	1	1	1	1
-0.1107	0.993854	1	1	0	0	0	1	1	0	1	1	1	0	1	0	1	1	1	0	1	1	0	0	0	1	0	0	1	1	1	1	1	0	1	0	1	1	1	0	1	1	1	1	1	1	0	0	1	1
0.143146	-0.989702	1	1	1	1	1	1	1	1	1	1	1	1	1	1	1	0	1	1	1	1	1	1	1	1	1	1	1	1	1	1	1	1	1	1	1	1	1	1	1	1	1	1	1	1	1	1	1	1
-0.983331	-0.181827	0	0	0	0	0	0	0	0	0	0	0	0	0	0	0	0	0	0	0	0	0	0	0	0	0	0	0	0	0	0	1	1	0	0	0	1	0	0	0	0	0	0	1	0	1	0	1	0
0.999373	-0.0354055	0	1	1	1	1	1	0	1	0	1	0	0	0	1	0	0	0	0	1	1	0	1	1	1	0	0	0	0	1	0	0	0	0	1	0	0	1	1	0	0	0	1	0	0	0	1	0	0
-0.479545	0.877517	1	1	0	0	0	1	1	0	1	1	1	1	1	0	1	1	1	0	1	1	1	0	0	1	1	0	1	1	1	1	1	1	1	1	1	1	1	0	1	1	1	1	1	1	1	1	1	1
0.967455	0.253043	0	1	1	1	1	1	0	1	1	1	1	0	0	1	0	0	0	0	1	1	0	1	1	1	0	0	1	0	1	0	0	0	0	1	1	0	1	1	1	0	0	1	0	1	0	1	0	0
0.284158	0.958777	1	1	0	0	0	1	1	0	0	1	1	0	1	0	0	1	0	0	1	1	0	0	0	1	0	0	1	1	1	1	0	0	1	0	1	0	1	0	0	1	0	1	0	1	0	0	0	1
-0.975846	0.218459	0	0	0	0	0	0	0	0	0	0	0	0	0	0	0	0	0	0	0	0	0	0	0	0	0	0	0	0	0	0	1	0	0	0	0	1	0	0	0	0	0	0	1	0	0	0	0	0
0.927999	-0.372583	1	1	1	1	1	1	1	1	1	1	1	1	1	1	1	1	1	1	1	1	1	1	1	1	1	1	1	1	1	1	1	1	1	1	1	1	1	1	1	1	1	1	1	1	1	1	1	1
0.540564	0.841303	0	1	0	0	0	1	0	0	0	0	1	0	0	0	0	1	0	0	1	1	0	0	0	1	0	0	1	1	1	1	0	0	1	0	1	0	1	0	0	1	0	1	0	1	0	0	0	0
0.999934	0.0115177	0	1	1	1	1	1	0	0	0	1	0	0	0	1	0	0	0	0	1	1	0	1	1	1	0	0	0	0	1	0	0	0	0	1	0	0	1	0	0	0	0	0	0	0	0	1	0	0
-0.884875	0.465829	1	1	0	1	0	1	1	1	1	1	1	1	1	0	1	1	1	1	1	1	1	0	1	1	1	1	1	1	1	1	1	1	1	1	1	1	1	1	1	1	1	1	1	1	1	1	1	1
0.816754	-0.576986	0	0	1	0	0	0	0	0	0	0	0	0	0	1	0	0	0	0	0	0	0	1	0	0	0	0	0	0	0	0	0	0	0	0	0	0	0	0	0	0	0	0	0	0	0	0	0	0
0.501229	-0.865315	0	0	1	1	1	1	0	1	1	1	1	1	0	1	1	0	1	1	1	0	1	1	1	1	1	1	0	0	1	0	1	1	0	1	1	1	0	1	1	0	1	0	0	0	1	1	1	1
0.725074	0.68867	1	1	1	1	1	1	1	1	1	1	1	1	1	1	1	1	1	1	1	1	1	1	1	1	1	1	1	1	1	1	1	0	1	1	1	1	1	1	1	1	1	1	1	1	0	1	1	1
0.908914	-0.416983	0	1	1	1	1	1	0	1	1	1	1	1	0	1	0	0	0	1	1	1	0	1	1	1	0	1	0	0	1	0	0	0	0	1	1	0	1	1	1	0	0	0	0	0	0	1	0	0
0.998785	0.0492702	0	1	1	1	1	1	0	1	1	1	1	1	0	1	0	0	0	1	1	1	0	1	1	1	0	0	0	0	1	0	0	0	0	1	1	0	1	1	1	0	0	1	0	0	0	1	0	0
0.461122	-0.887337	0	0	1	1	1	0	0	1	0	0	0	0	0	1	0	0	0	1	0	0	0	1	1	0	0	1	0	0	0	0	0	0	0	0	0	0	0	1	0	0	0	0	0	0	0	0	0	0
[truncated: 55 more columns]

## Sheet: 5
		0	1	2	3	4	5	6	7	8	9	10	11	12	13	14	15	16	17	18	19	20	21	22	23	24	25	26	27	28	29	30	31	32	33	34	35	36	37	38	39	40	41	42	43	44	45	46	47
-0.853154	-0.521659	1	0	0	0	0	0	0	0	0	0	0	0	1	0	1	0	1	1	0	0	1	0	0	0	1	1	0	0	0	0	1	1	0	0	0	1	0	0	0	0	0	0	1	0	1	0	1	0
-0.993395	0.114744	1	1	0	1	1	0	1	1	1	1	1	1	1	1	1	1	1	1	1	1	1	0	1	0	1	1	1	1	1	1	1	1	1	1	1	1	1	1	1	1	1	1	1	1	1	1	1	1
-0.775656	0.631156	1	1	0	0	0	0	1	0	0	0	0	0	1	0	1	1	1	0	0	0	0	0	0	0	0	0	1	1	0	1	1	1	1	0	0	1	0	0	0	1	1	1	1	1	0	0	1	1
0.892825	0.450404	0	1	1	1	1	1	0	0	0	1	1	0	0	1	0	0	0	0	1	1	0	1	1	1	0	0	0	0	1	0	0	0	0	0	1	0	1	0	0	0	0	1	0	0	0	1	0	0
0.661753	-0.749722	0	0	1	1	1	1	0	1	0	0	0	0	0	1	0	0	0	1	0	0	0	1	1	0	0	1	0	0	0	0	0	0	0	1	0	0	0	1	0	0	0	0	0	0	0	1	0	0
0.755804	-0.654798	0	0	1	1	1	1	0	1	1	1	1	1	0	1	0	0	1	1	1	1	1	1	1	1	1	1	0	0	1	0	0	1	0	1	1	0	1	1	1	0	1	0	0	0	1	1	0	0
-0.925281	-0.379283	1	0	0	0	0	0	1	1	1	0	0	1	1	0	1	1	1	1	0	0	1	0	0	0	1	1	1	1	0	1	1	1	1	0	0	1	0	1	1	1	1	0	1	1	1	0	1	1
-0.609215	-0.793005	1	0	0	1	0	0	0	1	1	0	0	1	1	1	1	0	1	1	0	0	1	1	1	0	1	1	0	0	0	0	1	1	0	1	0	1	0	1	1	0	1	0	1	0	1	1	1	1
-0.743892	-0.6683	1	0	0	1	0	0	1	1	1	0	0	1	1	1	1	0	1	1	0	0	1	0	0	0	1	1	0	1	0	1	1	1	1	1	0	1	0	1	1	1	1	0	1	0	1	u	1	1
0.998313	-0.0580601	0	0	1	u	1	1	0	0	0	0	0	0	0	1	0	0	0	0	0	0	0	1	1	1	0	0	0	0	0	0	0	0	0	0	0	0	0	0	0	0	0	0	0	0	0	0	0	0
-0.797942	-0.602734	1	0	0	0	0	0	1	1	1	0	0	1	1	1	1	0	1	1	0	0	1	0	0	0	1	1	0	1	0	1	1	1	1	1	0	1	0	1	1	1	1	0	1	0	1	0	1	1
0.1061	-0.994355	0	0	1	1	1	1	0	1	1	1	0	1	1	1	1	0	1	1	1	0	1	1	1	1	1	1	0	0	1	0	1	1	0	1	0	1	0	1	1	0	1	0	1	0	1	1	1	1
-0.881188	0.472766	1	0	0	0	0	0	1	0	0	0	0	0	1	0	1	1	1	0	0	0	0	0	0	0	0	0	1	1	0	1	1	1	1	0	0	1	0	0	0	1	u	0	1	1	0	0	1	1
0.730505	-0.682907	0	1	1	1	1	1	0	1	1	1	1	1	0	1	0	0	1	1	1	1	1	1	1	1	1	1	0	0	1	0	0	1	0	1	1	0	1	1	1	0	1	0	0	0	1	1	0	1
0.839147	0.543904	0	1	1	1	1	1	0	0	0	1	1	0	0	1	0	1	0	0	1	1	0	1	1	1	0	0	1	0	1	0	0	0	0	0	1	0	1	0	0	0	0	1	0	1	0	1	0	0
0.949548	0.313622	0	1	1	0	1	1	0	0	0	0	0	0	0	0	0	0	0	0	0	1	0	1	1	1	0	0	0	0	u	0	0	0	0	0	0	0	1	0	0	0	0	0	0	0	0	0	0	0
0.885481	0.464676	0	1	1	1	1	1	1	1	1	1	1	1	0	1	0	1	0	0	1	1	0	1	1	1	0	0	1	1	1	1	0	0	1	1	1	0	1	1	1	1	1	1	0	1	0	1	0	1
0.999592	0.0285473	0	1	1	1	1	1	0	1	0	1	1	0	0	1	0	0	0	0	1	1	0	1	1	1	0	0	0	0	1	0	0	0	0	1	0	0	1	1	0	0	0	1	0	0	0	1	0	0
-0.65339	0.757021	1	1	0	0	0	0	1	0	0	0	1	0	1	0	1	1	1	0	0	1	0	0	0	0	0	0	1	1	0	1	1	1	1	0	1	1	1	0	0	1	1	1	1	1	0	0	1	1
0.554947	0.831886	0	1	0	0	0	1	0	0	0	0	1	0	0	0	0	1	0	0	0	1	0	0	0	1	0	0	0	0	u	0	0	0	0	0	0	0	1	0	0	0	0	1	0	0	0	0	0	0
-0.652795	-0.757535	1	0	0	1	0	0	0	1	1	0	0	1	1	1	1	0	1	1	0	0	1	0	0	0	1	1	0	0	0	0	1	1	0	1	0	1	0	1	1	0	1	0	1	0	1	0	1	1
0.961308	0.275477	0	1	1	1	1	1	0	0	0	u	0	0	0	1	0	0	0	0	1	1	0	1	1	1	0	0	0	0	1	0	0	0	0	0	0	0	1	0	0	0	0	1	0	0	0	1	0	0
0.917184	-0.398464	0	1	1	1	1	1	0	1	1	1	1	1	0	1	0	0	0	1	1	1	1	1	1	1	1	1	1	0	1	0	0	0	0	1	1	0	1	1	1	0	1	1	0	1	1	1	0	1
0.863298	-0.504695	0	1	1	1	1	1	0	1	1	1	1	1	0	1	0	0	1	1	1	1	1	1	1	1	1	1	1	0	1	0	0	0	0	1	1	0	1	1	1	0	1	1	0	1	1	1	0	1
-0.481276	0.876569	1	1	0	0	0	1	1	0	1	1	1	0	1	0	1	1	1	0	1	1	1	0	0	1	1	0	1	1	1	1	1	1	1	0	1	1	1	0	1	1	1	1	1	1	0	0	1	1
-0.732846	-0.680395	1	0	0	1	0	0	1	1	1	1	0	1	1	1	1	0	1	1	0	0	1	1	1	0	1	1	1	1	0	1	1	1	1	1	0	1	0	1	1	1	1	0	1	1	1	1	1	1
-0.189704	0.981841	1	1	0	0	0	1	1	0	0	0	1	0	1	0	1	1	1	0	1	1	0	0	0	1	0	0	1	1	1	1	0	0	1	0	1	u	1	0	0	1	1	1	1	1	0	0	0	1
-0.945188	-0.326526	1	0	0	0	0	0	1	0	0	0	0	u	1	0	1	0	1	1	0	0	1	0	0	0	1	1	0	1	0	1	1	1	1	0	0	1	0	0	0	1	1	0	1	0	1	0	1	1
0.991422	0.130697	0	1	1	1	1	1	1	1	1	1	1	1	0	1	0	1	0	1	1	1	0	1	1	1	0	1	1	0	1	0	0	0	0	1	1	0	1	1	1	0	1	1	0	1	0	1	0	1
0.817048	0.576569	1	1	1	1	1	1	1	1	1	1	1	1	1	1	0	1	0	0	1	1	0	1	1	1	0	0	1	1	1	1	0	0	1	1	1	0	1	1	1	1	1	1	0	1	0	1	0	1
-0.939848	0.341594	1	0	0	0	0	0	u	0	0	0	0	0	1	0	1	1	0	0	0	0	0	0	0	0	0	0	0	1	0	1	1	1	1	0	0	1	0	0	0	1	0	0	1	0	0	0	1	0
-0.971666	0.236359	1	1	0	0	0	0	1	0	1	0	1	1	1	0	1	1	1	0	0	0	1	0	0	0	1	1	1	1	0	1	1	1	1	0	1	1	0	0	1	1	1	1	1	1	1	0	1	1
-0.19481	-0.980841	1	0	1	1	1	1	1	1	1	1	1	1	1	1	1	0	1	1	1	0	1	1	1	1	1	1	1	1	1	1	1	1	1	1	1	1	0	1	1	1	1	1	1	1	1	1	1	1
-0.466026	0.884771	1	1	0	0	0	0	1	0	0	0	1	0	1	0	1	1	1	0	0	1	0	0	0	0	0	0	1	1	0	1	1	0	1	0	1	1	1	0	0	1	1	1	1	1	0	0	1	1
0.722347	0.691531	0	1	0	0	0	1	0	0	0	0	1	0	0	0	0	1	0	0	1	1	0	0	0	1	0	0	0	0	1	0	0	0	0	0	0	0	1	0	0	0	0	1	0	0	0	0	0	0
0.536252	-0.844058	0	0	1	1	1	1	0	1	0	1	0	1	0	1	0	0	0	1	0	0	1	1	1	1	1	1	0	0	u	0	0	0	0	1	0	0	0	1	1	0	0	0	0	0	1	1	0	0
-0.917198	-0.398431	0	0	0	0	0	0	0	0	0	0	0	0	0	0	0	0	0	0	0	0	0	0	0	0	0	0	0	0	0	0	1	1	0	0	0	1	0	0	0	0	0	0	1	0	1	0	1	0
0.921798	-0.38767	0	1	1	1	1	1	1	1	1	1	1	1	0	1	0	0	1	1	1	1	1	1	1	1	1	1	1	0	1	0	0	0	0	1	1	0	1	1	1	0	1	1	0	1	1	1	0	1
-0.853389	-0.521275	1	0	0	0	0	0	0	0	0	0	0	1	1	0	1	0	1	1	0	0	1	0	0	0	1	1	0	1	0	0	1	1	u	0	0	1	0	1	0	0	1	0	1	0	1	0	1	1
0.953113	-0.302616	0	0	1	1	1	1	0	1	0	1	0	0	0	1	0	0	0	1	1	u	0	1	1	1	0	0	0	0	1	0	0	0	0	1	0	0	1	1	0	0	0	0	0	0	0	1	0	0
0.666456	-0.745545	1	1	1	1	1	1	1	1	1	1	1	1	1	1	1	0	1	1	1	1	1	1	1	1	1	1	1	0	1	1	1	1	0	1	1	1	1	1	1	1	1	1	1	1	1	1	1	1
0.984874	0.17327	0	0	1	0	u	1	0	0	0	0	0	0	0	0	0	0	0	0	0	0	0	u	0	1	0	0	0	0	0	0	0	0	0	0	0	0	u	0	0	0	0	0	0	0	0	0	0	0
-0.494477	0.869191	0	0	0	0	0	0	0	0	0	0	0	0	0	0	0	1	0	0	0	0	0	0	0	0	0	0	0	1	0	1	0	0	1	0	0	0	0	0	0	1	0	0	0	0	0	0	0	0
0.981048	-0.193765	0	0	1	1	1	1	0	1	0	1	0	0	0	1	0	0	0	0	1	1	0	1	1	1	0	0	0	0	1	0	0	0	0	1	0	0	1	1	0	0	0	0	0	0	0	1	0	0
-0.410173	0.912008	1	1	0	0	0	0	0	0	0	0	0	0	0	0	0	1	0	0	0	1	0	0	0	0	0	0	1	1	0	1	0	0	1	0	0	0	1	0	0	1	0	1	0	1	0	0	0	0
-0.674188	0.73856	1	1	0	0	0	0	1	0	0	0	1	0	1	0	1	1	1	0	0	1	0	0	0	0	0	0	1	1	0	1	1	1	1	0	1	1	1	0	0	1	1	1	1	1	0	0	1	1
0.316914	-0.948454	0	0	0	0	0	0	0	0	0	0	0	0	0	1	0	0	0	1	0	0	0	1	0	0	0	1	0	0	0	0	0	0	0	0	0	0	0	1	0	0	0	0	0	0	0	0	0	0
0.575159	-0.818042	0	0	1	1	1	1	0	1	0	1	0	1	0	1	0	0	0	1	0	0	0	1	1	1	0	1	0	0	0	0	0	0	0	1	0	0	0	1	0	0	0	0	0	0	1	1	0	0
-0.00185062	0.999998	1	1	0	0	0	1	1	0	1	1	1	0	1	0	1	1	1	0	1	1	0	0	0	1	0	0	1	1	1	1	1	0	1	1	1	1	1	0	1	1	1	1	1	1	0	1	1	1
0.426313	0.904576	1	1	1	1	1	1	1	1	1	1	1	1	1	1	1	1	1	0	1	1	0	1	1	1	0	0	1	1	1	1	0	0	1	1	1	1	1	0	1	1	1	1	1	1	0	1	0	1
0.998237	0.0593595	0	0	1	0	0	1	0	0	0	0	0	0	0	0	0	0	0	0	0	0	0	0	0	1	0	0	0	0	0	0	0	0	0	0	0	0	0	0	0	0	0	0	0	0	0	0	0	0
-0.950924	-0.309425	1	0	0	0	0	0	1	1	1	0	0	1	1	0	1	1	1	1	0	0	1	0	0	0	1	1	1	1	0	1	1	1	1	0	0	1	0	1	1	1	1	0	1	1	1	0	1	1
-0.758847	-0.651269	0	0	0	0	0	0	0	0	0	0	0	0	0	0	0	0	0	0	0	0	0	0	0	0	0	0	0	0	0	0	0	1	0	0	0	0	0	0	0	0	0	0	0	0	1	0	0	0
0.700473	0.713679	0	1	1	0	1	1	0	0	0	1	1	0	0	0	0	1	0	0	1	1	0	1	1	1	0	0	1	0	1	0	0	0	0	0	1	0	1	0	0	0	0	1	0	1	0	u	0	0
0.280601	-0.959824	0	0	1	1	1	0	0	1	1	1	0	1	0	1	0	0	0	1	0	0	1	1	1	0	1	1	0	0	0	0	0	1	0	1	0	0	0	1	1	0	0	0	0	0	1	1	0	0
0.563585	0.826058	0	1	1	0	1	1	1	0	0	1	1	0	0	0	0	1	0	0	1	1	0	0	0	1	0	0	1	1	1	1	0	0	1	0	1	0	1	0	0	1	0	1	0	1	0	0	0	0
0.54834	0.836255	1	1	1	1	1	1	1	0	1	1	1	0	1	0	0	1	0	0	1	1	0	1	1	1	0	0	1	1	1	1	0	0	1	1	1	0	1	0	1	1	1	1	0	1	0	1	0	1
-0.890924	-0.454153	1	0	0	0	0	0	1	1	1	0	0	1	1	0	1	0	1	1	0	0	1	0	0	0	1	1	0	1	0	1	1	1	1	0	0	1	0	1	1	1	1	0	1	0	1	0	1	1
0.987384	-0.158343	0	0	1	1	1	1	0	0	0	0	0	0	0	1	0	0	0	0	0	0	0	1	1	1	0	0	0	0	0	0	0	0	0	0	0	0	0	0	0	0	0	0	0	0	0	0	0	0
0.924513	-0.381151	0	0	1	1	1	1	0	1	1	1	0	1	0	1	0	0	0	1	1	1	0	1	1	1	0	1	0	0	1	0	0	0	0	1	0	0	1	1	1	0	0	0	0	0	0	1	0	0
0.686761	0.726884	1	1	1	1	1	1	1	1	1	1	1	1	1	1	1	1	1	1	1	1	0	1	1	1	0	0	1	1	1	1	0	0	1	1	1	0	1	1	1	1	1	1	1	1	0	1	0	1
-0.295675	-0.955289	1	0	1	1	1	1	1	1	1	1	1	1	1	1	1	1	1	1	1	0	1	1	1	1	1	1	1	1	1	1	1	1	1	1	1	1	0	1	1	1	1	1	1	1	1	1	1	1
0.622068	0.782964	0	1	0	0	0	1	0	0	0	0	1	0	0	0	0	1	0	0	0	1	0	0	0	1	0	0	0	0	u	0	0	0	0	0	0	0	1	0	0	0	0	1	0	0	0	0	0	0
0.956488	0.291772	0	1	1	1	1	1	1	1	1	1	1	1	0	1	0	1	0	1	1	1	0	1	1	1	0	1	1	1	1	1	0	0	1	1	1	0	1	1	1	1	1	1	0	1	0	1	0	1
0.422506	-0.90636	0	0	1	1	1	1	0	1	1	1	0	1	0	1	0	0	0	1	1	0	1	1	1	1	1	1	0	0	1	0	0	1	0	1	0	0	0	1	1	0	0	0	0	0	1	1	0	0
0.599701	0.800224	0	1	0	0	0	1	0	0	0	0	1	0	0	0	0	1	0	0	1	1	0	0	0	1	0	0	1	0	1	0	0	0	0	0	1	0	1	0	0	0	0	1	0	1	0	0	0	0
-0.521368	0.853332	1	1	0	0	0	0	1	0	0	0	1	0	1	0	1	1	1	0	0	1	0	0	0	0	0	0	1	1	0	1	1	0	1	0	1	1	1	0	0	1	1	1	1	1	0	0	1	1
0.445241	-0.895411	0	0	1	1	1	1	0	1	1	1	0	1	0	1	0	0	0	1	1	0	1	1	1	1	1	1	0	0	1	0	0	1	0	1	0	0	0	1	1	0	0	0	0	0	1	1	1	0
-0.555545	-0.831487	1	0	1	1	1	0	1	1	1	1	1	1	1	1	1	1	1	1	1	0	1	1	1	0	1	1	1	1	1	1	1	1	1	1	1	1	0	1	1	1	1	0	1	1	1	1	1	1
-0.941828	-0.336094	0	0	0	0	0	0	0	0	0	0	0	0	0	0	1	0	0	0	0	0	1	0	0	0	1	0	0	0	0	0	1	1	0	0	0	1	0	0	0	0	0	0	1	0	1	0	1	0
-0.067343	0.99773	1	1	0	0	0	1	1	0	0	0	1	0	1	0	0	1	0	0	0	1	0	0	0	1	0	0	1	1	0	1	0	0	1	0	1	0	1	0	0	1	0	1	0	1	0	0	0	u
-0.434087	0.900871	1	1	0	0	0	0	1	0	0	0	1	0	1	0	0	1	0	0	0	1	0	0	0	0	0	0	1	1	0	1	0	0	1	0	1	0	1	0	0	1	0	1	1	1	0	0	0	u
-0.182913	-0.983129	1	0	1	1	1	0	1	1	1	1	0	1	1	1	1	0	1	1	1	0	1	1	1	0	1	1	0	0	1	u	1	1	0	1	1	1	0	1	1	u	1	0	1	0	1	1	1	1
0.29013	0.956987	1	1	0	0	0	1	1	0	1	1	1	0	1	0	0	1	1	0	1	1	0	0	0	1	0	0	1	1	1	1	0	0	1	0	1	0	1	0	1	1	1	1	0	1	0	1	0	1
0.119567	-0.992826	1	0	1	1	1	1	1	1	1	1	u	1	1	1	1	0	1	1	1	0	1	1	1	1	1	1	0	0	1	0	1	1	0	1	1	1	0	1	1	0	1	0	1	0	1	1	1	1
0.245134	0.969489	0	1	0	0	0	1	0	0	0	0	1	0	0	0	0	1	0	0	0	1	0	0	0	1	0	0	0	0	0	0	0	0	1	0	0	0	1	0	0	0	0	1	0	u	0	0	0	0
-0.990561	0.137074	1	0	0	0	0	0	0	0	0	0	0	0	1	0	1	0	0	0	0	0	0	0	0	0	0	0	0	1	0	0	1	1	1	0	0	1	0	0	0	0	0	0	1	0	1	0	1	0
0.926126	0.377214	0	1	1	0	1	1	0	0	0	0	0	0	0	0	0	0	0	0	0	1	0	0	0	1	0	0	0	0	0	0	0	0	0	0	0	0	1	0	0	0	0	0	0	0	0	0	0	0
0.87368	0.486502	1	1	1	1	1	1	1	1	1	1	1	1	1	1	1	1	1	1	1	1	1	1	1	1	1	1	1	1	1	1	0	0	1	1	1	0	1	1	1	1	1	1	0	1	0	1	0	1
-0.594773	-0.803894	0	0	0	0	0	0	0	0	0	0	0	0	0	0	0	0	0	1	0	0	1	0	0	0	1	1	0	0	0	0	1	1	0	0	0	1	0	1	0	0	0	0	1	0	1	0	1	0
-0.477192	-0.878799	1	0	1	1	1	0	0	1	1	0	0	1	1	1	1	0	1	1	0	0	1	1	1	0	1	1	0	0	0	0	1	1	0	1	0	1	0	1	1	0	1	0	1	0	1	1	1	1
0.658734	0.752376	0	1	0	0	0	1	0	0	0	0	1	0	0	0	0	1	0	0	1	1	0	0	0	1	0	0	1	0	1	0	0	0	0	0	1	0	1	0	0	0	0	1	0	1	0	0	0	0
0.655263	-0.7554	0	0	1	1	1	1	0	1	0	1	0	1	0	1	0	0	0	1	0	0	0	1	1	1	0	1	0	0	0	0	0	0	0	1	0	0	0	1	0	0	0	0	0	0	0	1	0	0
0.194143	0.980973	0	1	0	0	0	0	0	0	0	0	0	0	0	0	0	1	0	0	0	1	0	0	0	0	0	0	0	0	0	0	0	0	0	0	0	0	1	0	0	0	0	1	0	0	0	0	0	0
0.132028	-0.991246	0	0	1	1	1	0	0	1	0	0	0	1	0	1	0	0	0	1	0	0	0	1	1	0	0	1	0	0	0	0	0	0	0	0	0	0	0	1	0	0	0	0	0	0	1	0	0	0
0.859262	0.511536	1	1	1	1	1	1	1	1	1	1	1	1	1	1	0	1	u	1	1	1	0	1	1	1	0	0	1	1	1	1	0	0	1	1	1	0	1	1	1	1	1	1	0	1	0	1	0	1
0.269462	0.963011	0	1	0	0	0	0	0	0	0	0	0	0	0	0	0	1	0	0	0	1	0	0	0	0	0	0	0	0	0	0	0	0	0	0	0	0	1	0	0	0	0	1	0	0	0	0	0	0
-0.986635	-0.162947	1	1	0	1	0	0	1	1	1	1	1	1	1	1	1	1	1	1	1	1	1	0	u	0	1	1	1	1	1	1	1	1	1	1	1	1	0	1	1	1	1	1	1	1	1	1	1	1
-0.0547704	0.998499	1	1	0	0	0	1	1	0	u	1	1	0	1	0	1	1	1	0	1	1	0	0	0	1	0	0	1	1	1	1	0	0	1	0	1	1	1	0	0	1	1	1	1	1	0	0	0	1
0.119976	-0.992777	0	0	0	0	0	0	0	1	0	0	0	0	0	1	0	0	0	1	0	0	0	0	0	0	0	1	0	0	0	0	0	0	0	0	0	0	0	1	0	0	0	0	0	0	1	0	0	0
0.139839	0.990174	0	1	0	0	0	0	0	0	0	0	0	0	0	0	0	1	0	0	0	1	0	0	0	0	0	0	0	0	0	0	0	0	0	0	0	0	1	0	0	0	0	1	0	0	0	0	0	0
-0.0445126	-0.999009	1	1	1	1	1	1	1	1	1	1	1	1	1	1	1	0	1	1	1	1	1	1	1	1	1	1	1	1	1	1	1	1	1	1	1	1	1	1	1	1	1	1	1	1	1	1	1	1
0.199774	0.979842	1	1	1	1	1	1	1	1	1	1	1	1	1	1	1	1	1	1	1	1	1	1	1	1	1	0	1	1	1	1	1	1	1	1	1	1	1	1	1	1	1	1	1	1	0	1	1	1
-0.999967	-0.00809245	1	1	0	0	0	0	1	1	1	1	1	1	1	0	1	1	1	1	1	u	1	0	0	0	1	1	1	1	1	1	1	1	1	1	1	1	0	1	1	1	1	1	1	1	1	1	1	1
-0.231752	0.972775	1	1	1	0	1	1	1	0	1	1	1	1	1	0	1	1	1	0	1	1	1	0	0	1	1	0	1	1	1	1	1	1	1	1	1	1	1	0	1	1	1	1	1	1	1	1	1	1
-0.374939	-0.927049	0	0	1	1	1	0	0	1	1	0	0	1	0	1	1	0	1	1	0	0	1	1	1	0	1	1	0	0	0	0	1	1	0	1	0	1	0	1	1	0	1	0	1	0	1	1	1	0
-0.108998	0.994042	1	1	1	0	1	1	1	0	1	1	1	1	1	0	1	1	1	0	1	1	1	0	0	1	1	0	1	1	1	1	1	1	1	1	1	1	1	0	1	1	1	1	1	1	0	1	1	1
-0.562103	-0.827067	1	0	1	1	1	0	1	1	1	1	0	1	1	1	1	0	1	1	0	0	1	1	1	0	1	1	0	1	0	1	1	1	0	1	0	1	0	1	1	1	1	0	1	0	1	1	1	1
0.419673	-0.907676	0	0	1	1	1	1	0	1	1	1	0	1	0	1	0	0	1	1	1	0	1	1	1	1	1	1	0	0	1	0	1	1	0	1	0	0	0	1	1	0	0	0	0	0	1	1	1	0
0.968587	0.248675	1	1	1	1	1	1	1	1	1	1	1	1	1	1	0	1	1	1	1	1	0	1	1	1	0	1	1	1	1	1	0	0	1	1	1	0	1	1	1	1	1	1	0	1	0	1	0	1
0.362053	0.932157	1	1	1	1	1	1	1	0	1	1	1	0	1	0	1	1	1	0	1	1	0	1	1	1	0	0	1	1	1	1	0	0	1	1	1	0	1	0	1	1	1	1	1	1	0	1	0	1
0.49193	-0.870635	1	1	1	1	1	1	1	1	1	1	1	1	1	1	1	0	1	1	1	1	1	1	1	1	1	1	1	0	1	0	1	1	0	1	1	1	1	1	1	0	1	1	1	1	1	1	1	1
0.98895	-0.148251	0	0	1	1	1	1	0	0	0	0	0	0	0	1	0	0	0	0	0	0	0	1	1	1	0	0	0	0	0	0	0	0	0	0	0	0	0	0	0	0	0	0	0	0	0	0	0	0
0.979536	0.201267	0	1	1	1	1	1	1	1	1	1	1	1	0	1	0	1	0	1	1	1	0	1	1	1	0	1	1	0	1	1	0	0	0	1	1	0	1	1	1	1	1	1	0	1	0	1	0	1
0.782156	-0.623082	0	0	1	1	1	0	0	0	0	0	0	0	0	1	0	0	0	0	0	0	0	1	1	0	0	0	0	0	0	0	0	0	0	0	0	0	0	1	0	0	0	0	0	0	0	0	0	0
-0.713795	-0.700355	1	0	1	1	1	0	1	1	1	1	1	1	1	1	1	1	1	1	1	0	1	1	1	0	1	1	1	1	1	1	1	1	1	1	1	1	0	1	1	1	1	0	1	1	1	1	1	1
-0.215492	0.976506	1	1	0	0	0	1	1	0	1	1	1	0	1	0	1	1	1	0	1	1	0	0	0	1	0	0	1	1	1	1	1	0	1	0	1	1	1	0	1	1	1	1	1	1	0	0	1	1
0.983766	0.179458	0	1	1	1	1	1	0	0	0	0	0	0	0	1	0	0	0	0	0	1	0	1	1	1	0	0	0	0	1	0	0	0	0	0	0	0	1	0	0	0	0	0	0	0	0	1	0	0
-0.591537	0.806278	1	1	0	0	0	1	1	0	1	1	1	0	1	0	1	1	1	0	1	1	1	0	0	1	1	0	1	1	1	1	1	1	1	0	1	1	1	0	1	1	1	1	1	1	1	0	1	1
0.3449	0.93864	0	1	0	0	0	1	0	0	0	0	1	0	0	0	0	1	0	0	0	1	0	0	0	1	0	0	1	1	0	u	0	0	1	0	1	0	1	0	0	u	0	1	0	1	0	0	0	0
0.992578	0.121613	1	1	1	1	1	1	1	1	1	1	1	1	1	1	1	1	1	1	1	1	1	1	1	1	1	1	1	1	1	1	0	0	1	1	1	0	1	1	1	1	1	1	0	1	0	1	0	1
-0.966041	0.258388	1	1	0	0	0	0	1	1	1	1	1	1	1	0	1	1	1	1	1	1	1	0	0	0	1	1	1	1	1	1	1	1	1	1	1	1	1	1	1	1	1	1	1	1	1	1	1	1
-0.297126	0.954838	0	0	0	0	0	0	0	0	0	0	0	0	0	0	0	1	0	0	0	0	0	0	0	0	0	0	0	0	0	0	0	0	0	0	0	0	0	0	0	0	0	0	0	0	0	0	0	0
-0.877108	-0.480293	1	0	0	0	0	0	1	1	1	0	0	1	1	0	1	1	1	1	0	0	1	0	0	0	1	1	1	1	0	1	1	1	1	1	0	1	0	1	1	1	1	0	1	1	1	0	1	1
0.285132	0.958488	0	0	0	0	0	0	0	0	0	0	0	0	0	0	0	0	0	0	0	0	0	0	0	0	0	0	0	0	0	0	0	0	0	0	0	0	1	0	0	0	0	0	0	0	0	0	0	0
0.203518	0.979071	1	1	0	0	0	1	1	0	1	1	1	0	1	0	1	1	1	0	1	1	0	0	0	1	0	0	1	1	1	1	0	0	1	0	1	0	1	0	1	1	1	1	1	1	0	1	0	1
0.727244	-0.686379	1	1	1	1	1	1	1	1	1	1	1	1	1	1	1	0	1	1	1	1	1	1	1	1	1	1	1	0	1	1	1	1	0	1	1	1	1	1	1	0	1	1	0	1	1	1	1	1
0.518368	0.855158	0	1	0	0	0	1	0	0	0	0	1	0	0	0	0	1	0	0	0	1	0	0	0	1	0	0	0	0	0	0	0	0	0	0	0	0	1	0	0	0	0	1	0	0	0	0	0	0
-0.922301	-0.386473	0	0	0	0	0	0	0	0	0	0	0	0	0	0	1	0	0	0	0	0	1	0	0	0	1	0	0	0	0	0	1	1	0	0	0	1	0	0	0	0	0	0	1	0	1	0	1	0
0.15655	-0.98767	0	0	1	1	1	0	0	1	1	1	0	1	0	1	0	0	0	1	0	0	1	1	1	0	1	1	0	0	0	0	1	1	0	1	0	0	0	1	1	0	0	0	0	0	1	1	1	0
0.985117	0.171883	0	1	1	1	1	1	0	1	1	1	1	1	0	1	0	0	0	1	1	1	0	1	1	1	0	0	1	0	1	0	0	0	0	1	1	0	1	1	1	0	0	1	0	1	0	1	0	0
-0.547777	-0.836625	1	0	1	1	1	0	1	1	1	1	1	1	1	1	1	0	1	1	1	0	1	1	1	0	1	1	1	1	1	1	1	1	1	1	1	1	0	1	1	1	1	0	1	1	1	1	1	1
-0.121454	-0.992597	1	0	1	1	1	0	0	1	1	1	0	1	1	1	1	0	1	1	1	0	1	1	1	0	1	1	0	0	1	0	1	1	0	1	0	1	0	1	1	0	1	0	1	0	1	1	1	1
0.966882	0.255224	0	1	1	1	1	1	0	1	1	1	1	1	0	1	0	1	0	1	1	1	0	1	1	1	0	0	1	0	1	0	0	0	0	1	1	0	1	1	1	0	0	1	0	1	0	1	0	0
0.873332	-0.487125	0	1	1	1	1	1	0	1	1	1	1	1	0	1	0	0	0	1	1	1	1	1	1	1	1	1	0	0	1	0	0	0	0	1	1	0	1	1	1	0	0	0	0	0	0	1	0	0
0.796461	0.60469	0	1	1	0	1	1	0	0	0	1	1	0	0	0	0	1	0	0	1	1	0	1	1	1	0	0	u	0	1	0	0	0	0	0	1	0	1	0	0	0	0	1	0	u	0	0	0	0
0.293713	-0.955894	0	0	1	1	1	0	0	1	0	1	0	1	0	1	0	0	0	1	0	0	1	1	1	0	1	1	0	0	0	0	0	1	0	1	0	0	0	1	1	0	0	0	0	0	1	1	0	0
-0.260098	-0.965582	1	0	1	1	1	1	1	1	1	1	1	1	1	1	1	0	1	1	1	0	1	1	1	1	1	1	1	1	1	1	1	1	1	1	1	1	0	1	1	1	1	0	1	1	1	1	1	1
0.456864	-0.889537	0	0	1	1	1	1	0	1	0	1	0	1	0	1	0	0	0	1	0	0	1	1	1	0	1	1	0	0	0	0	0	0	0	1	0	0	0	1	1	0	0	0	0	0	1	1	0	0
0.736498	-0.676439	0	0	1	1	1	1	0	1	0	0	0	0	0	1	0	0	0	1	0	0	0	1	1	1	0	1	0	0	0	0	0	0	0	1	0	0	0	1	0	0	0	0	0	0	0	1	0	0
-0.299876	-0.953978	0	0	0	1	0	0	0	1	0	0	0	1	0	1	0	0	0	1	0	0	1	1	0	0	1	1	0	0	0	0	1	1	0	0	0	1	0	1	0	0	0	0	0	0	1	0	1	0
0.558057	0.829803	0	0	0	0	0	0	0	0	0	0	0	0	0	0	0	0	0	0	0	0	0	0	0	0	0	0	0	0	0	0	0	0	0	0	0	0	0	0	0	0	0	0	0	0	0	0	0	0
-0.280065	0.959981	1	1	0	0	0	1	1	0	1	0	1	0	1	0	1	1	1	0	1	1	0	0	0	1	0	0	1	1	1	1	1	0	1	0	1	1	1	0	0	1	1	1	1	1	0	0	1	1
0.45756	0.889179	1	1	1	1	1	1	1	1	1	1	1	1	1	1	1	1	1	1	1	1	1	1	1	1	1	0	1	1	1	1	1	0	1	1	1	1	1	1	1	1	1	1	1	1	0	1	1	1
-0.517132	-0.855906	1	0	0	1	0	0	0	1	1	0	0	1	1	1	1	0	1	1	0	0	1	1	1	0	1	1	0	0	0	0	1	1	0	1	0	1	0	1	1	0	1	0	1	0	1	0	1	1
0.77042	-0.637537	1	1	1	1	1	1	1	1	1	1	1	1	1	1	1	0	1	1	1	1	1	1	1	1	1	1	1	0	1	1	1	1	0	1	1	1	1	1	1	1	1	1	u	1	1	1	1	1
-0.77339	0.63393	1	1	0	0	0	0	1	0	1	0	1	0	1	0	1	1	1	0	0	1	1	0	0	0	1	0	1	1	0	1	1	1	1	0	1	1	1	0	0	1	1	1	1	1	1	0	1	1
0.958426	0.28534	0	1	1	1	1	1	1	1	1	1	1	1	0	1	0	1	0	1	1	1	0	1	1	1	0	0	1	0	1	u	0	0	0	1	1	0	1	1	1	0	0	1	0	1	0	1	0	0
-0.0591135	0.998251	0	1	0	0	0	0	0	0	0	0	0	0	0	0	0	1	0	0	0	0	0	0	0	0	0	0	0	0	0	0	0	0	0	0	0	0	u	0	0	0	0	u	0	0	0	0	0	0
0.987723	-0.156217	0	1	1	1	1	1	0	1	1	1	1	1	0	1	0	0	0	1	1	1	0	1	1	1	0	1	1	0	1	0	0	0	0	1	1	0	1	1	1	0	0	1	0	1	0	1	0	0
-0.0913557	0.995818	1	1	0	0	0	1	1	0	0	0	1	0	1	0	0	1	0	0	1	1	0	0	0	1	0	0	1	1	1	1	0	0	1	0	1	0	1	0	0	1	1	1	1	1	0	0	0	1
0.371263	0.928528	0	1	0	0	0	0	0	0	0	0	0	0	0	0	0	0	0	0	0	1	0	0	0	0	0	0	0	0	0	0	0	0	0	0	0	0	1	0	0	0	0	1	0	0	0	0	0	0
0.494008	-0.869457	0	0	1	1	1	1	0	1	1	1	0	1	0	1	0	0	0	1	0	0	1	1	1	1	1	1	0	0	1	0	0	1	0	1	0	0	0	1	1	0	0	0	0	0	1	1	0	0
0.178884	0.98387	0	1	0	0	0	1	0	0	0	0	1	0	0	0	0	1	0	0	0	1	0	0	0	1	0	0	1	1	0	1	0	0	1	0	0	0	1	0	0	1	0	1	0	1	0	0	0	0
-0.211352	0.97741	0	0	0	0	0	0	0	0	0	0	0	0	0	0	0	1	0	0	0	0	0	0	0	0	0	0	0	0	0	0	0	0	0	0	0	0	0	0	0	0	0	0	0	0	0	0	0	0
-0.989887	0.141857	1	0	0	0	0	0	1	0	0	0	0	0	1	0	1	1	1	0	0	0	1	0	0	0	1	0	1	1	0	1	1	1	1	0	0	1	0	0	0	1	1	0	1	1	1	0	1	1
-0.774497	-0.632577	1	0	0	1	0	0	1	1	1	1	0	1	1	1	1	0	1	1	0	0	1	0	0	0	1	1	1	1	0	1	1	1	1	1	0	1	0	1	1	1	1	0	1	1	1	1	1	1
-0.41113	0.911577	1	1	1	1	1	1	1	1	1	1	1	1	1	0	1	1	1	1	1	1	1	1	1	1	1	1	1	1	1	1	1	1	1	1	1	1	1	1	1	1	1	1	1	1	1	1	1	1
-0.647043	0.762454	1	0	0	0	0	0	0	0	0	0	0	0	0	0	0	1	0	0	0	0	0	0	0	0	0	0	0	1	0	1	0	0	1	0	0	0	0	0	0	1	0	0	1	0	0	0	0	0
0.155116	-0.987896	0	0	1	1	1	0	0	1	0	0	0	1	0	1	0	0	0	1	0	0	1	1	1	0	1	1	0	0	0	0	0	1	0	1	0	0	0	1	0	0	0	0	0	0	1	1	0	0
-0.981233	-0.192825	1	0	0	0	0	0	1	1	1	0	1	1	1	0	1	1	1	1	0	0	1	0	0	0	1	1	1	1	0	1	1	1	1	0	1	1	0	1	1	1	1	0	1	1	1	0	1	1
-0.19926	0.979947	1	1	0	0	0	0	1	0	0	0	1	0	1	0	0	1	0	0	0	1	0	0	0	0	0	0	1	1	0	1	0	0	1	0	1	0	1	0	0	1	0	1	1	1	0	0	0	1
0.877079	-0.480346	0	0	1	1	1	1	0	1	0	1	0	1	0	1	0	0	0	1	1	0	0	1	1	1	0	1	0	0	1	0	0	0	0	1	0	0	0	1	0	0	0	0	0	0	0	1	0	0
-0.401132	0.91602	1	1	0	0	0	0	1	0	0	0	1	0	1	0	1	1	1	0	1	1	0	0	0	1	0	0	1	1	1	1	1	0	1	0	1	1	1	0	0	1	1	1	1	1	0	0	1	1
0.99895	0.045821	0	1	1	1	1	1	1	1	1	1	1	1	0	1	0	1	0	1	1	1	0	1	1	1	0	1	1	0	1	1	0	0	0	1	1	0	1	1	1	u	1	1	0	1	0	1	0	1
0.773691	0.633564	1	1	1	1	1	1	1	1	1	1	1	1	1	1	1	1	1	1	1	1	0	1	1	1	0	0	1	1	1	1	0	0	1	1	1	0	1	1	1	1	1	1	0	1	0	1	0	1
-0.996541	0.0830969	1	0	0	0	0	0	1	0	1	0	0	0	1	0	1	1	1	0	0	0	1	0	0	0	1	1	1	1	0	1	1	1	1	0	1	1	0	0	0	1	1	0	1	1	1	0	1	1
0.942346	-0.334639	0	1	1	1	1	1	0	1	1	1	1	1	0	1	0	0	0	1	1	1	0	1	1	1	0	1	0	0	1	0	0	0	0	1	1	0	1	1	1	0	0	1	0	0	0	1	0	0
0.895517	-0.445027	0	0	1	1	1	1	0	1	0	0	0	0	0	1	0	0	0	0	0	0	0	1	1	1	0	0	0	0	0	0	0	0	0	1	0	0	0	1	0	0	0	0	0	0	0	1	0	0
-0.356607	-0.934255	1	0	1	1	1	0	1	1	1	1	0	1	1	1	1	0	1	1	0	0	1	1	1	0	1	1	0	0	0	0	1	1	0	1	0	1	0	1	1	0	1	0	1	0	1	1	1	1
-0.577747	0.816216	0	0	0	0	0	0	0	0	0	0	0	0	0	0	0	1	0	0	0	0	0	0	0	0	0	0	0	0	0	0	0	0	1	0	0	0	0	0	0	0	0	0	0	0	0	0	0	0
0.612523	0.790453	1	1	1	1	1	1	1	0	1	1	1	0	1	1	0	1	1	0	1	1	0	1	1	1	0	0	1	1	1	1	0	0	1	1	1	0	1	0	1	1	1	1	0	1	0	1	0	1
0.0626573	-0.998035	0	0	0	0	0	0	0	0	0	0	0	0	0	0	0	0	0	1	0	0	0	0	0	0	0	1	0	0	0	0	0	0	0	0	0	0	0	1	0	0	0	0	0	0	0	0	0	0
0.0300094	-0.99955	0	0	1	1	1	0	0	1	1	1	0	1	0	1	0	0	0	1	0	0	1	1	1	0	1	1	0	0	0	0	1	1	0	1	0	1	0	1	1	0	0	0	0	0	1	1	1	0
-0.982346	-0.187073	1	0	0	0	0	0	1	0	0	0	0	0	1	0	1	1	1	0	0	0	1	0	0	0	1	1	0	1	0	1	1	1	1	0	0	1	0	0	0	1	1	0	1	0	1	0	1	1
0.214003	0.976833	1	1	1	1	1	1	1	1	1	1	1	1	1	1	1	1	1	0	1	1	1	1	1	1	1	0	1	1	1	1	1	u	1	1	1	1	1	u	1	1	1	1	1	1	0	1	1	1
0.712731	0.701437	0	1	0	0	0	1	0	0	0	0	0	0	0	0	0	0	0	0	0	1	0	0	0	1	0	0	0	0	0	0	0	0	0	0	0	0	1	0	0	0	0	0	0	0	0	0	0	0
-0.198869	-0.980026	0	0	1	1	1	0	0	1	0	0	0	1	0	1	0	0	0	1	0	0	1	1	1	0	1	1	0	0	0	0	1	1	0	1	0	1	0	1	0	0	0	0	0	0	1	0	1	0
-0.0989274	0.995095	1	1	0	0	0	0	1	0	0	0	1	0	0	0	0	1	0	0	0	1	0	0	0	0	0	0	1	1	0	1	0	0	1	0	1	0	1	0	0	1	0	1	0	1	0	0	0	0
-0.913013	0.407931	1	1	0	0	0	0	1	0	1	1	1	1	1	0	1	1	1	1	1	1	1	0	0	0	1	1	1	1	1	1	1	1	1	0	1	1	1	0	1	1	1	1	1	1	1	0	1	1
-0.274998	-0.961445	0	0	1	1	1	0	0	1	u	0	0	1	0	1	1	0	1	1	0	0	1	1	1	0	1	1	0	0	0	0	1	1	0	1	0	1	0	1	1	0	0	0	1	0	1	1	1	0
0.134058	0.990973	0	0	0	0	0	0	0	0	0	0	0	0	0	0	0	0	0	0	0	0	0	0	0	0	0	0	0	0	0	0	0	0	0	0	0	0	0	0	0	0	0	0	0	0	0	0	0	0
0.397789	-0.917477	0	0	1	1	1	1	0	1	1	1	0	1	0	1	1	0	1	1	1	0	1	1	1	1	1	1	0	0	1	0	1	1	0	1	0	1	0	1	1	0	1	0	0	0	1	1	1	1
0.701276	-0.71289	0	0	1	1	1	0	0	1	0	0	0	0	0	1	0	0	0	1	0	0	0	1	1	0	0	1	0	0	0	0	0	0	0	u	0	0	0	1	0	0	0	0	0	0	0	0	0	0
0.902045	0.431642	0	1	1	1	1	1	0	0	0	1	1	0	0	1	0	1	0	0	1	1	0	1	1	1	0	0	1	0	1	0	0	0	0	1	1	0	1	0	0	0	0	1	0	1	0	1	0	0
0.310529	-0.950564	0	0	1	1	1	1	0	1	1	1	0	1	0	1	1	0	1	1	1	0	1	1	1	1	1	1	0	0	1	0	1	1	0	1	1	1	0	1	1	0	1	0	1	0	1	1	1	1
0.918181	-0.396162	0	1	1	1	1	1	0	1	1	1	1	1	0	1	0	0	0	1	1	1	1	1	1	1	1	1	0	0	1	0	0	0	0	1	1	0	1	1	1	0	0	1	0	0	0	1	0	0
-0.977519	0.210847	1	1	0	0	0	0	1	1	1	1	1	1	1	0	1	1	1	1	1	1	1	0	0	0	1	1	1	1	1	1	1	1	1	1	1	1	1	1	1	1	1	1	1	1	1	1	1	1
0.425338	-0.905035	0	0	1	1	1	0	0	1	0	1	0	1	0	1	0	0	0	1	0	0	1	1	1	0	1	1	0	0	0	0	0	0	0	1	0	0	0	1	0	0	0	0	0	0	1	1	0	0
0.0377127	0.999289	0	0	0	0	0	0	0	0	0	0	0	0	0	0	0	1	0	0	0	0	0	0	0	0	0	0	0	0	0	0	0	0	0	0	0	0	0	0	0	0	0	0	0	0	0	0	0	0
0.988016	-0.154353	0	u	1	1	1	1	0	1	0	1	0	0	0	1	0	0	0	1	1	1	0	1	1	1	0	0	0	0	1	0	0	0	0	1	0	0	1	1	0	0	0	0	0	0	0	1	0	0
-0.862699	0.505719	1	1	0	0	0	0	1	u	1	1	1	1	1	0	1	1	1	1	1	1	1	0	0	0	1	1	1	1	1	1	1	1	1	1	1	1	1	0	1	1	1	1	1	1	1	1	1	1
-0.961499	-0.274808	0	0	0	0	0	0	0	0	0	0	0	0	0	0	0	0	0	0	0	0	0	0	0	0	0	0	0	0	0	0	0	1	0	0	0	0	0	0	0	0	0	0	0	0	1	0	0	0
-0.835566	0.54939	1	1	0	0	0	0	1	0	0	0	1	0	1	0	1	1	1	0	0	0	1	0	0	0	u	0	1	1	0	1	1	1	1	0	1	1	0	0	0	1	1	1	1	1	1	0	1	1
-0.263466	-0.964669	1	0	1	1	1	0	0	1	1	1	0	1	1	1	1	0	1	1	0	0	1	1	1	0	1	1	0	0	0	0	1	1	0	1	0	1	0	1	1	0	1	0	1	0	1	1	1	1
-0.297872	0.954606	1	1	0	0	0	0	1	0	0	0	1	0	1	0	1	1	1	0	1	1	0	0	0	u	0	0	1	1	0	1	0	0	1	0	1	1	1	0	0	1	1	1	1	1	0	0	0	1
-0.751	0.660303	1	1	0	0	0	0	1	0	0	0	1	0	1	0	1	1	1	0	0	1	1	0	0	0	1	0	1	1	0	1	1	1	1	0	1	1	1	0	0	1	1	1	1	1	1	0	1	1
-0.700163	0.713983	1	1	0	0	0	1	1	0	1	1	1	1	1	0	1	1	1	0	1	1	1	0	0	1	1	0	1	1	1	1	1	1	1	1	1	1	1	0	1	1	1	1	1	1	1	1	1	1
-0.284199	-0.958765	1	0	1	1	1	0	1	1	1	1	1	1	1	1	1	0	1	1	1	0	1	1	1	0	1	1	1	1	1	1	1	1	1	1	1	1	0	1	1	1	1	0	1	1	1	1	1	1
0.979918	0.199402	1	1	1	1	1	1	1	1	1	1	1	1	1	1	0	1	1	1	1	1	0	1	1	1	0	1	1	1	1	1	0	0	1	1	1	0	1	1	1	1	1	1	0	1	0	1	0	1
-0.563817	0.8259	1	1	0	0	0	0	1	0	0	0	1	0	1	0	1	1	1	0	0	1	0	0	0	0	0	0	1	1	0	1	1	0	1	0	1	1	1	0	0	1	1	1	1	1	0	0	1	1
-0.844589	0.535415	1	0	0	0	0	0	1	0	0	0	0	0	1	0	1	1	0	0	0	0	0	0	0	0	0	0	0	1	0	1	1	0	1	0	0	1	0	0	0	1	0	0	1	0	0	0	1	0
0.919079	-0.394074	1	1	1	1	1	1	1	1	1	1	1	1	1	1	1	1	1	1	1	1	1	1	1	1	1	1	1	0	1	1	1	1	0	1	1	0	1	1	1	1	1	1	0	1	1	1	1	1
0.763075	0.64631	1	1	1	1	1	1	1	1	1	1	1	1	1	1	1	1	1	1	1	1	1	1	1	1	1	1	1	1	1	1	0	0	1	1	1	0	1	1	1	1	1	1	1	1	0	1	0	1
0.489683	0.871901	1	1	1	1	1	1	1	0	1	1	1	0	1	u	0	1	1	0	1	1	0	1	1	1	0	0	1	1	1	1	0	0	1	1	1	0	1	0	1	1	1	1	0	1	0	1	0	1
0.0557699	-0.998444	0	0	0	0	0	0	0	1	0	0	0	0	0	1	0	0	0	1	0	0	0	u	0	0	0	1	0	0	0	0	0	0	0	0	0	0	0	1	0	0	0	0	0	0	1	0	0	0
-0.881132	-0.47287	1	0	0	1	1	0	1	1	1	1	1	1	1	1	1	1	1	1	1	0	1	1	1	0	1	1	1	1	1	1	1	1	1	1	1	1	0	1	1	1	1	0	1	1	1	1	1	1
0.24709	-0.968993	0	0	1	1	1	0	0	1	0	0	0	1	0	1	0	0	0	1	0	0	0	1	1	0	0	1	0	0	0	0	0	0	0	1	0	0	0	1	0	0	0	0	0	0	1	0	0	0
-0.604718	0.79644	1	1	0	0	0	1	1	1	1	1	1	1	1	0	1	1	1	1	1	1	1	0	0	1	1	1	1	1	1	1	1	1	1	1	1	1	1	0	1	1	1	1	1	1	1	1	1	1
-0.775523	0.63132	1	0	0	0	0	0	0	0	0	0	0	0	0	0	0	1	0	0	0	0	0	0	0	0	0	0	0	1	0	1	0	0	1	0	0	0	0	0	0	1	0	0	1	0	0	0	0	0
0.462826	-0.886449	0	0	1	1	1	0	0	1	0	0	0	1	0	1	0	0	0	1	0	0	0	1	1	0	0	1	0	0	0	0	0	0	0	1	0	0	0	1	0	0	0	0	0	0	0	u	0	0
-0.835208	0.549934	1	0	0	0	0	0	1	0	0	0	0	0	1	0	1	1	0	0	0	0	0	0	0	0	0	0	0	1	0	1	1	1	1	0	0	1	0	0	0	1	0	0	1	0	0	0	1	0
-0.313539	-0.949575	0	0	1	1	1	0	0	1	0	0	0	1	0	1	1	0	1	1	0	0	1	1	1	0	1	1	0	0	0	0	1	1	0	1	0	1	0	1	0	0	0	0	1	0	1	0	1	0
-0.730062	-0.683381	1	1	1	1	1	0	1	1	1	1	1	1	1	1	1	1	1	1	1	0	1	1	1	0	1	1	1	1	1	1	1	1	1	1	1	1	0	1	1	1	1	1	1	1	1	1	1	1
-0.932669	0.360732	1	1	0	0	0	0	1	1	1	1	1	1	1	0	1	1	1	1	1	1	1	0	0	u	1	1	1	1	1	1	1	1	1	1	1	1	1	1	1	1	1	1	1	1	1	1	1	1
-0.65816	-0.752878	1	0	1	1	1	0	1	1	1	1	1	1	1	1	1	1	1	1	1	0	1	1	1	0	1	1	1	1	1	1	1	1	1	1	1	1	0	1	1	1	1	0	1	1	1	1	1	1
-0.981772	0.190062	u	0	0	0	0	0	0	0	0	0	0	0	0	0	0	0	0	0	0	0	0	0	0	0	0	0	0	1	0	0	1	1	1	0	0	1	0	0	0	0	0	0	1	0	0	0	1	0
-0.54094	0.841061	1	1	0	0	0	0	1	0	1	0	1	0	1	0	1	1	1	0	1	1	u	0	0	0	0	0	1	1	1	1	1	1	1	0	1	1	1	0	u	1	1	1	1	1	0	0	1	1
0.97681	-0.214106	0	0	1	0	0	u	0	0	0	0	0	0	0	0	0	0	0	0	0	0	0	u	0	0	0	0	0	0	0	0	0	0	0	0	0	0	0	0	0	0	0	0	0	0	0	0	0	0
0.773742	0.633501	1	1	1	1	1	1	1	1	1	1	1	1	1	1	0	1	u	0	1	1	0	1	1	1	0	0	1	1	1	1	0	0	1	1	1	0	1	1	1	1	1	1	0	1	0	1	0	1
-0.968992	-0.247091	0	0	0	0	0	0	0	0	0	0	0	0	0	0	1	0	0	0	0	0	u	0	0	0	0	0	0	0	0	0	1	1	0	0	0	1	0	0	0	0	0	0	1	0	1	0	1	0
0.381354	0.924429	0	1	0	0	0	1	1	0	0	0	1	0	0	0	0	1	0	0	1	1	0	0	0	1	0	0	1	1	1	1	0	0	1	0	1	0	1	0	0	1	0	1	0	1	0	0	0	0
-0.992778	-0.119965	1	0	0	0	0	0	0	0	0	0	0	0	1	0	1	0	1	0	0	0	1	0	0	0	1	0	0	1	0	u	1	1	1	0	0	1	0	0	0	1	0	0	1	0	1	0	1	0
0.734092	-0.67905	0	0	1	0	1	0	0	0	0	0	0	0	0	1	0	0	0	0	0	0	0	1	1	0	0	0	0	0	0	0	0	0	0	0	0	0	0	0	0	0	0	0	0	0	0	0	0	0
-0.0385645	0.999256	1	1	1	1	1	1	1	1	1	1	1	1	1	1	1	1	1	0	1	1	1	1	1	1	1	0	1	1	1	1	1	1	1	1	1	1	1	1	1	1	1	1	1	1	1	1	1	1
0.959366	-0.282165	1	1	1	1	1	1	1	1	1	1	1	1	1	1	1	1	1	1	1	1	1	1	1	1	1	1	1	0	1	1	0	1	0	1	1	0	1	1	1	1	1	1	0	1	1	1	1	1
-0.1107	0.993854	1	1	0	0	0	1	1	0	1	1	1	0	1	0	1	1	1	0	1	1	0	0	0	1	0	0	1	1	1	1	1	0	1	0	1	1	1	0	1	1	1	1	1	1	0	0	1	1
0.143146	-0.989702	1	1	1	1	1	1	1	1	1	1	1	1	1	1	1	0	1	1	1	1	1	1	1	1	1	1	1	1	1	1	1	1	1	1	1	1	1	1	1	1	1	1	1	1	1	1	1	1
-0.983331	-0.181827	0	0	0	0	0	0	0	0	0	0	0	0	0	0	0	0	0	0	0	0	0	0	0	0	0	0	0	0	0	0	1	1	0	0	0	1	0	0	0	0	0	0	1	0	1	0	1	0
0.999373	-0.0354055	0	1	1	1	1	1	0	1	0	1	0	0	0	1	0	0	0	0	1	1	0	1	1	1	0	0	0	0	1	0	0	0	0	1	0	0	1	1	0	0	0	u	0	0	0	1	0	0
-0.479545	0.877517	1	1	0	0	0	1	1	0	1	1	1	1	1	0	1	1	1	0	1	1	1	0	0	1	1	0	1	1	1	1	1	1	1	1	1	1	1	0	1	1	1	1	1	1	1	1	1	1
0.967455	0.253043	0	1	1	1	1	1	0	1	1	1	1	0	0	1	0	0	0	0	1	1	0	1	1	1	0	0	1	0	1	0	0	0	0	1	1	0	1	1	1	0	0	1	0	1	0	1	0	0
0.284158	0.958777	1	1	0	0	0	1	1	0	0	1	1	0	1	0	0	1	0	0	1	1	0	0	0	1	0	0	1	1	1	1	0	0	1	0	1	0	1	0	0	1	0	1	0	1	0	0	0	1
-0.975846	0.218459	0	0	0	0	0	0	0	0	0	0	0	0	0	0	0	0	0	0	0	0	0	0	0	0	0	0	0	0	0	0	1	0	0	0	0	1	0	0	0	0	0	0	1	0	0	0	0	0
0.927999	-0.372583	1	1	1	1	1	1	1	1	1	1	1	1	1	1	1	1	1	1	1	1	1	1	1	1	1	1	1	1	1	1	1	1	1	1	1	1	1	1	1	1	1	1	u	1	1	1	1	1
0.540564	0.841303	0	1	0	0	0	1	0	0	0	0	1	0	0	0	0	1	0	0	1	1	0	0	0	1	0	0	1	1	1	1	0	0	1	0	1	0	1	0	0	1	0	1	0	1	0	0	0	0
0.999934	0.0115177	0	1	1	1	1	1	0	0	0	1	0	0	0	1	0	0	0	0	1	1	0	1	1	1	0	0	0	0	1	0	0	0	0	1	0	0	1	0	0	0	0	0	0	0	0	1	0	0
-0.884875	0.465829	1	1	0	1	u	1	1	1	1	1	1	1	1	0	1	1	1	1	1	1	1	0	u	1	1	1	1	1	1	1	1	1	1	1	1	1	1	1	1	1	1	1	1	1	1	1	1	1
0.816754	-0.576986	0	0	1	0	0	0	0	0	0	0	0	0	0	1	0	0	0	0	0	0	0	1	0	0	0	0	0	0	0	0	0	0	0	0	0	0	0	0	0	0	0	0	0	0	0	0	0	0
0.501229	-0.865315	0	0	1	1	1	1	0	1	1	1	1	1	0	1	1	0	1	1	1	0	1	1	1	1	1	1	0	0	1	0	1	1	0	1	1	1	0	1	1	0	1	0	0	0	1	1	1	1
0.725074	0.68867	1	1	1	1	1	1	1	1	1	1	1	1	1	1	1	1	1	1	1	1	1	1	1	1	1	1	1	1	1	1	u	0	1	1	1	1	1	1	1	1	1	1	1	1	0	1	1	1
0.908914	-0.416983	0	1	1	1	1	1	0	1	1	1	1	1	0	1	0	0	0	1	1	1	0	1	1	1	0	1	0	0	1	0	0	0	0	1	1	0	1	1	1	0	0	0	0	0	0	1	0	0
0.998785	0.0492702	0	1	1	1	1	1	0	1	1	1	1	1	0	1	0	0	0	1	1	1	0	1	1	1	0	0	0	0	1	0	0	0	0	1	1	0	1	1	1	0	0	1	0	0	0	1	0	0
0.461122	-0.887337	0	0	1	1	1	0	0	1	0	0	0	0	0	1	0	0	0	1	0	0	0	1	1	0	0	1	0	0	0	0	0	0	0	0	0	0	0	1	0	0	0	0	0	0	0	0	0	0
[truncated: 55 more columns]

## Sheet: 10
		0	1	2	3	4	5	6	7	8	9	10	11	12	13	14	15	16	17	18	19	20	21	22	23	24	25	26	27	28	29	30	31	32	33	34	35	36	37	38	39	40	41	42	43	44	45	46	47
-0.853154	-0.521659	1	0	0	0	0	0	0	0	0	0	0	0	1	0	1	0	1	1	0	0	1	0	0	0	1	1	0	0	0	0	1	1	0	0	0	1	0	0	0	0	0	0	1	0	1	0	1	0
-0.993395	0.114744	1	1	0	1	1	0	1	1	1	1	1	1	1	1	1	1	1	1	1	1	1	u	1	0	1	1	1	1	1	1	1	1	1	1	1	1	1	1	1	1	1	1	1	1	1	1	1	1
-0.775656	0.631156	1	1	0	0	0	0	1	0	0	0	0	0	1	0	1	1	1	0	0	0	0	0	0	0	0	0	1	1	0	1	1	1	1	0	0	1	0	0	0	1	u	1	1	1	0	0	1	1
0.892825	0.450404	0	1	1	1	1	1	0	0	0	1	1	0	0	1	0	0	0	0	1	1	0	1	1	1	0	0	0	0	1	0	0	0	0	0	1	0	1	0	0	0	0	1	0	0	0	1	0	0
0.661753	-0.749722	0	0	1	1	1	1	0	1	0	0	0	0	0	1	0	0	0	1	0	0	0	1	1	0	0	1	0	0	0	0	0	0	0	1	0	0	0	1	0	0	0	0	0	0	0	1	0	0
0.755804	-0.654798	0	u	1	1	1	1	0	1	1	1	1	1	0	1	0	0	u	1	1	1	1	1	1	1	1	1	0	0	1	0	0	1	0	1	1	0	1	1	1	0	1	0	0	0	1	1	0	0
-0.925281	-0.379283	1	0	0	0	0	0	1	1	1	0	0	1	1	0	1	1	1	1	0	0	1	0	0	0	1	1	1	1	0	1	1	1	1	0	0	1	0	1	1	1	1	0	1	1	1	0	1	1
-0.609215	-0.793005	1	0	0	1	0	0	u	1	1	0	0	1	1	1	1	0	1	1	0	0	1	1	1	0	1	1	0	0	0	0	1	1	0	1	0	1	0	1	1	0	1	0	1	0	1	u	1	1
-0.743892	-0.6683	1	0	0	1	0	0	1	1	1	0	0	1	1	1	1	0	1	1	0	0	1	0	0	0	1	1	0	1	0	1	1	1	1	1	0	1	0	1	1	1	1	0	1	0	1	u	1	1
0.998313	-0.0580601	0	0	1	u	1	1	0	0	0	0	0	0	0	1	0	0	0	0	0	0	0	1	1	1	0	0	0	0	0	0	0	0	0	0	0	0	0	0	0	0	0	0	0	0	0	0	0	0
-0.797942	-0.602734	1	0	0	0	0	0	1	1	1	0	0	1	1	1	1	0	1	1	0	0	1	0	0	0	1	1	0	1	0	1	1	1	1	1	0	1	0	1	1	1	1	0	1	0	1	0	1	1
0.1061	-0.994355	0	0	1	1	1	1	0	1	1	1	0	1	1	1	1	0	1	1	1	0	1	1	1	1	1	1	0	0	1	0	1	1	0	1	0	1	0	1	1	0	1	0	1	0	1	1	1	1
-0.881188	0.472766	1	0	0	0	0	0	1	0	0	0	0	0	1	0	1	1	1	0	0	0	0	0	0	0	0	0	1	1	0	1	1	1	1	0	0	1	0	0	0	1	u	0	1	1	0	0	1	1
0.730505	-0.682907	0	1	1	1	1	1	0	1	1	1	1	1	0	1	0	0	1	1	1	1	1	1	1	1	1	1	0	0	1	0	0	1	0	1	1	0	1	1	1	0	1	0	0	0	1	1	0	1
0.839147	0.543904	0	1	1	1	1	1	0	0	0	1	1	0	0	1	0	1	0	0	1	1	0	1	1	1	0	0	1	0	1	0	0	0	0	0	1	0	1	0	0	0	0	1	0	1	0	1	0	0
0.949548	0.313622	0	1	1	0	1	1	0	0	0	0	0	0	0	0	0	0	0	0	0	1	0	1	1	1	0	0	0	0	u	0	0	0	0	0	0	0	1	0	0	0	0	0	0	0	0	0	0	0
0.885481	0.464676	0	1	1	1	1	1	1	1	1	1	1	1	0	1	0	1	0	0	1	1	0	1	1	1	0	0	1	1	1	1	0	0	1	1	1	0	1	1	1	1	1	1	0	1	0	1	0	1
0.999592	0.0285473	0	1	1	1	1	1	0	1	0	1	1	0	0	1	0	0	0	0	1	1	0	1	1	1	0	0	0	0	1	0	0	0	0	1	0	0	1	1	0	0	0	1	0	0	0	1	0	0
-0.65339	0.757021	1	1	0	0	0	0	1	0	0	0	1	0	1	0	1	1	1	0	0	1	0	0	0	0	0	0	1	1	0	1	1	1	1	0	1	1	1	0	0	1	1	1	1	1	0	0	1	1
0.554947	0.831886	0	1	0	0	0	1	0	0	0	0	1	0	0	0	0	1	0	0	0	1	0	0	0	1	0	0	0	0	u	0	0	0	0	0	0	0	1	0	0	0	0	1	0	0	0	0	0	0
-0.652795	-0.757535	1	0	0	1	0	0	0	1	1	0	0	1	1	1	1	0	1	1	0	0	1	0	0	0	1	1	0	u	0	0	1	1	0	1	0	1	0	1	1	0	1	0	1	0	1	0	1	1
0.961308	0.275477	0	1	1	1	1	1	0	0	0	u	0	0	0	1	0	0	0	0	1	1	0	1	1	1	0	0	0	0	1	0	0	0	0	0	0	0	1	0	0	0	0	1	0	0	0	1	0	0
0.917184	-0.398464	0	1	1	1	1	1	0	1	1	1	1	1	0	1	0	0	0	1	1	1	1	1	1	1	1	1	1	0	1	0	0	0	0	1	1	0	1	1	1	0	1	1	0	1	1	1	0	1
0.863298	-0.504695	0	1	1	1	1	1	0	1	1	1	1	1	0	1	0	0	1	1	1	1	1	1	1	1	1	1	1	0	1	0	0	0	0	1	1	0	1	1	1	0	1	1	0	1	1	1	0	1
-0.481276	0.876569	1	1	0	0	0	1	1	0	1	1	1	0	1	0	1	1	1	0	1	1	1	0	0	1	u	0	1	1	1	1	1	1	1	0	1	1	1	0	1	1	1	1	1	1	0	0	1	1
-0.732846	-0.680395	1	0	0	1	u	0	1	1	1	1	0	1	1	1	1	0	1	1	0	0	1	1	1	0	1	1	1	1	0	1	1	1	1	1	0	1	0	1	1	1	1	0	1	u	1	1	1	1
-0.189704	0.981841	1	1	0	0	0	1	1	0	0	0	1	0	1	0	1	1	u	0	1	1	0	0	0	1	0	0	1	1	1	1	0	0	1	0	1	u	1	0	0	1	1	1	1	1	0	0	0	1
-0.945188	-0.326526	1	0	0	0	0	0	1	0	0	0	0	u	1	0	1	0	1	1	0	0	1	0	0	0	1	1	0	1	0	1	1	1	1	0	0	1	0	0	0	1	1	0	1	0	1	0	1	1
0.991422	0.130697	0	1	1	1	1	1	1	1	1	1	1	1	0	1	0	1	0	1	1	1	0	1	1	1	0	1	1	0	1	0	0	0	0	1	1	0	1	1	1	0	1	1	0	1	0	1	0	1
0.817048	0.576569	1	1	1	1	1	1	1	1	1	1	1	1	1	1	0	1	0	0	1	1	0	1	1	1	0	0	1	1	1	1	0	0	1	1	1	0	1	u	1	1	1	1	0	1	0	1	0	1
-0.939848	0.341594	1	0	0	0	0	0	u	0	0	0	0	0	1	0	1	1	0	0	0	0	0	0	0	0	0	0	0	1	0	1	1	1	1	0	0	1	0	0	0	1	0	0	1	0	0	0	1	0
-0.971666	0.236359	1	1	0	0	0	0	1	0	1	0	1	1	1	0	1	1	1	0	0	0	1	0	0	0	1	1	1	1	0	1	1	1	1	0	1	1	0	0	1	1	1	1	1	1	1	0	1	1
-0.19481	-0.980841	1	0	1	1	1	1	1	1	1	1	1	1	1	1	1	0	1	1	1	0	1	1	1	1	1	1	1	1	1	1	1	1	1	1	1	1	0	1	1	1	1	1	1	1	1	1	1	1
-0.466026	0.884771	1	1	0	0	0	0	1	0	0	0	1	0	1	0	1	1	1	0	0	1	0	0	0	0	0	0	1	1	0	1	1	0	1	0	1	1	1	0	0	1	1	1	1	1	0	0	1	1
0.722347	0.691531	0	1	0	0	0	1	0	0	0	0	1	0	0	0	0	1	0	0	u	1	0	0	0	1	0	0	0	0	1	0	0	0	0	0	0	0	1	0	0	0	0	1	0	0	0	0	0	0
0.536252	-0.844058	0	0	1	1	1	1	0	1	0	1	0	1	0	1	0	0	0	1	0	0	1	1	1	1	1	1	0	0	u	0	0	0	0	1	0	0	0	1	1	0	0	0	0	0	1	1	0	0
-0.917198	-0.398431	0	0	0	0	0	0	0	0	0	0	0	0	0	0	0	0	0	0	0	0	0	0	0	0	0	0	0	0	0	0	1	1	0	0	0	1	0	0	0	0	0	0	1	0	1	0	1	0
0.921798	-0.38767	0	1	1	1	1	1	1	1	1	1	1	1	0	1	0	0	1	1	1	1	1	1	1	1	1	1	1	0	1	0	0	0	0	1	1	0	1	1	1	0	1	1	0	1	1	1	0	1
-0.853389	-0.521275	1	0	0	0	0	0	0	0	0	0	0	1	1	0	1	0	1	1	0	0	1	0	0	0	1	1	0	1	0	0	1	1	u	0	0	1	0	1	0	0	1	0	1	0	1	0	1	1
0.953113	-0.302616	0	0	1	1	1	1	0	1	0	1	0	0	0	1	0	0	0	1	1	u	0	1	1	1	0	0	0	0	1	0	0	0	0	1	0	0	1	1	0	0	0	0	0	0	0	1	0	0
0.666456	-0.745545	1	1	1	1	1	1	1	1	1	1	1	1	1	1	1	0	1	1	1	1	1	1	1	1	1	1	1	0	1	1	1	1	0	1	1	1	1	1	1	1	1	1	1	1	1	1	1	1
0.984874	0.17327	0	0	1	0	u	1	0	0	0	0	0	0	0	0	0	0	0	0	0	0	0	u	0	1	0	0	0	0	0	0	0	0	0	0	0	0	u	0	0	0	0	0	0	0	0	0	0	0
-0.494477	0.869191	0	0	0	0	0	0	0	0	0	0	0	0	0	0	0	1	0	0	0	0	0	0	0	0	0	0	0	1	0	1	0	0	1	0	0	0	0	0	0	1	0	0	0	0	0	0	0	0
0.981048	-0.193765	0	0	1	1	1	1	0	1	0	1	0	0	0	1	0	0	0	0	1	1	0	1	1	1	0	0	0	0	1	0	0	0	0	1	0	0	1	1	0	0	0	0	0	0	0	1	0	0
-0.410173	0.912008	1	1	0	0	0	0	0	0	0	0	0	0	0	0	0	1	0	0	0	u	0	0	0	0	0	0	1	1	0	1	0	0	1	0	0	0	1	0	0	1	0	1	0	1	0	0	0	0
-0.674188	0.73856	1	1	0	0	0	0	1	0	0	0	1	0	1	0	1	1	1	0	0	1	0	0	0	0	0	0	1	1	0	1	1	1	1	0	1	1	1	0	0	1	1	1	1	1	0	0	1	1
0.316914	-0.948454	0	0	0	0	0	0	0	0	0	0	0	0	0	1	0	0	0	1	0	0	0	1	0	0	0	1	0	0	0	0	0	0	0	0	0	0	0	1	0	0	0	0	0	0	0	0	0	0
0.575159	-0.818042	0	0	1	1	1	1	0	1	0	1	0	1	0	1	0	0	0	1	0	0	0	1	1	1	0	1	0	0	0	0	0	0	0	1	0	0	0	1	0	0	0	0	0	0	1	1	0	0
-0.00185062	0.999998	1	1	0	0	0	1	1	0	1	1	1	0	1	0	1	1	1	0	1	1	0	0	0	1	0	0	1	1	1	1	1	0	1	1	1	1	1	0	1	1	1	1	1	1	0	1	1	1
0.426313	0.904576	1	1	1	1	1	1	1	1	1	1	1	1	1	1	1	1	1	0	1	1	0	1	1	1	0	0	1	1	1	1	0	0	1	1	1	1	1	0	1	1	1	1	1	1	0	1	0	1
0.998237	0.0593595	0	0	u	0	0	1	0	0	0	0	0	0	0	0	0	0	0	0	0	0	0	0	0	1	0	0	0	0	0	0	0	0	0	0	0	0	0	0	0	0	0	0	0	0	0	0	0	0
-0.950924	-0.309425	1	0	0	0	0	0	1	1	1	0	0	1	1	0	1	1	1	1	0	0	1	0	0	0	1	1	1	1	0	1	1	1	1	0	0	1	0	1	1	1	1	0	1	1	1	0	1	1
-0.758847	-0.651269	0	0	0	0	0	0	0	0	0	0	0	0	0	0	0	0	0	0	0	0	0	0	0	0	0	0	0	0	0	0	0	1	0	0	0	0	0	0	0	0	0	0	0	0	1	0	0	0
0.700473	0.713679	0	1	1	0	1	1	0	0	0	1	1	0	0	0	0	1	0	0	1	1	0	1	1	1	0	0	1	0	1	0	0	0	0	0	1	0	1	0	0	0	0	1	0	1	0	u	0	0
0.280601	-0.959824	0	0	1	1	1	0	0	1	1	1	0	1	0	1	0	0	0	1	0	0	1	1	1	0	1	1	0	0	0	0	0	1	0	1	0	0	0	1	1	0	0	0	0	0	1	1	0	0
0.563585	0.826058	0	1	1	0	1	1	1	0	0	1	1	0	0	0	0	1	0	0	1	1	0	0	0	1	0	0	1	1	1	1	0	0	1	0	1	0	1	0	0	1	0	1	0	1	0	0	0	0
0.54834	0.836255	1	1	1	1	1	1	1	0	1	1	1	0	1	0	0	1	0	0	1	1	0	1	1	1	0	0	1	1	1	1	0	0	1	u	1	0	1	0	1	1	1	1	0	1	0	1	0	1
-0.890924	-0.454153	1	0	0	0	0	0	1	1	1	0	0	1	1	0	1	0	1	1	0	0	1	0	0	0	1	1	0	1	0	1	1	1	1	0	0	1	0	1	1	1	1	0	1	0	1	0	1	1
0.987384	-0.158343	0	0	1	1	1	1	0	0	0	0	0	0	0	1	0	0	0	0	0	0	0	1	1	1	0	0	0	0	0	0	0	0	0	0	0	0	0	0	0	0	0	0	0	0	0	0	0	0
0.924513	-0.381151	0	0	1	1	1	1	0	1	1	1	0	1	0	1	0	0	0	1	1	1	0	1	1	1	0	1	0	0	1	0	0	0	0	1	0	0	1	1	1	0	0	0	0	0	0	1	0	0
0.686761	0.726884	1	1	1	1	1	1	1	1	1	1	1	1	1	1	1	1	1	1	1	1	0	1	1	1	0	0	1	1	1	1	0	0	1	1	1	0	1	1	1	1	1	1	1	1	0	1	0	1
-0.295675	-0.955289	1	0	1	1	1	1	1	1	1	1	1	1	1	1	1	1	1	1	1	0	1	1	1	1	1	1	1	1	1	1	1	1	1	1	1	1	0	1	1	1	1	1	1	1	1	1	1	1
0.622068	0.782964	0	1	0	0	0	1	0	0	0	0	1	0	0	0	0	1	0	0	0	1	0	0	0	1	0	0	0	0	u	0	0	0	0	0	0	0	1	0	0	0	0	1	0	0	0	0	0	0
0.956488	0.291772	0	1	1	1	1	1	1	1	1	1	1	1	0	1	0	1	0	1	1	1	0	1	1	1	0	1	1	u	1	1	0	0	1	1	1	0	1	1	1	1	1	1	0	1	0	1	0	1
0.422506	-0.90636	0	0	1	1	1	1	0	1	1	1	0	1	0	1	0	0	0	1	1	0	1	1	1	1	1	1	0	0	1	0	0	1	0	1	0	0	0	1	1	0	0	0	0	0	1	1	0	0
0.599701	0.800224	0	1	0	0	0	1	0	0	0	0	1	0	0	0	0	1	0	0	1	1	0	0	0	1	0	0	1	0	1	0	0	0	0	0	1	0	1	0	0	0	0	1	0	1	0	0	0	0
-0.521368	0.853332	1	1	0	0	0	0	1	0	0	0	1	0	1	0	1	1	1	0	0	1	0	0	0	0	0	0	1	1	0	1	1	0	1	0	1	1	1	0	0	1	1	1	1	1	0	0	1	1
0.445241	-0.895411	0	0	1	1	1	1	0	1	1	1	0	1	0	1	0	0	0	1	1	0	1	1	1	1	1	1	0	0	1	0	0	1	0	1	0	0	0	1	1	0	0	0	0	0	1	1	1	0
-0.555545	-0.831487	1	0	1	1	1	0	1	1	1	1	1	1	1	1	1	1	1	1	1	0	1	1	1	0	1	1	1	1	1	1	1	1	1	1	1	1	0	1	1	1	1	0	1	1	1	1	1	1
-0.941828	-0.336094	0	0	0	0	0	0	0	0	0	0	0	0	0	0	1	0	0	0	0	0	1	0	0	0	1	0	0	0	0	0	1	1	0	0	0	1	0	0	0	0	0	0	1	0	1	0	1	0
-0.067343	0.99773	1	1	0	0	0	1	1	0	0	0	1	0	1	0	0	1	0	0	0	1	0	0	0	1	0	0	1	1	0	1	0	0	1	0	1	0	1	0	0	1	0	1	0	1	0	0	0	u
-0.434087	0.900871	1	1	0	0	0	0	1	0	0	0	1	0	1	0	0	1	0	0	0	1	0	0	0	0	0	0	1	1	0	1	0	0	1	0	u	0	1	0	0	1	0	1	1	1	0	0	0	u
-0.182913	-0.983129	1	0	1	1	1	0	1	1	1	1	0	1	1	1	1	0	1	1	1	0	1	1	1	0	1	1	0	0	1	u	1	1	0	1	1	1	0	1	1	u	1	0	1	0	1	1	1	1
0.29013	0.956987	1	1	u	0	u	1	1	0	1	1	1	0	1	0	0	1	u	0	1	1	0	0	0	1	0	0	1	1	1	1	0	0	1	0	1	0	1	0	1	1	1	1	0	1	0	1	0	1
0.119567	-0.992826	1	0	1	1	1	1	1	1	1	1	u	1	1	1	1	0	1	1	1	0	1	1	1	1	1	1	0	0	1	0	1	1	0	1	1	1	0	1	1	0	1	0	1	0	1	1	1	1
0.245134	0.969489	0	1	0	0	0	1	0	0	0	0	1	0	0	0	0	1	0	0	0	1	0	0	0	1	0	0	0	0	0	0	0	0	1	0	0	0	1	0	0	0	0	1	0	u	0	0	0	0
-0.990561	0.137074	1	0	0	0	0	0	0	0	0	0	0	0	1	0	1	0	0	0	0	0	0	0	0	0	0	0	0	1	0	0	1	1	1	0	0	1	0	0	0	0	0	0	1	0	1	0	1	0
0.926126	0.377214	0	1	1	0	u	1	0	0	0	0	0	0	0	0	0	0	0	0	0	1	0	0	0	1	0	0	0	0	0	0	0	0	0	0	0	0	1	0	0	0	0	0	0	0	0	0	0	0
0.87368	0.486502	1	1	1	1	1	1	1	1	1	1	1	1	1	1	1	1	1	1	1	1	1	1	1	1	1	1	1	1	1	1	0	0	1	1	1	0	1	1	1	1	1	1	0	1	0	1	0	1
-0.594773	-0.803894	0	0	0	0	0	0	0	0	0	0	0	0	0	0	0	0	0	1	0	0	1	0	0	0	1	1	0	0	0	0	1	1	0	0	0	1	0	1	0	0	0	0	1	0	1	0	1	0
-0.477192	-0.878799	1	0	1	1	1	0	0	1	1	0	0	1	1	1	1	0	1	1	0	0	1	1	1	0	1	1	0	0	0	0	1	1	0	1	0	1	0	1	1	0	1	0	1	0	1	1	1	1
0.658734	0.752376	0	1	0	0	0	1	0	0	0	0	1	0	0	0	0	1	0	0	1	1	0	0	0	1	0	0	1	0	1	0	0	0	0	0	1	0	1	0	0	0	0	1	0	1	0	0	0	0
0.655263	-0.7554	0	0	1	1	1	1	0	1	0	1	0	1	0	1	0	0	0	1	0	0	0	1	1	1	0	1	0	0	0	0	0	0	0	1	0	0	0	1	0	0	0	0	0	0	0	1	0	0
0.194143	0.980973	0	1	0	0	0	0	0	0	0	0	0	0	0	0	0	1	0	0	0	1	0	0	0	0	0	0	0	0	0	0	0	0	0	0	0	0	1	0	0	0	0	1	0	0	0	0	0	0
0.132028	-0.991246	0	0	1	1	1	0	0	1	0	0	0	1	0	1	0	0	0	1	0	0	0	1	1	0	u	1	0	0	0	0	0	u	0	0	0	0	0	1	0	0	0	0	0	0	1	0	0	0
0.859262	0.511536	1	1	1	1	1	1	1	1	1	1	1	1	1	1	0	1	u	1	1	1	0	1	1	1	0	0	1	1	1	1	0	0	1	1	1	0	1	1	1	1	1	1	0	1	0	1	0	1
0.269462	0.963011	0	1	0	0	0	0	0	0	0	0	0	0	0	0	0	1	0	0	0	1	0	0	0	0	0	0	0	0	0	0	0	0	0	0	0	0	1	0	0	0	0	1	0	0	0	0	0	0
-0.986635	-0.162947	1	1	0	1	0	0	1	1	1	1	1	1	1	1	1	1	1	1	1	1	1	0	u	0	1	1	1	1	1	1	1	1	1	1	1	1	0	1	1	1	1	1	1	1	1	1	1	1
-0.0547704	0.998499	1	1	0	0	0	1	1	0	u	1	1	0	1	0	1	1	1	0	1	1	0	0	0	1	0	0	1	1	1	1	0	0	1	0	1	1	1	0	0	1	1	1	1	1	0	0	0	1
0.119976	-0.992777	0	0	0	0	0	0	0	1	0	0	0	0	0	1	0	0	0	1	0	0	0	0	0	0	0	1	0	0	0	0	0	0	0	0	0	0	0	1	0	0	0	0	0	0	1	0	0	0
0.139839	0.990174	0	1	0	0	0	0	0	0	0	0	0	0	0	0	0	1	0	0	0	1	0	0	0	0	0	0	0	0	0	0	0	0	0	0	0	0	1	0	0	0	0	1	0	0	0	0	0	0
-0.0445126	-0.999009	1	1	1	1	1	1	1	1	1	1	1	1	1	1	1	0	1	1	1	1	1	1	1	1	1	1	1	1	1	1	1	1	1	1	1	1	1	1	1	1	1	1	1	1	1	1	1	1
0.199774	0.979842	1	1	1	1	1	1	1	1	1	1	1	1	1	1	1	1	1	1	1	1	1	1	1	1	1	0	1	1	1	1	1	1	1	1	1	1	1	1	1	1	1	1	1	1	0	1	1	1
-0.999967	-0.00809245	1	1	0	0	0	0	1	1	1	1	1	1	1	0	1	1	1	1	1	u	1	0	0	0	1	1	1	1	1	1	1	1	1	1	1	1	0	1	1	1	1	1	1	1	1	1	1	1
-0.231752	0.972775	1	1	1	0	1	1	1	0	1	1	1	1	1	0	1	1	1	0	1	1	1	0	0	1	1	0	1	1	1	1	1	1	1	1	1	1	1	0	1	1	1	1	1	1	1	1	1	1
-0.374939	-0.927049	0	0	1	1	1	0	0	1	1	0	0	1	0	1	1	0	1	1	0	0	1	1	1	0	1	1	0	0	0	0	1	1	0	1	0	1	0	1	1	0	1	0	1	0	1	1	1	0
-0.108998	0.994042	1	1	1	0	1	1	1	0	1	1	1	1	1	0	1	1	1	0	1	1	1	0	0	1	1	0	1	1	1	1	1	1	1	1	1	1	1	0	1	1	1	1	1	1	0	1	1	1
-0.562103	-0.827067	1	0	1	1	1	0	1	1	1	1	0	1	1	1	1	0	1	1	0	0	1	1	1	0	1	1	0	1	0	1	1	1	0	1	0	1	0	1	1	1	1	0	1	0	1	1	1	1
0.419673	-0.907676	0	0	1	1	1	1	0	1	1	1	0	1	0	1	0	0	1	1	1	0	1	1	1	1	1	1	0	0	1	0	1	1	0	1	0	0	0	1	1	0	0	0	0	0	1	1	1	0
0.968587	0.248675	1	1	1	1	1	1	1	1	1	1	1	1	1	1	0	1	1	1	1	1	0	1	1	1	0	1	1	1	1	1	0	0	1	1	1	0	1	1	1	1	1	1	0	1	0	1	0	1
0.362053	0.932157	1	1	1	1	1	1	1	0	1	1	1	0	1	0	1	1	1	0	1	1	0	1	1	1	0	0	1	1	1	1	0	0	1	1	1	0	1	0	1	1	1	1	1	1	0	1	0	1
0.49193	-0.870635	1	1	1	1	1	1	1	1	1	1	1	1	1	1	1	0	1	1	1	1	1	1	1	1	1	1	1	0	1	u	1	1	0	1	1	1	1	1	1	0	1	1	1	1	1	1	1	1
0.98895	-0.148251	0	0	1	1	1	1	0	0	0	0	0	0	0	1	0	0	0	0	0	0	0	1	1	1	0	0	0	0	0	0	0	0	0	0	0	0	0	0	0	0	0	0	0	0	0	0	0	0
0.979536	0.201267	0	1	1	1	1	1	1	1	1	1	1	1	0	1	0	1	0	1	1	1	0	1	1	1	0	1	1	0	1	1	0	0	0	1	1	0	1	1	1	1	1	1	0	1	0	1	0	1
0.782156	-0.623082	0	0	1	1	1	0	0	0	0	0	0	0	0	1	0	0	0	0	0	0	0	1	1	0	0	0	0	0	0	0	0	0	0	0	0	0	0	1	0	0	0	0	0	0	0	0	0	0
-0.713795	-0.700355	1	0	1	1	1	0	1	1	1	1	1	1	1	1	1	1	1	1	1	0	1	1	1	0	1	1	1	1	1	1	1	1	1	1	1	1	0	1	1	1	1	0	1	1	1	1	1	1
-0.215492	0.976506	1	1	0	0	0	1	1	0	1	1	1	0	1	0	1	1	1	0	1	1	0	0	0	1	0	0	1	1	1	1	1	0	1	0	1	1	1	0	1	1	1	1	1	1	0	0	1	1
0.983766	0.179458	0	1	1	1	1	1	0	0	0	0	0	0	0	1	0	0	0	0	0	1	0	1	1	1	0	0	0	0	1	0	0	0	0	0	0	0	1	0	0	0	0	0	0	0	0	1	0	0
-0.591537	0.806278	1	1	0	0	0	1	1	0	1	1	1	0	1	0	1	1	1	0	1	1	1	0	0	1	1	0	1	1	1	1	1	1	1	0	1	1	1	0	1	1	1	1	1	1	1	0	1	1
0.3449	0.93864	0	1	0	0	0	1	0	0	0	0	1	0	0	0	0	1	0	0	0	1	0	0	0	1	0	0	1	1	0	u	0	0	1	0	1	0	1	0	0	u	0	1	0	1	0	0	0	0
0.992578	0.121613	1	1	1	1	1	1	1	1	1	1	1	1	1	1	1	1	1	1	1	1	1	1	1	1	1	1	1	1	1	1	0	0	1	1	1	0	1	1	1	1	1	1	0	1	0	1	0	1
-0.966041	0.258388	1	1	0	0	0	0	1	1	1	1	1	1	1	0	1	1	1	1	1	1	1	0	0	0	1	1	1	1	1	1	1	1	1	1	1	1	1	1	1	1	1	1	1	1	1	1	1	1
-0.297126	0.954838	0	0	0	0	0	0	0	0	0	0	0	0	0	0	0	1	0	0	0	0	0	0	0	0	0	0	0	0	0	0	0	0	0	0	0	0	0	0	0	0	0	0	0	0	0	0	0	0
-0.877108	-0.480293	1	0	0	0	0	0	1	1	1	0	0	1	1	0	1	1	1	1	0	0	1	0	0	0	1	1	1	1	0	1	1	1	1	1	0	1	0	1	1	1	1	0	1	1	1	0	1	1
0.285132	0.958488	0	0	0	0	0	0	0	0	0	0	0	0	0	0	0	0	0	0	0	0	0	0	0	0	0	0	0	0	0	0	0	0	0	0	0	0	1	0	0	0	0	0	0	0	0	0	0	0
0.203518	0.979071	1	1	0	0	0	1	1	0	1	1	1	0	1	0	1	1	1	0	1	1	0	0	0	1	0	0	1	1	1	1	0	0	1	0	1	0	1	0	1	1	1	1	1	1	0	1	0	1
0.727244	-0.686379	u	1	1	1	1	1	1	1	1	1	1	1	1	1	1	0	1	1	1	1	1	1	1	1	1	1	1	0	1	u	1	1	0	1	1	1	1	1	1	0	1	1	0	1	1	1	1	1
0.518368	0.855158	0	1	0	0	0	1	0	0	0	0	1	0	0	0	0	1	0	0	0	1	0	0	0	1	0	0	0	0	0	0	0	0	0	0	0	0	1	0	0	0	0	1	0	0	0	0	0	0
-0.922301	-0.386473	0	0	0	0	0	0	0	0	0	0	0	0	0	0	1	0	u	0	0	0	1	0	0	0	1	0	0	0	0	0	1	1	0	0	0	1	0	0	0	0	0	0	1	0	1	0	1	0
0.15655	-0.98767	0	0	1	1	1	0	0	1	1	1	0	1	0	1	0	0	0	1	0	0	1	1	1	0	1	1	0	0	0	0	1	1	0	1	0	0	0	1	1	0	0	0	0	0	1	1	1	0
0.985117	0.171883	0	1	1	1	1	1	0	1	1	1	1	1	0	1	0	0	0	1	1	1	0	1	1	1	0	0	1	0	1	0	0	0	0	1	1	0	1	1	1	0	0	1	0	1	0	1	0	0
-0.547777	-0.836625	1	0	1	1	1	0	1	1	1	1	1	1	1	1	1	0	1	1	1	0	1	1	1	0	1	1	1	1	1	1	1	1	1	1	1	1	0	1	1	1	1	0	1	1	1	1	1	1
-0.121454	-0.992597	1	0	1	1	1	0	0	1	1	1	0	1	1	1	1	0	1	1	1	0	1	1	1	0	1	1	0	0	1	0	1	1	0	1	0	1	0	1	1	0	1	0	1	0	1	1	1	1
0.966882	0.255224	0	1	1	1	1	1	0	1	1	1	1	1	0	1	0	1	0	1	1	1	0	1	1	1	0	0	1	0	1	0	0	0	0	1	1	0	1	1	1	0	0	1	0	1	0	1	0	0
0.873332	-0.487125	0	1	1	1	1	1	0	1	1	1	1	1	0	1	0	0	0	1	1	1	1	1	1	1	1	1	0	0	1	0	0	0	0	1	1	0	1	1	1	0	0	0	0	0	0	1	0	0
0.796461	0.60469	0	1	1	u	1	1	0	0	0	u	1	0	0	0	0	1	0	0	1	1	0	1	1	1	0	0	u	0	1	0	0	0	0	0	1	0	1	0	0	0	0	1	0	u	0	0	0	0
0.293713	-0.955894	0	0	1	1	1	0	0	1	0	1	0	1	0	1	0	0	0	1	0	0	1	1	1	0	1	1	0	0	0	0	0	1	0	1	0	0	0	1	1	0	0	0	0	0	1	1	0	0
-0.260098	-0.965582	1	0	1	1	1	1	1	1	1	1	1	1	1	1	1	0	1	1	1	0	1	1	1	1	1	1	1	1	1	1	1	1	1	1	1	1	0	1	1	1	1	0	1	1	1	1	1	1
0.456864	-0.889537	0	0	1	1	1	1	0	1	0	1	0	1	0	1	0	0	0	1	0	0	1	1	1	u	1	1	0	0	0	0	0	0	0	1	0	0	0	1	1	0	0	0	0	0	1	1	0	0
0.736498	-0.676439	0	0	1	1	1	1	0	1	0	0	0	0	0	1	0	0	0	1	0	0	0	1	1	1	0	1	0	0	0	0	0	0	0	1	0	0	0	1	0	0	0	0	0	0	0	1	0	0
-0.299876	-0.953978	0	0	0	1	0	0	0	1	0	0	0	1	0	1	0	0	0	1	0	0	1	1	0	0	1	1	0	0	0	0	1	1	0	0	0	1	0	1	0	0	0	0	0	0	1	0	1	0
0.558057	0.829803	0	0	0	0	0	0	0	0	0	0	0	0	0	0	0	0	0	0	0	0	0	0	0	0	0	0	0	0	0	0	0	0	0	0	0	0	0	0	0	0	0	0	0	0	0	0	0	0
-0.280065	0.959981	1	1	0	0	0	1	1	0	1	0	1	0	1	0	1	1	1	0	1	1	0	0	0	1	0	0	1	1	1	1	1	0	1	0	1	1	1	0	0	1	1	1	1	1	0	0	1	1
0.45756	0.889179	1	1	1	1	1	1	1	1	1	1	1	1	1	1	1	1	1	1	1	1	1	1	1	1	1	0	1	1	1	1	1	0	1	1	1	1	1	1	1	1	1	1	1	1	0	1	1	1
-0.517132	-0.855906	1	0	0	1	0	0	0	1	1	0	0	1	1	1	1	0	1	1	0	0	1	1	1	0	1	1	0	0	0	0	1	1	0	1	0	1	0	1	1	0	1	0	1	0	1	u	1	1
0.77042	-0.637537	1	1	1	1	1	1	1	1	1	1	1	1	1	1	1	0	1	1	1	1	1	1	1	1	1	1	1	0	1	1	1	1	0	1	1	1	1	1	1	1	1	1	u	1	1	1	1	1
-0.77339	0.63393	1	1	0	0	0	0	1	0	1	0	1	0	1	0	1	1	1	0	0	1	1	0	0	0	1	0	1	1	0	1	1	1	1	0	1	1	1	0	0	1	1	1	1	1	1	0	1	1
0.958426	0.28534	0	1	1	1	1	1	1	1	1	1	1	1	0	1	0	1	0	1	1	1	0	1	1	1	0	0	1	0	1	u	0	0	0	1	1	0	1	1	1	0	0	1	0	1	0	1	0	0
-0.0591135	0.998251	0	1	0	0	0	0	0	0	0	0	0	0	0	0	0	1	0	0	0	0	0	0	0	0	0	0	0	0	0	0	0	0	0	0	0	0	u	0	0	0	0	u	0	0	0	0	0	0
0.987723	-0.156217	0	1	1	1	1	1	0	1	1	1	1	1	0	1	0	0	0	1	1	1	0	1	1	1	0	1	1	0	1	0	0	0	0	1	1	0	1	1	1	0	0	1	0	1	0	1	0	0
-0.0913557	0.995818	1	1	0	0	0	1	1	0	0	0	1	0	1	0	0	1	0	0	1	1	0	0	0	1	0	0	1	1	1	1	0	0	1	0	1	0	1	0	0	1	1	1	1	1	0	0	0	1
0.371263	0.928528	0	1	0	0	0	0	0	0	0	0	0	0	0	0	0	0	0	0	0	1	0	0	0	0	0	0	0	0	0	0	0	0	0	0	0	0	1	0	0	0	0	u	0	0	0	0	0	0
0.494008	-0.869457	0	0	1	1	1	1	0	1	1	1	0	1	0	1	0	0	0	1	0	0	1	1	1	1	1	1	0	0	1	0	0	1	0	1	0	0	0	1	1	0	0	0	0	0	1	1	0	0
0.178884	0.98387	0	1	0	0	0	1	0	0	0	0	1	0	0	0	0	1	0	0	0	1	0	0	0	1	0	0	1	1	0	1	0	0	1	0	u	0	1	0	0	1	0	1	0	1	0	0	0	0
-0.211352	0.97741	0	0	0	0	0	0	0	0	0	0	0	0	0	0	0	1	0	0	0	0	0	0	0	0	0	0	0	0	0	0	0	0	0	0	0	0	0	0	0	0	0	0	0	0	0	0	0	0
-0.989887	0.141857	1	0	0	0	0	0	1	0	0	0	0	0	1	0	1	1	1	0	0	0	1	0	0	0	1	0	1	1	0	1	1	1	1	0	0	1	0	0	0	1	1	0	1	1	1	0	1	1
-0.774497	-0.632577	1	0	0	1	0	0	1	1	1	1	0	1	1	1	1	0	1	1	0	0	1	0	0	0	1	1	u	1	0	1	1	1	1	1	0	1	0	1	1	1	1	0	1	u	1	1	1	1
-0.41113	0.911577	1	1	1	1	1	1	1	1	1	1	1	1	1	0	1	1	1	1	1	1	1	1	1	1	1	1	1	1	1	1	1	1	1	1	1	1	1	1	1	1	1	1	1	1	1	1	1	1
-0.647043	0.762454	1	0	0	0	0	0	0	0	0	0	0	0	u	0	0	1	0	0	0	0	0	0	0	0	0	0	0	1	0	1	0	0	1	0	0	0	0	0	0	1	0	0	1	0	0	0	0	0
0.155116	-0.987896	0	0	1	1	1	0	0	1	0	0	0	1	0	1	0	0	0	1	0	0	1	1	1	0	1	1	0	0	0	0	0	1	0	1	0	0	0	1	0	0	0	0	0	0	1	1	0	0
-0.981233	-0.192825	1	0	0	0	0	0	1	1	1	0	1	1	1	0	1	1	1	1	0	0	1	0	0	0	1	1	1	1	0	1	1	1	1	u	1	1	0	1	1	1	1	0	1	1	1	0	1	1
-0.19926	0.979947	1	1	0	0	0	0	1	0	0	0	1	0	1	0	0	1	0	0	0	1	0	0	0	0	0	0	1	1	0	1	0	0	1	0	1	0	1	0	0	1	0	1	1	1	0	0	0	1
0.877079	-0.480346	0	0	1	1	1	1	0	1	0	1	0	1	0	1	0	0	0	1	1	0	0	1	1	1	0	1	0	0	1	0	0	0	0	1	0	0	0	1	0	0	0	0	0	0	0	1	0	0
-0.401132	0.91602	1	1	0	0	0	0	1	0	u	0	1	0	1	0	1	1	1	0	1	1	0	0	0	1	0	0	1	1	1	1	1	0	1	0	1	1	1	0	0	1	1	1	1	1	0	0	1	1
0.99895	0.045821	0	1	1	1	1	1	1	1	1	1	1	1	0	1	0	1	0	1	1	1	0	1	1	1	0	1	1	0	1	1	0	0	0	1	1	0	1	1	1	u	1	1	0	1	0	1	0	1
0.773691	0.633564	1	1	1	1	1	1	1	1	1	1	1	1	1	1	1	1	1	1	1	1	0	1	1	1	0	0	1	1	1	1	0	0	1	1	1	0	1	1	1	1	1	1	0	1	0	1	0	1
-0.996541	0.0830969	1	0	0	0	0	0	1	0	1	0	0	0	1	0	1	1	1	0	0	0	1	0	0	0	1	1	1	1	0	1	1	1	1	0	1	1	0	0	0	1	1	0	1	1	1	0	1	1
0.942346	-0.334639	0	1	1	1	1	1	0	1	1	1	1	1	0	1	0	0	0	1	1	1	0	1	1	1	0	1	0	0	1	0	0	0	0	1	1	0	1	1	1	0	0	1	0	0	0	1	0	0
0.895517	-0.445027	0	0	1	1	1	1	0	1	0	0	0	0	0	1	0	0	0	u	0	0	0	1	1	1	0	0	0	0	0	0	0	0	0	1	0	0	0	1	0	0	0	0	0	0	0	1	0	0
-0.356607	-0.934255	1	0	1	1	1	0	1	1	1	1	0	1	1	1	1	0	1	1	0	0	1	1	1	0	1	1	0	0	0	0	1	1	0	1	0	1	0	1	1	0	1	0	1	0	1	1	1	1
-0.577747	0.816216	0	0	0	0	0	0	0	0	0	0	0	0	0	0	0	1	0	0	0	0	0	0	0	0	0	0	0	0	0	0	0	0	1	0	0	0	0	0	0	0	0	0	0	0	0	0	0	0
0.612523	0.790453	1	1	1	1	1	1	1	0	1	1	1	0	1	1	0	1	1	0	1	1	0	1	1	1	0	0	1	1	1	1	0	0	1	1	1	0	1	0	1	1	1	1	0	1	0	1	0	1
0.0626573	-0.998035	0	0	0	0	0	0	0	0	0	0	0	0	0	0	0	0	0	1	0	0	0	0	0	0	0	1	0	0	0	0	0	0	0	0	0	0	0	1	0	0	0	0	0	0	0	0	0	0
0.0300094	-0.99955	0	0	1	1	1	0	0	1	1	1	0	1	0	1	0	0	0	1	0	0	1	1	1	0	1	1	0	0	0	0	1	1	0	1	0	1	0	1	1	0	0	0	0	0	1	1	1	0
-0.982346	-0.187073	1	0	0	0	0	0	1	0	0	0	0	0	1	0	1	1	1	0	0	0	1	0	0	0	1	1	0	1	0	1	1	1	1	0	0	1	0	0	0	1	1	0	1	0	1	0	1	1
0.214003	0.976833	1	1	1	1	1	1	1	1	1	1	1	1	1	1	1	1	1	0	1	1	1	1	1	1	1	0	1	1	1	1	1	u	1	1	1	1	1	u	1	1	1	1	1	1	0	1	1	1
0.712731	0.701437	0	1	0	0	0	1	0	0	0	0	0	0	0	0	0	0	0	0	0	1	0	0	0	1	0	0	0	0	0	0	0	0	0	0	0	0	1	0	0	0	0	0	0	0	0	0	0	0
-0.198869	-0.980026	0	0	1	1	1	0	0	1	0	0	0	1	0	1	0	0	0	1	0	0	1	1	1	0	1	1	0	0	0	0	1	1	0	1	0	1	0	1	0	0	0	0	0	0	1	0	1	0
-0.0989274	0.995095	1	1	0	0	0	0	1	0	0	0	1	0	0	0	0	1	0	0	0	1	0	0	0	0	0	0	1	1	0	1	0	0	1	0	1	0	1	0	0	1	0	1	0	1	0	0	0	0
-0.913013	0.407931	1	1	0	0	0	0	1	0	1	1	1	1	1	0	1	1	1	1	1	1	1	0	0	0	1	1	1	1	1	1	1	1	1	0	1	1	1	0	1	1	1	1	1	1	1	0	1	1
-0.274998	-0.961445	0	0	1	1	1	0	0	1	u	0	0	1	0	1	1	0	1	1	0	0	1	1	1	0	1	1	0	0	0	0	1	1	0	1	0	1	0	1	u	0	0	0	1	0	1	1	1	0
0.134058	0.990973	0	0	0	0	0	0	0	0	0	0	0	0	0	0	0	0	0	0	0	0	0	0	0	0	0	0	0	0	0	0	0	0	0	0	0	0	0	0	0	0	0	0	0	0	0	0	0	0
0.397789	-0.917477	0	0	1	1	1	1	0	1	1	1	0	1	0	1	1	0	1	1	1	0	1	1	1	1	1	1	0	0	1	0	1	1	0	1	0	1	0	1	1	0	1	0	0	0	1	1	1	u
0.701276	-0.71289	0	0	1	1	1	0	0	1	0	0	0	0	0	1	0	0	0	1	0	0	0	1	1	0	0	1	0	0	0	0	0	0	0	u	0	0	0	1	0	0	0	0	0	0	0	0	0	0
0.902045	0.431642	0	1	1	1	1	1	0	0	0	1	1	0	0	1	0	1	0	0	1	1	0	1	1	1	0	0	1	0	1	0	0	0	0	1	1	0	1	0	0	0	0	1	0	1	0	1	0	0
0.310529	-0.950564	0	0	1	1	1	1	0	1	1	1	0	1	0	1	1	0	1	1	1	0	1	1	1	1	1	1	0	0	1	0	1	1	0	1	1	1	0	1	1	0	1	0	1	0	1	1	1	1
0.918181	-0.396162	0	1	1	1	1	1	0	1	1	1	1	1	0	1	0	0	0	1	1	1	1	1	1	1	1	1	0	0	1	0	0	0	0	1	1	0	1	1	1	0	0	1	0	0	0	1	0	0
-0.977519	0.210847	1	1	0	0	0	0	1	1	1	1	1	1	1	0	1	1	1	1	1	1	1	0	0	0	1	1	1	1	1	1	1	1	1	1	1	1	1	1	1	1	1	1	1	1	1	1	1	1
0.425338	-0.905035	0	0	1	1	1	0	0	1	0	1	0	1	0	1	0	0	0	1	0	0	1	1	1	0	1	1	0	0	0	0	0	0	0	1	0	0	0	1	0	0	0	0	0	0	1	1	0	0
0.0377127	0.999289	0	0	0	0	0	0	0	0	0	0	0	0	0	0	0	1	0	0	0	0	0	0	0	0	0	0	0	0	0	0	0	0	0	0	0	0	0	0	0	0	0	0	0	0	0	0	0	0
0.988016	-0.154353	0	u	1	1	1	1	0	1	0	1	0	0	0	1	0	0	0	1	1	1	0	1	1	1	0	0	0	0	1	0	0	0	0	1	0	0	1	1	0	0	0	0	0	0	0	1	0	0
-0.862699	0.505719	1	1	0	0	0	0	1	u	1	1	1	1	1	0	1	1	1	1	1	1	1	0	0	0	1	1	1	1	1	1	1	1	1	1	1	1	1	0	1	1	1	1	1	1	1	1	1	1
-0.961499	-0.274808	0	0	0	0	0	0	0	0	0	0	0	0	0	0	0	0	0	0	0	0	0	0	0	0	0	0	0	0	0	0	u	1	0	0	0	u	0	0	0	0	0	0	0	0	1	0	0	0
-0.835566	0.54939	1	1	0	0	0	0	1	0	0	0	1	0	1	0	1	1	1	0	0	0	1	0	0	0	u	0	1	1	0	1	1	1	1	0	1	1	0	0	0	1	1	1	1	1	1	0	1	1
-0.263466	-0.964669	1	0	1	1	1	0	0	1	1	1	0	1	1	1	1	0	1	1	0	0	1	1	1	0	1	1	0	0	0	0	1	1	0	1	0	1	0	1	1	0	1	0	1	0	1	1	1	1
-0.297872	0.954606	1	1	0	0	0	0	1	0	0	0	1	0	1	0	1	1	1	0	1	1	0	0	0	u	0	0	1	1	0	1	0	0	1	0	1	1	1	0	0	1	1	1	1	1	0	0	0	1
-0.751	0.660303	1	1	0	0	0	0	1	0	0	0	1	0	1	0	1	1	1	0	0	1	1	0	0	0	1	0	1	1	0	1	1	1	1	0	1	1	1	0	0	1	1	1	1	1	1	0	1	1
-0.700163	0.713983	1	1	0	0	0	1	1	0	1	1	1	1	1	0	1	1	1	0	1	1	1	0	0	1	1	0	1	1	1	1	1	1	1	1	1	1	1	0	1	1	1	1	1	1	1	1	1	1
-0.284199	-0.958765	1	0	1	1	1	0	1	1	1	1	1	1	1	1	1	0	1	1	1	0	1	1	1	0	1	1	1	1	1	1	1	1	1	1	1	1	0	1	1	1	1	0	1	1	1	1	1	1
0.979918	0.199402	1	1	1	1	1	1	1	1	1	1	1	1	1	1	0	1	1	1	1	1	0	1	1	1	0	1	1	1	1	1	0	0	1	1	1	0	1	1	1	1	1	1	0	1	0	1	0	1
-0.563817	0.8259	1	1	0	0	0	0	1	0	0	0	1	0	1	0	1	1	1	0	0	1	0	0	0	0	0	0	1	1	0	1	1	0	1	0	1	1	1	0	0	1	1	1	1	1	0	0	1	1
-0.844589	0.535415	1	0	0	0	0	0	u	0	0	0	0	0	1	0	1	1	0	0	0	0	0	0	0	0	0	0	0	1	0	1	1	0	1	0	0	1	0	0	0	1	0	0	1	0	0	0	1	0
0.919079	-0.394074	1	1	1	1	1	1	1	1	1	1	1	1	1	1	1	1	1	1	1	1	1	1	1	1	1	1	1	0	1	1	1	1	0	1	1	0	1	1	1	1	1	1	0	1	1	1	1	1
0.763075	0.64631	1	1	1	1	1	1	1	1	1	1	1	1	1	1	1	1	1	1	1	1	1	1	1	1	1	1	1	1	1	1	0	0	1	1	1	0	1	1	1	1	1	1	1	1	0	1	0	1
0.489683	0.871901	1	1	1	1	1	1	1	0	1	1	1	0	1	u	0	1	1	0	1	1	0	1	1	1	0	0	1	1	1	1	0	0	1	1	1	0	1	0	1	1	1	1	0	1	0	1	0	1
0.0557699	-0.998444	0	0	0	0	0	0	0	1	0	0	0	0	0	1	0	0	0	1	0	0	0	u	0	0	0	1	0	0	0	0	0	0	0	0	0	0	0	1	0	0	0	0	0	0	1	0	0	0
-0.881132	-0.47287	1	0	0	1	u	0	1	1	1	1	1	1	1	1	1	1	1	1	1	0	1	1	1	0	1	1	1	1	1	1	1	1	1	1	1	1	0	1	1	1	1	0	1	1	1	1	1	1
0.24709	-0.968993	0	0	1	1	1	0	0	1	0	0	0	1	0	1	0	0	0	1	0	0	0	1	1	0	0	1	0	0	0	0	0	0	0	u	0	0	0	1	0	0	0	0	0	0	1	0	0	0
-0.604718	0.79644	1	1	0	0	0	1	1	1	1	1	1	1	1	0	1	1	1	1	1	1	1	0	0	1	1	1	1	1	1	1	1	1	1	1	1	1	1	0	1	1	1	1	1	1	1	1	1	1
-0.775523	0.63132	1	0	0	0	0	0	0	0	0	0	0	0	0	0	0	1	0	0	0	0	0	0	0	0	0	0	0	1	0	1	0	0	1	0	0	u	0	0	0	1	0	0	1	0	0	0	0	0
0.462826	-0.886449	0	0	1	1	1	0	0	1	0	0	0	1	0	1	0	0	0	1	0	0	0	1	1	0	0	1	0	0	0	0	0	0	0	1	0	0	0	1	0	0	0	0	0	0	0	u	0	0
-0.835208	0.549934	1	0	0	0	0	0	1	0	0	0	0	0	1	0	1	1	0	0	0	0	0	0	0	0	0	0	0	1	0	1	1	1	1	0	0	1	0	0	0	1	0	0	1	u	0	0	1	0
-0.313539	-0.949575	0	0	1	1	1	0	0	1	0	0	0	1	0	1	1	0	1	1	0	0	1	1	1	0	1	1	0	0	0	0	1	1	0	1	0	1	0	1	0	0	0	0	1	0	1	0	1	0
-0.730062	-0.683381	1	1	1	1	1	0	1	1	1	1	1	1	1	1	1	1	1	1	1	u	1	1	1	0	1	1	1	1	1	1	1	1	1	1	1	1	0	1	1	1	1	1	1	1	1	1	1	1
-0.932669	0.360732	1	1	0	0	0	0	1	1	1	1	1	1	1	0	1	1	1	1	1	1	1	0	0	u	1	1	1	1	1	1	1	1	1	1	1	1	1	1	1	1	1	1	1	1	1	1	1	1
-0.65816	-0.752878	1	0	1	1	1	0	1	1	1	1	1	1	1	1	1	1	1	1	1	0	1	1	1	0	1	1	1	1	1	1	1	1	1	1	1	1	0	1	1	1	1	0	1	1	1	1	1	1
-0.981772	0.190062	u	0	0	0	0	0	0	0	0	0	0	0	0	0	0	0	0	0	0	0	0	0	0	0	0	0	0	1	0	0	1	1	1	0	0	1	0	0	0	0	0	0	1	0	0	0	1	0
-0.54094	0.841061	1	1	0	0	0	0	1	0	1	0	1	0	1	0	1	1	1	0	1	1	u	0	0	0	0	0	1	1	1	1	1	1	1	0	1	1	1	0	u	1	1	1	1	1	0	0	1	1
0.97681	-0.214106	0	0	1	0	0	u	0	0	0	0	0	0	0	0	0	0	0	0	0	0	0	u	0	0	0	0	0	0	0	0	0	0	0	0	0	0	0	0	0	0	0	0	0	0	0	0	0	0
0.773742	0.633501	1	1	1	1	1	1	1	1	1	1	1	1	1	1	0	1	u	0	1	1	0	1	1	1	0	0	1	1	1	1	0	0	1	1	1	0	1	1	1	1	1	1	0	1	0	1	0	1
-0.968992	-0.247091	0	0	0	0	0	0	0	0	0	0	0	0	0	0	1	0	0	0	0	0	u	0	0	0	0	0	0	0	0	0	1	1	0	0	0	1	0	0	0	0	0	0	1	0	1	0	1	0
0.381354	0.924429	0	1	0	0	0	1	1	0	0	0	1	0	0	0	0	1	0	0	1	1	0	0	0	1	0	0	1	1	1	1	0	0	1	0	1	0	1	0	0	1	0	1	0	1	0	0	0	0
-0.992778	-0.119965	1	0	0	0	0	0	0	0	0	0	0	0	1	0	1	0	1	0	0	0	1	0	0	0	1	0	0	1	0	u	1	1	1	0	0	1	0	0	0	1	0	0	1	0	1	0	1	0
0.734092	-0.67905	0	0	1	u	1	0	0	0	0	0	0	0	0	1	0	0	0	0	0	0	0	1	1	0	0	0	0	0	0	0	0	0	0	0	0	0	0	0	0	0	0	0	0	0	0	0	0	0
-0.0385645	0.999256	1	1	1	1	1	1	1	1	1	1	1	1	1	1	1	1	1	0	1	1	1	1	1	1	1	0	1	1	1	1	1	1	1	1	1	1	1	u	1	1	1	1	1	1	1	1	1	1
0.959366	-0.282165	1	1	1	1	1	1	1	1	1	1	1	1	1	1	1	1	1	1	1	1	1	1	1	1	1	1	1	0	1	1	0	1	0	1	1	0	1	1	1	1	1	1	0	1	1	1	1	1
-0.1107	0.993854	1	1	0	0	0	1	1	0	1	1	1	0	1	0	1	1	1	0	1	1	0	0	0	1	0	0	1	1	1	1	1	0	1	0	1	1	1	0	1	1	1	1	1	1	0	0	1	1
0.143146	-0.989702	1	1	1	1	1	1	1	1	1	1	1	1	1	1	1	u	1	1	1	1	1	1	1	1	1	1	1	1	1	1	1	1	1	1	1	1	1	1	1	1	1	1	1	1	1	1	1	1
-0.983331	-0.181827	0	0	0	0	0	0	0	0	0	0	0	0	0	0	0	0	0	0	0	0	0	0	0	0	0	0	0	0	0	0	1	1	0	0	0	1	0	0	0	0	0	0	1	0	1	0	1	0
0.999373	-0.0354055	0	1	1	1	1	1	0	1	0	1	0	0	0	1	0	0	0	0	1	1	0	1	1	1	0	0	0	0	1	0	0	0	0	1	0	0	1	1	0	0	0	u	0	0	0	1	0	0
-0.479545	0.877517	1	1	0	0	0	1	1	0	1	1	1	1	1	0	1	1	1	0	1	1	1	0	0	1	1	0	1	1	1	1	1	1	1	1	1	1	1	0	1	1	1	1	1	1	1	1	1	1
0.967455	0.253043	0	1	1	1	1	1	0	1	1	1	1	0	0	1	0	0	0	0	1	1	0	1	1	1	0	0	1	0	1	0	0	0	0	1	1	0	1	1	1	0	0	1	0	1	0	1	0	0
0.284158	0.958777	1	1	0	0	0	1	1	0	0	u	1	0	1	0	0	1	0	0	1	1	0	0	0	1	0	0	1	1	1	1	0	0	1	0	1	0	1	0	0	1	0	1	0	1	0	0	0	1
-0.975846	0.218459	0	0	0	0	0	0	0	0	0	0	0	0	0	0	0	0	0	0	0	0	0	0	0	0	0	0	0	0	0	0	1	0	0	0	0	1	0	0	0	0	0	0	1	0	0	0	0	0
0.927999	-0.372583	1	1	1	1	1	1	1	1	1	1	1	1	1	1	1	1	1	1	1	1	1	1	1	1	1	1	1	1	1	1	1	1	1	1	1	1	1	1	1	1	1	1	u	1	1	1	1	1
0.540564	0.841303	0	1	0	0	0	1	0	0	0	0	1	0	0	0	0	1	0	0	1	1	0	0	0	1	0	0	1	u	1	1	0	0	1	0	1	0	1	0	0	1	0	1	0	1	0	0	0	0
0.999934	0.0115177	0	1	1	1	1	1	0	0	0	1	0	0	0	1	0	0	0	0	1	1	0	1	1	1	0	0	0	0	1	0	0	0	0	1	0	0	1	0	0	0	0	0	0	0	0	1	0	0
-0.884875	0.465829	1	1	0	1	u	1	1	1	1	1	1	1	1	0	1	1	1	1	1	1	1	0	u	1	1	1	1	1	1	1	1	1	1	1	1	1	1	1	1	1	1	1	1	1	1	1	1	1
0.816754	-0.576986	0	0	1	0	0	0	0	0	0	0	0	0	0	1	0	0	0	0	0	0	0	1	0	0	0	0	0	0	0	0	0	0	0	0	0	0	0	0	0	0	0	0	0	0	0	0	0	0
0.501229	-0.865315	0	0	1	1	1	1	0	1	1	1	1	1	0	1	1	0	1	1	1	0	1	1	1	1	1	1	0	0	1	0	1	1	0	1	1	1	0	1	1	0	1	0	0	0	1	1	1	1
0.725074	0.68867	1	1	1	1	1	1	1	1	1	1	1	1	1	1	1	1	1	1	1	1	1	1	1	1	1	1	1	1	1	1	u	0	1	1	1	1	1	1	1	1	1	1	1	1	0	1	1	1
0.908914	-0.416983	0	1	1	1	1	1	0	1	1	1	1	1	0	1	0	0	0	1	1	1	0	1	1	1	0	1	0	0	1	0	0	0	0	1	1	0	1	1	1	0	0	0	0	0	0	1	0	0
0.998785	0.0492702	0	1	1	1	1	1	0	1	1	1	1	1	0	1	0	0	0	1	1	1	0	1	1	1	0	0	u	0	1	0	0	0	0	1	1	0	1	1	1	0	0	1	0	0	0	1	0	0
0.461122	-0.887337	0	0	1	1	1	0	0	1	0	0	0	0	0	1	0	0	0	1	0	0	0	1	1	0	0	1	0	0	0	0	0	0	0	u	0	0	0	1	0	0	0	0	0	0	0	0	0	0
[truncated: 55 more columns]

## Sheet: 20
		0	1	2	3	4	5	6	7	8	9	10	11	12	13	14	15	16	17	18	19	20	21	22	23	24	25	26	27	28	29	30	31	32	33	34	35	36	37	38	39	40	41	42	43	44	45	46	47
-0.853154	-0.521659	1	0	0	0	0	0	0	0	0	0	0	0	1	0	1	0	1	1	0	0	1	0	0	0	1	1	0	0	0	0	1	1	0	0	0	1	0	0	0	0	0	0	1	0	1	0	1	0
-0.993395	0.114744	1	1	0	1	1	0	1	1	1	1	1	1	1	1	1	1	1	1	1	1	1	u	1	0	1	1	1	1	1	1	1	1	1	1	1	1	1	1	1	1	1	1	1	1	1	1	1	1
-0.775656	0.631156	1	u	0	0	0	0	1	0	0	0	0	0	1	0	1	1	1	0	0	0	0	0	0	0	0	0	1	1	0	1	1	1	1	0	0	1	0	0	0	1	u	1	1	1	0	0	1	1
0.892825	0.450404	0	1	1	1	1	1	0	0	0	1	1	0	0	1	0	0	0	0	1	1	0	1	1	1	0	0	0	0	1	0	0	0	0	0	1	0	1	0	0	0	0	1	0	0	0	1	0	0
0.661753	-0.749722	0	0	1	1	1	u	0	1	0	0	0	u	0	1	0	0	0	1	0	0	0	1	1	0	0	1	0	0	0	0	0	0	0	1	0	0	0	1	0	0	0	0	0	0	0	1	0	0
0.755804	-0.654798	0	u	1	1	1	1	0	1	1	1	1	1	0	1	0	0	u	1	1	1	1	1	1	1	1	1	0	0	1	0	0	1	0	1	1	0	1	1	1	0	1	0	0	0	1	1	0	0
-0.925281	-0.379283	1	0	0	0	0	0	1	1	1	0	0	1	1	0	1	1	1	1	0	0	1	0	0	0	1	1	1	1	0	1	1	1	1	0	0	1	0	1	1	1	1	0	1	1	1	0	1	1
-0.609215	-0.793005	1	0	0	1	0	0	u	1	1	0	0	1	1	1	1	0	1	1	0	0	1	1	1	0	1	1	0	0	0	0	1	1	0	1	0	1	0	1	1	0	1	0	1	0	1	u	1	1
-0.743892	-0.6683	1	0	0	1	0	0	1	1	1	0	0	1	1	1	1	0	1	1	0	0	1	0	0	0	1	1	0	1	0	1	1	1	1	1	0	1	0	1	1	1	1	0	1	0	1	u	1	1
0.998313	-0.0580601	0	0	1	u	1	1	0	0	0	0	0	0	0	1	0	0	0	0	0	0	0	1	1	1	0	0	0	0	0	0	0	0	0	0	0	0	0	0	0	0	0	0	0	0	0	0	0	0
-0.797942	-0.602734	1	0	0	0	0	0	1	1	1	0	0	1	1	u	1	0	1	1	0	0	1	0	0	0	1	1	0	1	0	1	1	1	1	1	0	1	0	1	1	1	1	0	1	0	1	0	1	1
0.1061	-0.994355	0	0	1	1	1	1	0	1	1	1	0	1	1	1	1	0	1	1	1	0	1	1	1	1	1	1	0	0	1	0	1	1	0	1	0	1	0	1	1	0	1	0	1	0	1	1	1	1
-0.881188	0.472766	1	0	0	0	0	0	1	0	0	0	0	0	1	0	1	1	1	0	0	0	0	0	0	0	0	0	1	1	0	1	1	1	1	0	0	1	0	0	0	1	u	0	1	1	0	0	1	1
0.730505	-0.682907	0	1	1	1	1	1	0	1	1	1	1	1	0	1	u	0	1	1	1	1	1	1	1	1	1	1	0	0	1	0	0	1	0	1	1	0	1	1	1	0	1	u	0	0	1	1	u	1
0.839147	0.543904	0	1	1	1	1	1	0	0	0	1	1	0	0	1	0	1	0	0	1	1	0	1	1	1	0	0	u	0	1	0	0	0	0	0	1	0	1	0	0	0	0	1	0	u	0	1	0	0
0.949548	0.313622	0	1	1	u	1	1	0	0	0	0	0	0	0	0	0	0	0	0	0	1	0	1	1	1	0	0	0	0	u	0	0	0	0	0	0	0	1	0	0	0	0	0	0	0	0	0	0	0
0.885481	0.464676	0	1	1	1	1	1	1	1	1	1	1	1	0	1	0	1	0	0	1	1	0	1	1	1	0	0	1	1	1	1	0	0	1	1	1	0	1	1	1	1	1	1	0	1	0	1	0	1
0.999592	0.0285473	0	1	1	1	1	1	0	1	0	1	1	0	0	1	0	0	0	0	1	1	0	1	1	1	0	0	0	0	1	0	0	0	0	1	u	0	1	1	0	0	0	1	0	0	0	1	0	0
-0.65339	0.757021	1	1	0	0	0	0	1	0	0	0	1	0	1	0	1	1	1	0	0	1	0	0	0	0	0	0	1	1	0	1	1	u	1	0	1	1	1	0	0	1	1	1	1	1	0	0	1	1
0.554947	0.831886	0	1	0	0	0	1	0	0	0	0	1	0	0	0	0	1	0	0	0	1	0	0	0	1	0	0	0	0	u	0	0	0	0	0	0	0	1	0	0	0	0	1	0	u	0	0	0	0
-0.652795	-0.757535	1	0	0	1	0	0	u	1	1	0	0	1	1	1	1	0	1	1	0	0	1	0	0	0	1	1	0	u	0	0	1	1	0	1	0	1	0	1	1	0	1	0	1	0	1	0	1	1
0.961308	0.275477	0	1	1	1	1	1	0	0	0	u	u	0	0	1	0	0	0	0	1	1	0	1	1	1	0	0	0	0	1	0	0	0	0	0	0	0	1	0	0	0	0	1	0	0	0	1	0	0
0.917184	-0.398464	0	1	1	1	1	1	0	1	1	1	1	1	0	1	0	0	u	1	1	1	1	1	1	1	1	1	1	0	1	0	0	0	0	1	1	0	1	1	1	0	1	1	0	1	1	1	0	u
0.863298	-0.504695	0	1	1	1	1	1	0	1	1	1	1	1	0	1	0	0	1	1	1	1	1	1	1	1	1	1	1	0	1	0	0	0	0	1	1	0	1	1	1	0	1	1	0	u	1	1	0	1
-0.481276	0.876569	1	1	0	0	0	1	1	0	1	1	1	0	1	0	1	1	1	0	1	1	1	0	0	1	u	0	1	1	1	1	1	1	1	0	1	1	1	0	1	1	1	1	1	1	0	0	1	1
-0.732846	-0.680395	1	0	0	1	u	0	1	1	1	1	0	1	1	1	1	0	1	1	0	0	1	1	1	0	1	1	u	1	0	1	1	1	1	1	0	1	0	1	1	1	1	0	1	u	1	1	1	1
-0.189704	0.981841	1	1	0	0	0	1	1	0	0	0	1	0	1	0	1	1	u	0	1	1	0	0	0	1	0	0	1	1	1	1	0	0	1	0	1	u	1	0	0	1	1	1	1	1	0	0	0	1
-0.945188	-0.326526	1	0	0	0	0	0	1	0	0	0	0	u	1	0	1	0	1	1	0	0	1	0	0	0	1	1	0	1	0	1	1	1	1	0	0	1	0	0	0	1	1	0	1	0	1	0	1	1
0.991422	0.130697	0	1	1	1	1	1	1	1	1	1	1	1	0	1	0	1	0	1	1	1	0	1	1	1	0	1	1	0	1	u	0	0	0	1	1	0	1	1	1	0	1	1	0	1	0	1	0	u
0.817048	0.576569	1	1	1	1	1	1	1	1	1	1	1	1	1	1	0	1	0	0	1	1	0	1	1	1	0	0	1	1	1	1	0	0	1	1	1	0	1	u	1	1	1	1	0	1	0	1	0	1
-0.939848	0.341594	1	0	0	0	0	0	u	0	0	0	0	0	1	0	1	1	u	0	0	0	0	0	0	0	0	0	0	1	0	1	1	1	1	0	0	1	0	0	0	1	0	0	1	0	0	0	1	0
-0.971666	0.236359	1	1	0	0	0	0	1	0	1	0	1	1	1	0	1	1	1	0	0	0	1	0	0	0	1	1	1	1	0	1	1	1	1	0	1	1	0	0	1	1	1	1	1	1	1	0	1	1
-0.19481	-0.980841	1	0	1	1	1	1	1	1	1	1	1	1	1	1	1	0	1	1	1	0	1	1	1	1	1	1	1	1	1	1	1	1	1	1	1	1	0	1	1	1	1	1	1	1	1	1	1	1
-0.466026	0.884771	1	1	0	0	0	0	1	0	0	0	1	0	1	0	1	1	1	0	u	1	0	0	0	0	0	0	1	1	0	1	1	0	1	0	1	1	1	0	0	1	1	1	1	1	0	0	1	1
0.722347	0.691531	0	1	0	0	0	1	0	0	0	0	1	0	0	0	0	1	0	0	u	1	0	0	0	1	0	0	0	0	1	0	0	0	0	0	0	0	1	0	0	0	0	1	0	0	0	0	0	0
0.536252	-0.844058	0	0	1	1	1	1	0	1	u	1	0	1	0	1	0	0	0	1	0	0	1	1	1	1	1	1	0	0	u	0	0	0	0	1	0	0	0	1	1	0	0	0	0	0	1	1	0	0
-0.917198	-0.398431	0	0	0	0	0	0	0	0	0	0	0	0	0	0	0	0	0	0	0	0	0	0	0	0	0	0	0	0	0	0	1	1	0	0	0	1	0	0	0	0	0	0	1	0	1	0	1	0
0.921798	-0.38767	0	1	1	1	1	1	1	1	1	1	1	1	0	1	0	0	1	1	1	1	1	1	1	1	1	1	1	0	1	0	0	0	0	1	1	0	1	1	1	0	1	1	0	1	1	1	0	1
-0.853389	-0.521275	1	0	0	0	0	0	0	0	0	0	0	1	1	0	1	0	1	1	0	0	1	0	0	0	1	1	0	1	0	0	1	1	u	0	0	1	0	1	0	0	1	0	1	0	1	0	1	1
0.953113	-0.302616	0	0	1	1	1	1	0	1	0	1	0	0	0	1	0	0	0	1	u	u	0	1	1	1	0	0	0	0	1	0	0	0	0	1	0	0	1	1	0	0	0	0	0	0	0	1	0	0
0.666456	-0.745545	1	1	1	1	1	1	1	1	1	1	1	1	1	1	1	0	1	1	1	1	1	1	1	1	1	1	1	0	1	1	1	1	0	1	1	1	1	1	1	1	1	1	1	1	1	1	1	1
0.984874	0.17327	0	0	1	0	u	1	0	0	0	0	0	0	0	0	0	0	0	0	0	0	0	u	0	1	0	0	0	0	0	0	0	0	0	0	0	0	u	0	0	0	0	0	0	0	0	0	0	0
-0.494477	0.869191	0	0	0	0	0	0	0	0	0	0	0	0	0	0	0	1	0	0	0	0	0	0	0	0	0	0	0	1	0	u	0	0	1	0	0	0	0	0	0	1	0	u	0	0	0	0	0	0
0.981048	-0.193765	0	0	1	1	1	1	0	1	0	1	0	0	0	1	0	0	0	0	u	1	0	1	1	1	0	0	0	0	1	0	0	0	0	1	0	0	1	1	0	0	0	0	0	0	0	1	0	0
-0.410173	0.912008	1	1	0	0	0	0	0	0	0	0	0	0	0	0	0	1	0	0	0	u	0	0	0	0	0	0	u	1	0	1	0	0	1	0	0	0	1	0	0	1	0	1	0	1	0	0	0	0
-0.674188	0.73856	1	1	0	0	0	0	1	0	0	0	1	0	1	0	1	1	1	0	0	1	0	0	0	0	0	0	1	1	0	1	1	1	1	0	1	1	1	0	0	1	1	1	1	1	0	0	1	1
0.316914	-0.948454	0	0	0	0	0	0	0	0	0	0	0	0	0	1	0	0	0	1	0	0	0	u	0	0	0	u	0	0	0	0	0	0	0	0	0	0	0	1	0	0	0	0	0	0	0	0	0	0
0.575159	-0.818042	0	0	1	1	1	1	0	1	0	1	0	1	0	1	0	0	0	1	0	0	0	1	1	1	u	1	0	0	0	0	0	0	0	1	0	0	0	1	0	0	0	0	0	0	1	1	0	0
-0.00185062	0.999998	1	1	0	0	u	1	1	0	1	1	1	0	1	0	1	1	1	0	1	1	0	0	0	1	0	0	1	1	1	1	1	0	1	1	1	1	1	0	1	1	1	1	1	1	0	1	1	1
0.426313	0.904576	1	1	1	1	1	1	1	1	1	1	1	1	1	1	1	1	1	0	1	1	0	1	1	1	0	0	1	1	1	1	0	0	1	1	1	u	1	0	1	1	1	1	1	1	0	1	u	1
0.998237	0.0593595	0	0	u	0	0	1	0	0	0	0	0	0	0	0	0	0	0	0	0	0	0	0	0	1	0	0	0	0	0	0	0	0	0	0	0	0	0	0	0	0	0	0	0	0	0	0	0	0
-0.950924	-0.309425	1	0	0	0	0	0	1	1	1	0	0	1	1	0	1	1	1	1	0	0	1	0	0	0	1	1	1	1	0	1	1	1	1	0	0	1	0	1	1	1	1	0	1	1	1	0	1	1
-0.758847	-0.651269	0	0	0	0	0	0	0	0	0	0	0	0	0	0	0	0	0	0	0	0	0	0	0	0	0	0	0	0	0	0	0	1	0	0	0	0	0	0	0	0	0	0	0	0	1	0	0	0
0.700473	0.713679	0	1	1	0	1	1	0	0	0	1	1	0	0	0	0	1	0	0	1	1	0	1	1	1	0	0	1	0	1	0	0	0	0	0	1	0	1	0	0	0	0	1	0	1	0	u	0	0
0.280601	-0.959824	0	0	1	1	1	0	0	1	1	1	0	1	0	1	0	0	0	1	0	0	1	1	1	0	1	1	0	0	0	0	0	1	0	1	0	0	0	1	1	0	0	0	0	0	1	1	0	0
0.563585	0.826058	0	1	1	0	u	1	1	0	0	1	1	0	0	0	0	1	0	0	1	1	0	0	0	1	0	0	1	1	1	1	0	0	1	0	1	0	1	0	0	1	0	1	0	1	0	0	0	0
0.54834	0.836255	1	1	1	1	1	1	1	0	1	1	1	0	1	0	0	1	0	0	1	1	0	1	1	1	0	0	1	1	1	1	0	0	1	u	1	0	1	0	1	1	1	1	0	1	0	1	0	1
-0.890924	-0.454153	1	0	0	0	0	0	1	1	1	0	0	1	1	0	1	0	1	1	0	0	1	0	0	0	1	1	0	1	0	1	1	1	1	0	0	1	0	1	u	1	1	0	1	0	1	0	1	1
0.987384	-0.158343	0	0	1	1	1	1	0	0	0	0	0	0	0	1	0	0	0	0	0	0	0	1	1	1	0	0	0	0	0	0	0	0	0	0	0	0	0	0	0	0	0	0	0	0	0	0	0	0
0.924513	-0.381151	0	0	1	1	1	1	0	1	u	1	0	1	0	1	0	0	0	1	1	1	0	1	1	1	0	1	0	0	1	0	0	0	0	1	0	0	1	1	1	0	0	0	0	0	0	1	0	0
0.686761	0.726884	1	1	1	1	1	1	1	1	1	1	1	1	1	1	1	1	1	1	1	1	0	1	1	1	0	0	1	1	1	1	0	0	1	1	1	0	1	1	1	1	1	1	1	1	0	1	0	1
-0.295675	-0.955289	1	u	1	1	1	1	1	1	1	1	1	1	1	1	1	1	1	1	1	0	1	1	1	1	1	1	1	1	1	1	1	1	1	1	1	1	0	1	1	1	1	1	1	1	1	1	1	1
0.622068	0.782964	0	1	0	0	0	1	0	0	0	0	1	0	0	0	0	1	0	0	0	1	0	0	0	1	0	0	0	0	u	0	0	0	0	0	0	0	1	0	0	0	0	1	0	0	0	0	0	0
0.956488	0.291772	0	1	1	1	1	1	1	1	1	1	1	1	u	1	0	1	0	1	1	1	0	1	1	1	0	1	1	u	1	1	0	0	1	1	1	0	1	1	1	1	1	1	0	1	0	1	0	1
0.422506	-0.90636	0	0	1	1	1	1	0	1	1	1	0	1	0	1	0	0	0	1	u	0	1	1	1	1	1	1	0	0	1	0	0	1	0	1	0	0	0	1	1	0	0	0	0	0	1	1	0	0
0.599701	0.800224	0	1	0	0	0	1	0	0	0	0	1	0	0	0	0	1	0	0	1	1	0	0	0	1	0	0	1	0	1	0	0	0	0	0	1	0	1	0	0	0	0	1	0	1	0	0	0	0
-0.521368	0.853332	1	1	0	0	0	0	1	0	0	0	1	0	1	0	1	1	1	0	0	1	0	0	0	0	0	0	1	1	0	1	1	0	1	0	1	1	1	0	0	1	1	1	1	1	0	0	1	1
0.445241	-0.895411	0	0	1	1	1	1	0	1	1	1	0	1	0	1	0	0	u	1	1	0	1	1	1	1	1	1	0	0	1	0	0	1	0	1	0	0	0	1	1	0	0	0	0	0	1	1	u	0
-0.555545	-0.831487	1	0	1	1	1	0	1	1	1	1	1	1	1	1	1	1	1	1	1	0	1	1	1	0	1	1	1	1	1	1	1	1	1	1	1	1	0	1	1	1	1	0	1	1	1	1	1	1
-0.941828	-0.336094	0	0	0	0	0	0	0	0	0	0	0	0	0	0	1	0	0	0	0	0	1	0	0	0	u	0	0	0	0	0	1	1	0	0	0	1	0	0	0	0	0	0	1	0	1	0	1	0
-0.067343	0.99773	1	1	0	0	0	1	1	0	0	0	1	0	1	0	0	1	0	0	u	1	0	0	0	1	0	0	1	1	0	1	0	0	1	0	1	0	1	0	0	1	0	1	0	1	0	0	0	u
-0.434087	0.900871	1	1	0	0	0	0	1	0	0	0	1	0	1	0	0	1	0	0	0	1	0	0	0	0	0	0	1	1	0	1	0	0	1	0	u	0	1	0	0	1	0	1	1	1	0	0	0	u
-0.182913	-0.983129	1	0	1	1	1	0	1	1	1	1	0	1	1	1	1	0	1	1	1	0	1	1	1	0	1	1	0	0	1	u	1	1	0	1	1	1	0	1	1	u	1	0	1	0	1	1	1	1
0.29013	0.956987	1	1	u	0	u	1	1	0	1	1	1	0	1	0	0	1	u	0	1	1	0	0	0	1	0	0	1	1	1	1	0	0	1	0	1	0	1	0	1	1	1	1	0	1	0	1	0	1
0.119567	-0.992826	1	0	1	1	1	1	1	1	1	1	u	1	1	1	1	0	1	1	1	0	1	1	1	1	1	1	0	0	1	0	1	1	0	1	1	1	0	1	1	0	1	0	1	0	1	1	1	1
0.245134	0.969489	0	1	0	0	0	1	0	0	0	0	1	0	0	0	0	1	0	0	0	1	0	0	0	1	0	0	u	0	0	0	0	0	1	0	0	0	1	0	0	0	0	1	0	u	0	0	0	0
-0.990561	0.137074	1	0	0	0	0	0	0	0	0	0	0	0	1	0	1	0	0	0	0	0	0	0	0	0	0	0	0	1	0	0	1	1	1	0	0	1	0	0	0	u	0	0	1	0	1	0	1	0
0.926126	0.377214	0	u	1	0	u	1	0	0	0	0	0	0	0	0	0	0	0	0	0	1	0	0	0	1	0	0	0	0	0	0	0	0	0	0	0	0	1	0	0	0	0	0	0	0	0	0	0	0
0.87368	0.486502	1	1	1	1	1	1	1	1	1	1	1	1	1	1	1	1	1	1	1	1	1	1	1	1	1	1	1	1	1	1	0	0	1	1	1	0	1	1	1	1	1	1	0	1	0	1	0	1
-0.594773	-0.803894	0	0	0	0	0	0	0	0	0	0	0	0	0	0	0	0	0	1	0	0	1	0	0	0	1	1	0	0	0	0	1	1	0	0	0	1	0	1	0	0	0	0	1	0	1	0	1	0
-0.477192	-0.878799	1	0	1	1	1	0	0	1	1	0	0	1	1	1	1	0	1	1	0	0	1	1	1	0	1	1	0	0	0	0	1	1	0	1	0	1	0	1	1	0	1	0	1	0	1	1	1	1
0.658734	0.752376	0	1	0	0	0	1	0	0	0	0	1	0	0	0	0	1	0	0	1	1	0	0	0	1	0	0	1	0	1	0	0	0	0	0	1	0	1	0	0	0	0	1	0	1	0	0	0	0
0.655263	-0.7554	0	0	1	1	1	1	0	1	0	1	0	1	0	1	0	0	0	1	0	0	0	1	1	1	0	1	0	0	0	0	0	0	0	1	0	0	0	1	0	0	0	0	0	0	0	1	0	0
0.194143	0.980973	0	1	0	0	0	0	0	0	0	0	0	0	0	0	0	1	0	0	0	1	0	0	0	0	0	0	0	0	0	0	0	0	0	0	0	0	1	0	0	0	0	1	0	0	0	0	0	0
0.132028	-0.991246	0	0	1	1	1	0	0	1	0	0	0	1	0	1	0	0	0	1	0	0	0	1	1	0	u	1	0	0	0	0	0	u	0	0	0	0	0	1	0	0	0	0	0	0	1	0	0	0
0.859262	0.511536	1	1	1	1	1	1	1	1	1	1	1	1	1	1	0	1	u	1	1	1	0	1	1	1	0	0	1	1	1	1	0	0	1	1	1	0	1	1	1	1	1	1	0	1	0	1	0	1
0.269462	0.963011	0	1	0	0	0	0	0	0	0	0	0	0	0	0	0	1	0	0	0	1	0	0	0	0	0	0	0	0	0	0	0	0	0	0	0	0	1	0	0	0	0	1	0	0	0	0	0	0
-0.986635	-0.162947	1	1	0	1	0	0	1	1	1	1	1	1	1	1	1	1	1	1	1	1	1	0	u	0	1	1	1	1	1	1	1	1	1	1	1	1	0	1	1	1	1	1	1	1	1	1	1	1
-0.0547704	0.998499	1	1	0	0	0	1	1	0	u	u	1	0	1	0	1	1	1	0	1	1	0	0	0	1	0	0	1	1	1	1	0	0	1	0	1	1	1	0	0	1	1	1	1	1	0	0	0	1
0.119976	-0.992777	0	0	0	0	0	0	0	u	0	0	0	0	0	1	0	0	0	1	0	0	0	u	0	0	0	1	0	0	0	0	0	0	0	0	0	0	0	1	0	0	0	0	0	0	1	0	0	0
0.139839	0.990174	0	1	0	0	0	0	0	0	0	0	0	0	0	0	0	1	0	0	0	1	0	0	0	0	0	0	0	0	0	0	0	0	0	0	0	0	1	0	0	0	0	1	0	0	0	0	0	0
-0.0445126	-0.999009	1	1	1	1	1	1	1	1	1	1	1	1	1	1	1	u	1	1	1	1	1	1	1	1	1	1	1	1	1	1	1	1	1	1	1	1	1	1	1	1	1	1	1	1	1	1	1	1
0.199774	0.979842	1	1	1	1	1	1	1	1	1	1	1	1	1	1	1	1	1	1	1	1	1	1	1	1	1	u	1	1	1	1	1	1	1	1	1	1	1	1	1	1	1	1	1	1	0	1	1	1
-0.999967	-0.00809245	1	1	0	0	0	0	1	1	1	1	1	1	1	0	1	1	1	1	1	u	1	0	0	0	1	1	1	1	1	1	1	1	1	1	1	1	0	1	1	1	1	1	1	1	1	1	1	1
-0.231752	0.972775	1	1	u	0	1	1	1	0	1	1	1	1	1	0	1	1	1	0	1	1	1	0	u	1	1	0	1	1	1	1	1	1	1	1	1	1	1	0	1	1	1	1	1	1	1	1	1	1
-0.374939	-0.927049	0	0	1	1	1	0	0	1	1	0	0	1	0	1	1	0	1	1	0	0	1	1	1	0	1	1	0	0	0	0	1	1	0	1	0	1	0	1	1	0	1	0	1	0	1	1	1	0
-0.108998	0.994042	1	1	1	0	1	1	1	0	1	1	1	1	1	0	1	1	1	0	1	1	1	0	u	1	1	0	1	1	1	1	1	1	1	1	1	1	1	0	1	1	1	1	1	1	0	1	1	1
-0.562103	-0.827067	1	0	1	1	1	0	1	1	1	1	0	1	1	1	1	0	1	1	0	0	1	1	1	0	1	1	0	1	0	1	1	1	u	1	0	1	0	1	1	1	1	0	1	0	1	1	1	1
0.419673	-0.907676	0	0	1	1	1	1	0	1	1	1	0	1	0	1	u	0	1	1	1	0	1	1	1	1	1	1	0	0	1	0	1	1	0	1	0	0	0	1	1	0	u	0	0	0	1	1	1	0
0.968587	0.248675	1	1	1	1	1	1	1	1	1	1	1	1	1	1	0	1	1	1	1	1	0	1	1	1	0	1	1	1	1	1	0	0	1	1	1	0	1	1	1	1	1	1	0	1	0	1	0	1
0.362053	0.932157	1	1	1	1	1	1	1	0	1	1	1	0	1	0	1	1	1	0	1	1	0	1	1	1	0	0	1	1	1	1	0	0	1	1	1	0	1	0	1	1	1	1	1	1	0	1	0	1
0.49193	-0.870635	1	1	1	1	1	1	1	1	1	1	1	1	1	1	1	0	1	1	1	1	1	1	1	1	1	1	1	0	1	u	1	1	0	1	1	1	1	1	1	0	1	1	1	1	1	1	1	1
0.98895	-0.148251	0	0	1	1	1	1	0	0	0	0	0	0	0	1	0	0	0	0	0	0	0	1	1	1	0	0	0	0	0	0	0	0	0	0	0	0	0	0	0	0	0	0	0	0	0	0	0	0
0.979536	0.201267	0	1	1	1	1	1	1	1	1	1	1	1	0	1	0	1	0	1	1	1	0	1	1	1	0	1	1	0	1	1	0	0	0	1	1	0	1	1	1	1	1	1	0	1	0	1	0	1
0.782156	-0.623082	0	0	1	1	1	0	0	u	0	0	0	0	0	1	0	0	0	0	0	0	0	1	1	0	0	0	0	0	0	0	0	0	0	0	0	0	0	1	0	0	0	0	0	0	0	0	0	0
-0.713795	-0.700355	1	0	1	1	1	0	1	1	1	1	u	1	1	1	1	1	1	1	1	0	1	1	1	0	1	1	1	1	1	1	1	1	1	1	1	1	0	1	1	1	1	0	1	1	1	1	1	1
-0.215492	0.976506	1	1	0	0	0	1	1	0	1	1	1	0	1	0	1	1	1	0	1	1	0	0	0	1	0	0	1	1	1	1	1	0	1	0	1	1	1	0	1	1	1	1	1	1	0	0	1	1
0.983766	0.179458	0	1	1	1	1	1	0	0	0	0	0	0	0	1	0	0	0	0	u	1	0	1	1	1	0	0	0	0	1	0	0	0	0	0	0	0	1	0	0	0	0	0	0	0	0	u	0	0
-0.591537	0.806278	1	1	0	0	0	1	1	0	1	1	1	0	1	0	1	1	1	0	1	1	1	0	0	1	1	0	1	1	1	1	1	1	1	0	1	1	1	0	1	1	1	1	1	1	1	0	1	1
0.3449	0.93864	0	1	0	0	0	1	0	0	0	0	1	0	0	0	0	1	0	0	0	1	0	0	0	1	0	0	1	1	u	u	0	0	1	0	1	0	1	0	0	u	0	1	0	1	0	0	0	0
0.992578	0.121613	1	1	1	1	1	1	1	1	1	1	1	1	1	1	1	1	1	1	1	1	1	1	1	1	1	1	1	1	1	1	0	0	1	1	1	0	1	1	1	1	1	1	0	1	0	1	u	1
-0.966041	0.258388	1	1	0	0	0	0	1	1	1	1	1	1	1	0	1	1	1	1	1	1	1	0	0	0	1	1	1	1	1	1	1	1	1	1	1	1	1	1	1	1	1	1	1	1	1	1	1	1
-0.297126	0.954838	0	0	0	0	0	0	0	0	0	0	0	0	0	0	0	1	0	0	0	0	0	0	0	0	0	0	0	0	0	0	0	0	0	0	0	0	0	0	0	0	0	0	0	0	0	0	0	0
-0.877108	-0.480293	1	0	0	0	0	0	1	1	1	0	0	1	1	0	1	1	1	1	0	0	1	0	0	0	1	1	1	1	0	1	1	1	1	1	0	1	0	1	1	1	1	0	1	1	1	0	1	1
0.285132	0.958488	0	0	0	0	0	0	0	0	0	0	0	0	0	0	0	0	0	0	0	u	0	0	0	0	0	0	0	0	0	0	0	0	0	0	0	0	1	0	0	0	0	0	0	0	0	0	0	0
0.203518	0.979071	1	1	0	0	0	1	1	0	1	1	1	0	1	0	1	1	1	0	1	1	0	0	0	1	0	0	1	1	1	1	0	0	1	0	1	0	1	0	1	1	1	1	1	1	0	1	0	1
0.727244	-0.686379	u	1	1	1	1	1	1	1	1	1	1	1	1	1	1	0	1	1	1	1	1	1	1	1	1	1	1	0	1	u	1	1	0	1	1	1	1	1	1	0	1	1	0	1	1	1	1	1
0.518368	0.855158	0	1	0	0	0	1	0	0	0	0	1	0	0	0	0	1	0	0	0	1	0	0	0	1	0	0	0	0	0	0	0	0	0	0	0	0	1	0	0	0	0	1	0	0	0	0	0	0
-0.922301	-0.386473	0	0	0	0	0	0	0	0	0	0	0	0	0	0	1	0	u	0	0	0	1	0	0	0	1	0	0	0	0	0	1	1	0	0	0	1	0	0	0	0	0	0	1	0	1	0	1	0
0.15655	-0.98767	0	0	1	1	1	0	0	1	1	1	0	1	0	1	0	0	0	1	0	0	1	1	1	0	1	1	0	0	0	0	1	1	0	1	0	u	0	1	1	0	0	0	0	0	1	1	1	0
0.985117	0.171883	0	1	1	1	1	1	0	1	1	1	1	1	0	1	0	0	0	1	1	1	0	1	1	1	0	0	1	0	1	0	0	0	0	1	1	0	1	1	1	0	0	1	0	1	0	1	0	0
-0.547777	-0.836625	1	0	1	1	1	0	1	1	1	1	u	1	1	1	1	0	1	1	1	0	1	1	1	0	1	1	1	1	1	1	1	1	1	1	1	1	0	1	1	1	1	0	1	1	1	1	1	1
-0.121454	-0.992597	1	0	1	1	1	0	u	1	1	1	0	1	1	1	1	0	1	1	1	0	1	1	1	0	1	1	0	0	1	0	1	1	0	1	0	1	0	1	1	0	1	0	1	0	1	1	1	1
0.966882	0.255224	0	1	1	1	1	1	0	1	1	1	1	1	0	1	0	1	0	1	1	1	0	1	1	1	0	0	1	0	1	0	0	0	0	1	1	0	1	1	1	0	0	1	0	1	0	1	0	0
0.873332	-0.487125	0	1	1	1	1	1	0	1	1	1	1	1	0	1	0	0	0	1	1	1	1	1	1	1	1	1	0	0	1	0	0	0	0	1	1	0	1	1	1	0	0	u	0	0	0	1	0	0
0.796461	0.60469	0	1	1	u	1	1	0	0	0	u	1	0	0	0	0	1	0	0	1	1	0	1	1	1	0	0	u	0	1	0	0	0	0	0	1	0	1	0	0	0	0	1	0	u	0	u	0	0
0.293713	-0.955894	0	0	1	1	1	0	0	1	0	1	0	1	0	1	0	0	0	1	0	0	1	1	1	0	1	1	0	0	0	0	0	1	0	1	0	0	0	1	u	0	0	0	0	0	1	1	0	0
-0.260098	-0.965582	1	0	1	1	1	1	1	1	1	1	1	1	1	1	1	0	1	1	1	0	1	1	1	1	1	1	1	1	1	1	1	1	1	1	1	1	0	1	1	1	1	0	1	1	1	1	1	1
0.456864	-0.889537	0	0	1	1	1	1	0	1	0	1	0	1	0	1	0	0	0	1	0	0	1	1	1	u	1	1	0	0	0	0	0	0	0	1	0	0	0	1	1	0	0	0	0	0	1	1	0	0
0.736498	-0.676439	0	0	1	1	1	1	0	1	0	0	0	0	0	1	0	0	0	1	0	0	0	1	1	1	0	1	0	0	0	0	0	0	0	1	0	0	0	1	0	0	0	0	0	0	0	1	0	0
-0.299876	-0.953978	0	0	0	1	0	0	0	1	0	0	0	1	0	1	0	0	0	1	0	0	1	1	u	0	1	1	0	0	0	0	1	1	0	0	0	1	0	1	0	0	0	0	0	0	1	0	1	0
0.558057	0.829803	0	0	0	0	0	0	0	0	0	0	0	0	0	0	0	0	0	0	0	0	0	0	0	0	0	0	0	0	0	0	0	0	0	0	0	0	u	0	0	0	0	0	0	0	0	0	0	0
-0.280065	0.959981	1	1	0	0	0	1	1	0	u	0	1	0	1	0	1	1	1	0	1	1	0	0	0	1	0	0	1	1	1	1	1	0	1	0	1	1	1	0	0	1	1	1	1	1	0	0	1	1
0.45756	0.889179	1	1	1	1	1	1	1	1	1	1	1	1	1	1	1	1	1	u	1	1	1	1	1	1	1	0	1	1	1	1	1	0	1	1	1	1	1	1	1	1	1	1	1	1	0	1	1	1
-0.517132	-0.855906	u	0	0	1	0	0	0	1	1	0	0	1	1	1	1	0	1	1	0	0	1	1	1	0	1	1	0	0	0	0	1	1	0	1	0	1	0	1	1	0	1	0	1	0	1	u	1	1
0.77042	-0.637537	1	1	1	1	1	1	1	1	1	1	1	1	1	1	1	0	1	1	1	1	1	1	1	1	1	1	1	0	1	1	1	1	0	1	1	1	1	1	1	1	1	1	u	1	1	1	1	1
-0.77339	0.63393	1	1	0	0	0	0	1	0	1	0	1	0	1	0	1	1	1	0	0	1	1	0	0	0	1	0	1	1	0	1	1	1	1	0	1	1	1	0	0	1	1	1	1	1	1	0	1	1
0.958426	0.28534	0	1	1	1	1	1	1	1	1	1	1	1	0	1	0	1	0	1	1	1	0	1	1	1	0	0	1	0	1	u	0	0	0	1	1	0	1	1	1	0	0	1	0	1	0	1	0	0
-0.0591135	0.998251	0	1	0	0	0	0	0	0	0	0	0	0	0	0	0	1	0	0	0	0	0	0	0	0	0	0	0	0	0	0	0	0	0	0	0	0	u	0	0	0	0	u	0	0	0	0	0	0
0.987723	-0.156217	0	1	1	1	1	1	0	1	1	1	1	1	0	1	0	0	0	1	1	1	0	1	1	1	0	1	1	0	1	0	0	0	0	1	1	0	1	1	1	0	0	1	0	1	0	1	0	0
-0.0913557	0.995818	1	1	0	0	0	1	1	0	0	0	1	0	1	0	0	1	0	0	1	1	0	0	0	1	0	0	1	1	1	1	0	0	1	0	1	0	1	0	0	1	1	1	1	1	0	0	0	1
0.371263	0.928528	0	1	0	0	0	0	0	0	0	0	0	0	0	0	0	0	0	0	0	1	0	0	0	0	0	0	0	0	0	0	0	0	0	0	0	0	1	0	0	0	0	u	0	0	0	0	0	0
0.494008	-0.869457	0	0	1	1	1	1	0	1	1	1	0	1	0	1	0	0	0	1	0	0	1	1	1	1	1	1	0	0	1	0	0	u	0	1	0	0	0	1	1	0	0	0	0	0	1	1	0	0
0.178884	0.98387	0	1	0	0	0	1	0	0	0	0	1	0	0	0	0	1	0	0	0	1	0	0	0	1	0	0	1	1	0	1	0	0	1	0	u	0	1	0	0	1	0	1	0	1	0	0	0	0
-0.211352	0.97741	0	0	0	0	0	0	0	0	0	0	0	0	0	0	0	1	0	0	0	0	0	0	0	0	0	0	0	0	0	0	0	0	0	0	0	0	0	0	0	0	0	0	0	0	0	0	0	0
-0.989887	0.141857	1	0	0	0	0	0	1	0	0	0	0	0	1	0	1	1	1	0	0	0	1	0	0	0	1	0	1	1	0	1	1	1	1	0	0	1	0	0	0	1	1	0	1	1	1	0	1	1
-0.774497	-0.632577	1	0	0	1	0	0	1	1	1	1	0	1	1	1	1	0	1	1	0	0	1	0	u	0	1	1	u	1	0	1	1	1	1	1	0	1	0	1	1	1	1	0	1	u	1	1	1	1
-0.41113	0.911577	1	1	1	1	1	1	1	1	1	1	1	1	1	u	1	1	1	1	1	1	1	1	1	1	1	1	1	1	1	1	1	1	1	1	1	1	1	1	1	1	1	1	1	1	1	1	1	1
-0.647043	0.762454	1	0	0	0	0	0	0	0	0	0	0	0	u	0	0	1	0	0	0	0	0	0	0	0	0	0	0	1	0	1	0	0	1	0	0	0	0	0	0	1	0	0	1	0	0	0	0	0
0.155116	-0.987896	0	0	1	1	1	0	0	1	0	0	0	1	0	1	0	0	0	1	0	0	1	1	1	0	1	1	0	0	0	0	0	1	0	1	0	0	0	1	0	0	0	0	0	0	1	1	0	0
-0.981233	-0.192825	1	0	0	0	0	0	1	1	1	0	1	1	1	0	1	1	1	1	0	0	1	0	0	0	1	1	1	1	0	1	1	1	1	u	1	1	0	1	1	1	1	0	1	1	1	0	1	1
-0.19926	0.979947	1	1	0	0	0	0	1	0	0	0	1	0	1	0	0	1	0	0	0	1	0	0	0	u	0	0	1	1	0	1	0	0	1	0	1	0	1	0	0	1	0	1	1	1	0	0	0	1
0.877079	-0.480346	0	0	1	1	1	1	0	1	0	1	0	1	0	1	0	0	0	1	1	0	0	1	1	1	0	1	0	0	1	0	0	0	0	1	0	0	0	1	u	0	0	0	0	0	0	1	0	0
-0.401132	0.91602	1	1	0	0	0	u	1	0	u	0	1	0	1	0	1	1	1	0	1	1	0	0	0	1	0	0	1	1	1	1	1	0	1	0	1	1	1	0	0	1	1	1	1	1	0	0	1	1
0.99895	0.045821	0	1	1	1	1	1	1	1	1	1	1	1	0	1	0	1	0	1	1	1	0	1	1	1	0	1	1	0	1	1	0	0	0	1	1	0	1	1	1	u	1	1	0	1	0	1	0	1
0.773691	0.633564	1	1	1	1	1	1	1	1	1	1	1	1	1	1	1	1	1	1	1	1	0	1	1	1	0	0	1	1	1	1	0	0	1	1	1	0	1	1	1	1	1	1	0	1	0	1	0	1
-0.996541	0.0830969	1	0	0	0	0	0	1	0	1	0	0	0	1	0	1	1	1	0	0	0	1	0	0	0	1	1	1	1	0	1	1	1	1	0	1	1	0	0	0	1	1	0	1	1	1	0	1	1
0.942346	-0.334639	0	1	1	1	1	1	0	1	1	1	1	1	0	1	0	0	0	1	1	1	0	1	1	1	0	1	0	0	1	0	0	0	0	1	1	0	1	1	1	0	0	1	0	0	0	1	0	0
0.895517	-0.445027	0	0	1	1	1	1	0	1	0	0	0	0	0	1	0	0	0	u	0	0	0	1	1	1	0	0	0	0	0	0	0	0	0	1	0	0	0	1	0	0	0	0	0	0	0	1	0	0
-0.356607	-0.934255	1	0	1	1	1	0	1	1	1	1	0	1	1	1	1	0	1	1	0	0	1	1	1	0	1	1	0	0	0	0	1	1	0	1	0	1	0	1	1	0	1	0	1	0	1	1	1	1
-0.577747	0.816216	0	0	0	0	0	0	0	0	0	0	0	0	0	0	0	1	0	0	0	0	0	0	0	0	0	0	0	0	0	0	0	0	1	0	0	0	0	0	0	0	0	0	0	0	0	0	0	0
0.612523	0.790453	1	1	1	1	1	1	1	0	1	1	1	0	1	1	0	1	u	0	1	1	0	1	1	1	0	0	1	1	1	1	0	0	1	1	1	0	1	0	1	1	1	1	0	1	0	1	0	1
0.0626573	-0.998035	0	0	0	0	0	0	0	0	0	0	0	0	0	0	0	0	0	1	0	0	0	0	0	0	0	1	0	0	0	0	0	0	0	0	0	0	0	u	0	0	0	0	0	0	0	0	0	0
0.0300094	-0.99955	0	0	1	1	1	0	0	1	1	1	0	1	0	1	u	0	u	1	0	0	1	1	1	0	1	1	0	0	0	0	1	1	0	1	0	1	0	1	1	0	0	0	0	0	1	1	1	0
-0.982346	-0.187073	1	0	0	0	0	0	1	0	0	0	0	0	1	0	1	u	1	0	0	0	1	0	0	0	1	1	0	1	0	1	1	1	1	0	0	1	0	0	0	1	1	0	1	0	1	0	1	1
0.214003	0.976833	1	1	1	1	1	1	1	1	1	1	1	1	1	1	1	1	1	0	1	1	1	1	1	1	1	0	1	1	1	1	1	u	1	1	1	1	1	u	1	1	1	1	1	1	0	1	1	1
0.712731	0.701437	0	1	0	0	0	1	0	0	0	0	0	0	0	0	0	0	0	0	0	1	0	0	0	1	0	0	0	0	0	0	0	0	0	0	0	0	1	0	0	0	0	0	0	0	0	0	0	0
-0.198869	-0.980026	0	0	u	1	u	0	0	1	0	0	0	1	0	1	0	0	0	1	0	0	1	1	1	0	1	1	0	0	0	0	1	1	0	1	0	1	0	1	0	0	0	0	0	0	1	0	1	0
-0.0989274	0.995095	1	1	0	0	0	0	1	0	0	0	1	0	0	0	0	1	0	0	0	1	0	0	0	0	0	0	1	1	0	1	0	0	1	0	1	0	1	0	0	1	0	1	0	1	0	0	0	0
-0.913013	0.407931	1	1	0	0	0	0	1	0	1	1	1	1	1	0	1	1	1	1	1	1	1	0	0	0	1	1	1	1	1	1	1	1	1	u	1	1	1	0	1	1	1	1	1	1	1	0	1	1
-0.274998	-0.961445	0	0	1	1	1	0	0	1	u	0	0	1	0	1	1	0	1	1	0	0	1	1	1	0	1	1	0	0	0	0	1	1	0	1	0	1	0	1	u	0	0	0	1	0	1	1	1	0
0.134058	0.990973	0	0	0	0	0	0	0	0	0	0	0	0	0	0	0	0	0	0	0	0	0	0	0	0	0	0	0	0	0	0	0	0	0	0	0	0	0	0	0	0	0	0	0	0	0	0	0	0
0.397789	-0.917477	0	0	1	1	1	1	0	1	1	1	0	1	0	1	1	0	1	1	1	0	1	1	1	1	1	1	0	0	1	0	1	1	0	1	0	1	0	1	1	0	1	0	0	0	1	1	1	u
0.701276	-0.71289	0	0	1	1	1	0	0	1	0	0	0	0	0	1	0	0	0	1	0	0	0	1	1	0	0	1	0	0	0	0	0	0	0	u	0	0	0	1	0	0	0	0	0	0	0	0	0	0
0.902045	0.431642	0	1	1	1	1	1	0	0	0	1	1	0	0	1	0	1	0	0	1	1	0	1	1	1	0	0	1	0	1	0	0	0	0	1	1	0	1	0	0	0	0	1	0	1	0	1	0	0
0.310529	-0.950564	0	0	1	1	1	1	0	1	1	1	0	1	0	1	1	0	1	1	1	0	1	1	1	1	1	1	0	0	1	0	1	1	0	1	1	1	0	1	1	0	1	0	1	0	1	1	1	1
0.918181	-0.396162	0	1	1	1	1	1	0	1	1	1	1	1	0	1	0	0	0	1	1	1	1	1	1	1	1	1	0	0	1	0	0	0	0	1	1	0	1	1	1	0	0	1	0	0	0	1	0	0
-0.977519	0.210847	1	1	0	0	0	0	1	1	1	1	1	1	1	0	1	1	1	1	1	1	1	0	0	0	1	1	1	1	1	1	1	1	1	1	1	1	1	1	1	1	1	1	1	1	1	1	1	1
0.425338	-0.905035	0	0	1	1	1	0	0	1	0	1	0	1	0	1	0	0	0	1	0	0	1	1	1	0	1	1	0	0	0	0	0	0	0	1	0	0	0	1	0	0	0	0	0	0	1	1	0	0
0.0377127	0.999289	0	0	0	0	0	0	0	0	0	0	0	0	0	0	0	1	0	0	0	0	0	0	0	0	0	0	0	0	0	0	0	0	0	0	0	0	0	0	0	0	0	0	0	0	0	0	0	0
0.988016	-0.154353	0	u	1	1	1	1	0	1	0	1	0	0	0	1	0	0	0	1	1	1	0	1	1	1	0	0	0	0	1	0	0	0	0	1	0	0	1	1	0	0	0	0	0	0	0	1	0	0
-0.862699	0.505719	1	1	0	0	0	0	1	u	1	1	1	1	1	0	1	1	1	1	1	1	1	0	0	0	1	1	1	1	1	1	1	1	1	1	1	1	1	0	1	1	1	1	1	1	1	1	1	1
-0.961499	-0.274808	0	0	0	0	0	0	0	0	0	0	0	0	0	0	0	0	0	0	0	0	0	0	0	0	0	0	0	0	0	0	u	1	0	0	0	u	0	0	0	0	0	0	0	0	u	0	0	0
-0.835566	0.54939	1	1	0	0	0	0	1	0	0	0	1	0	1	0	1	1	1	0	0	0	1	0	0	0	u	0	1	1	0	1	1	1	1	0	1	1	0	0	0	1	1	1	1	1	1	0	1	1
-0.263466	-0.964669	1	0	1	1	1	0	0	1	1	1	0	1	1	1	1	0	1	1	0	0	1	1	1	0	1	1	0	0	0	0	1	1	0	1	0	1	0	1	1	0	1	0	1	0	1	1	1	1
-0.297872	0.954606	1	1	0	0	0	0	1	0	0	0	1	0	1	0	1	1	1	0	1	1	0	0	0	u	0	0	1	1	0	1	0	0	1	0	1	1	1	0	0	1	1	1	1	1	0	0	0	1
-0.751	0.660303	1	1	0	0	0	0	1	0	0	0	1	0	1	0	1	1	1	0	0	1	1	0	0	0	1	0	1	1	0	1	1	1	1	0	1	1	1	0	0	1	1	1	1	1	1	0	1	1
-0.700163	0.713983	1	1	0	0	0	1	1	0	1	1	1	1	1	0	1	1	1	0	1	1	1	0	0	1	1	0	1	1	1	1	1	1	1	1	1	1	1	0	1	1	1	1	1	1	1	1	1	1
-0.284199	-0.958765	1	0	1	1	1	0	1	1	1	1	1	1	1	1	1	0	1	1	1	0	1	1	1	0	1	1	1	1	1	1	1	1	1	1	1	1	0	1	1	1	1	0	1	1	1	1	1	1
0.979918	0.199402	u	1	1	1	1	1	1	1	1	1	1	1	1	1	0	1	1	1	1	1	0	1	1	1	u	1	1	1	1	1	0	0	1	1	1	0	1	1	1	1	1	1	0	1	0	1	0	1
-0.563817	0.8259	1	1	0	0	0	0	1	0	0	0	1	0	1	0	1	1	u	0	0	1	0	0	0	0	0	0	1	1	0	1	1	0	1	0	1	1	1	0	0	1	1	1	1	1	0	0	1	1
-0.844589	0.535415	1	0	0	0	0	0	u	0	0	0	0	0	1	0	u	1	0	0	0	0	0	0	0	0	0	0	0	1	0	1	1	u	1	0	0	1	0	0	0	1	0	0	1	0	0	0	1	0
0.919079	-0.394074	1	1	1	1	1	1	1	1	1	1	1	1	1	1	1	1	1	1	1	1	1	1	1	1	1	1	1	0	1	1	1	1	0	1	1	0	1	1	1	1	1	1	0	1	1	1	1	1
0.763075	0.64631	1	1	1	1	1	1	1	1	1	1	1	1	1	1	1	1	1	1	1	1	1	1	1	1	1	1	1	1	1	1	0	0	1	1	1	0	1	1	1	1	1	1	1	1	0	1	0	1
0.489683	0.871901	1	1	1	1	1	1	1	0	1	1	1	0	1	u	0	1	1	0	1	1	0	1	1	1	0	0	1	1	1	1	0	0	1	1	1	0	1	0	1	1	1	1	0	1	0	1	0	1
0.0557699	-0.998444	0	0	0	0	0	0	0	1	0	0	0	0	0	1	0	0	0	1	0	0	0	u	0	0	0	1	0	0	0	0	0	0	0	0	0	0	0	1	0	0	0	0	0	0	1	0	0	0
-0.881132	-0.47287	1	0	0	1	u	0	1	1	1	1	1	1	1	1	1	1	1	1	1	0	1	1	1	0	1	1	1	1	1	1	1	1	1	1	1	1	0	1	1	1	1	0	1	1	1	1	1	1
0.24709	-0.968993	0	0	1	1	1	0	0	1	0	0	0	1	0	1	0	0	0	1	0	0	0	1	1	0	0	1	0	0	0	0	0	0	0	u	0	0	0	1	0	0	0	0	0	0	1	0	0	0
-0.604718	0.79644	1	1	0	0	0	1	1	1	1	1	1	1	1	0	1	1	1	u	1	1	1	0	0	1	1	1	1	1	1	1	1	1	1	1	1	1	1	0	1	1	1	1	1	1	1	1	1	1
-0.775523	0.63132	1	0	0	0	0	0	0	0	0	0	0	0	0	0	0	1	0	0	0	0	0	0	0	0	0	0	0	1	0	u	0	0	1	0	0	u	0	0	0	1	0	0	1	0	0	0	0	0
0.462826	-0.886449	0	0	1	1	1	0	0	1	0	0	0	u	0	1	0	0	0	1	0	0	0	1	1	0	0	1	0	0	0	0	0	0	0	1	0	0	0	1	0	0	0	0	0	0	0	u	0	0
-0.835208	0.549934	1	0	0	0	0	0	1	0	0	0	0	0	1	0	1	1	0	0	0	0	0	0	0	0	0	0	0	1	0	1	1	1	1	0	0	1	0	0	0	1	0	0	1	u	0	0	1	0
-0.313539	-0.949575	0	0	u	1	1	0	0	1	0	0	0	1	0	1	1	0	1	1	0	0	1	1	1	0	1	1	0	0	0	0	1	1	0	1	0	1	0	1	0	0	0	0	1	0	1	0	1	0
-0.730062	-0.683381	1	1	1	1	1	0	1	1	1	1	1	1	1	1	1	1	1	1	1	u	1	1	1	0	1	1	1	1	1	1	1	1	1	1	1	1	0	1	1	1	1	1	1	1	1	1	1	1
-0.932669	0.360732	1	1	0	0	0	0	1	1	1	1	1	1	1	0	1	1	1	1	1	1	1	0	0	u	1	1	1	1	1	1	1	1	1	1	1	1	1	1	1	1	1	1	1	1	1	1	1	1
-0.65816	-0.752878	1	0	1	1	1	0	1	1	1	1	1	1	1	1	1	1	1	1	1	0	1	1	1	0	1	1	1	1	1	1	1	1	1	1	1	1	0	1	1	1	1	0	1	1	1	1	1	1
-0.981772	0.190062	u	0	0	0	0	0	0	0	0	0	0	0	0	0	0	0	0	0	0	0	0	0	0	0	0	0	0	1	0	0	1	1	1	0	0	1	0	0	0	0	0	0	1	0	0	0	1	0
-0.54094	0.841061	1	1	0	0	0	0	1	0	1	0	1	0	1	0	1	1	1	0	1	1	u	0	0	0	0	0	1	1	1	1	1	1	1	0	1	1	1	0	u	1	1	1	1	1	0	0	1	1
0.97681	-0.214106	0	0	u	0	0	u	0	0	0	0	0	0	0	0	0	0	0	0	0	0	0	u	0	0	0	0	0	0	0	0	0	0	0	0	0	0	0	0	0	0	0	0	0	0	0	0	0	0
0.773742	0.633501	1	1	1	1	1	1	1	1	1	1	1	1	1	1	0	1	u	0	1	1	0	1	1	1	0	0	1	1	1	1	0	0	1	1	1	0	1	1	1	1	1	1	0	1	0	1	0	1
-0.968992	-0.247091	0	0	0	0	0	0	0	0	0	0	0	0	0	0	1	0	0	0	0	0	u	0	0	0	0	0	0	0	0	0	1	1	0	0	0	1	0	0	0	0	0	0	1	0	1	0	1	0
0.381354	0.924429	0	1	0	0	0	1	1	0	0	0	1	0	0	0	0	1	0	0	1	1	0	0	0	1	0	0	1	1	1	1	0	0	1	0	1	0	1	0	0	1	0	1	0	1	0	0	0	0
-0.992778	-0.119965	1	0	0	0	0	0	0	0	0	0	0	0	1	0	1	0	1	0	0	0	1	0	0	0	1	0	0	1	0	u	1	1	1	0	0	1	0	0	0	1	0	0	1	0	1	0	1	0
0.734092	-0.67905	0	0	1	u	u	0	0	0	0	0	0	0	0	1	0	0	0	0	0	0	0	1	1	0	0	0	0	0	0	0	0	0	0	0	0	0	0	0	0	0	0	0	0	0	0	0	0	0
-0.0385645	0.999256	1	1	1	1	1	1	1	1	1	1	1	1	1	1	1	1	1	0	1	1	1	1	1	1	1	0	1	1	1	1	1	1	1	1	1	1	1	u	1	1	1	1	1	1	1	1	1	1
0.959366	-0.282165	1	1	1	1	1	1	1	1	1	1	1	1	1	1	1	1	1	1	1	1	1	1	1	1	1	1	1	0	1	1	0	1	0	1	1	0	1	1	1	1	1	1	0	1	1	1	1	1
-0.1107	0.993854	1	1	0	0	0	1	1	0	1	1	1	0	1	0	1	1	1	0	1	1	0	0	0	1	0	0	1	1	1	1	1	0	1	0	1	1	1	0	1	1	1	1	1	1	0	0	1	1
0.143146	-0.989702	1	1	1	1	1	1	1	1	1	1	1	1	1	1	1	u	1	1	1	1	1	1	1	1	1	1	1	1	1	1	1	1	1	1	1	1	1	1	1	1	1	1	1	1	1	1	1	1
-0.983331	-0.181827	0	0	0	0	0	0	0	0	0	0	0	0	0	0	0	0	0	0	0	0	0	0	0	0	0	0	0	0	0	0	1	1	0	0	0	1	0	0	0	0	0	0	1	0	1	0	1	0
0.999373	-0.0354055	0	1	1	1	1	1	0	1	0	1	0	0	0	1	0	0	0	0	1	1	0	1	1	1	0	0	0	0	1	0	0	0	0	1	0	0	1	1	0	0	0	u	0	0	0	1	0	0
-0.479545	0.877517	1	1	0	0	0	1	1	0	1	1	1	1	1	0	1	1	1	0	1	1	1	0	0	1	1	0	1	1	1	1	1	1	1	u	1	1	1	0	1	1	1	1	1	1	1	1	1	1
0.967455	0.253043	0	1	1	1	1	1	0	1	1	1	1	0	0	1	0	0	0	0	1	1	0	1	1	1	0	0	1	0	1	0	0	0	0	1	1	0	1	1	1	0	0	1	0	1	0	1	0	0
0.284158	0.958777	1	1	0	0	0	1	1	0	0	u	1	0	1	0	0	1	0	0	1	1	0	0	0	1	0	0	1	1	1	1	0	0	1	0	1	0	1	0	0	1	0	1	0	1	0	0	0	1
-0.975846	0.218459	0	0	0	0	0	0	0	0	0	0	0	0	0	0	0	0	0	0	0	0	0	0	0	0	0	0	0	0	0	0	1	0	0	0	0	1	0	0	0	0	0	0	1	0	0	0	0	0
0.927999	-0.372583	1	1	1	1	1	1	1	1	1	1	1	1	1	1	1	1	1	1	1	1	1	1	1	1	1	1	1	1	1	1	1	1	1	1	1	1	1	1	1	1	1	1	u	1	1	1	1	1
0.540564	0.841303	0	1	0	0	0	1	0	0	0	0	1	0	0	0	0	1	0	0	1	1	0	0	0	1	0	0	1	u	1	1	0	0	1	0	1	0	1	0	0	u	0	1	0	1	0	0	0	0
0.999934	0.0115177	0	1	1	1	1	1	0	u	0	1	0	0	0	1	0	0	0	0	1	1	0	1	1	1	0	0	0	0	1	0	0	0	0	1	0	0	1	0	0	0	0	0	0	0	0	1	0	0
-0.884875	0.465829	1	1	0	1	u	1	1	1	1	1	1	1	1	0	1	1	1	1	1	1	1	0	u	1	1	1	1	1	1	1	1	1	1	1	1	1	1	1	1	1	1	1	1	1	1	1	1	1
0.816754	-0.576986	0	0	1	0	0	0	0	0	0	0	0	0	0	1	0	0	0	0	0	0	0	1	0	0	0	0	0	0	0	0	0	0	0	0	0	0	0	0	0	0	0	0	0	0	0	0	0	0
0.501229	-0.865315	0	0	1	1	1	1	0	1	1	1	1	1	0	1	1	0	1	1	1	0	1	1	1	1	1	1	0	0	1	0	1	1	0	1	1	1	0	1	1	0	1	0	0	0	1	1	1	1
0.725074	0.68867	1	1	1	1	1	1	1	1	1	1	1	1	1	1	1	1	1	1	1	1	1	1	1	1	1	1	1	1	1	1	u	0	1	1	1	1	1	1	1	1	1	1	1	1	0	1	1	1
0.908914	-0.416983	0	1	1	1	1	1	0	1	1	1	1	1	0	1	0	0	0	1	1	1	0	1	1	1	0	1	0	0	1	0	0	0	0	1	1	0	1	1	1	0	0	0	0	0	0	1	0	0
0.998785	0.0492702	0	1	1	1	1	1	0	1	1	1	1	1	0	1	0	0	0	1	1	1	0	1	1	1	0	0	u	0	1	0	0	0	0	1	1	0	1	1	1	0	0	1	0	0	0	1	0	0
0.461122	-0.887337	0	0	1	1	1	0	0	1	0	0	0	0	0	1	0	0	0	1	0	0	0	1	1	0	0	1	0	0	0	0	0	0	0	u	0	0	0	1	0	0	0	0	0	0	0	0	0	0
[truncated: 55 more columns]

## Sheet: 30
		0	1	2	3	4	5	6	7	8	9	10	11	12	13	14	15	16	17	18	19	20	21	22	23	24	25	26	27	28	29	30	31	32	33	34	35	36	37	38	39	40	41	42	43	44	45	46	47
-0.853154	-0.521659	1	0	0	0	0	0	0	0	0	0	0	0	1	0	1	0	1	1	0	0	1	0	0	0	1	1	0	0	0	0	1	1	0	0	0	1	0	u	0	0	0	0	1	0	1	0	1	0
-0.993395	0.114744	1	1	0	1	u	0	1	1	1	1	1	1	1	1	1	1	1	1	1	1	1	u	1	0	1	1	1	1	1	1	1	1	1	1	1	1	1	1	1	1	1	1	1	1	1	1	1	1
-0.775656	0.631156	1	u	0	0	0	0	1	0	0	0	0	0	1	0	1	1	1	0	0	0	0	0	0	0	0	0	1	1	0	1	1	1	1	0	0	1	0	0	0	1	u	1	1	1	0	0	1	1
0.892825	0.450404	0	1	1	1	1	1	0	0	0	1	1	0	0	1	0	0	0	0	1	1	0	1	1	1	0	0	0	0	1	0	0	0	0	0	1	0	1	0	0	0	0	1	0	0	0	1	0	0
0.661753	-0.749722	0	0	1	1	1	u	0	1	0	0	0	u	0	1	0	0	0	1	0	0	0	1	1	0	0	1	0	0	0	0	0	0	0	1	0	0	0	1	0	0	0	0	0	0	0	1	0	0
0.755804	-0.654798	0	u	1	1	1	1	0	1	1	1	1	1	0	1	0	0	u	1	1	1	1	1	1	1	1	1	0	0	1	0	0	u	0	1	1	0	1	1	1	0	u	0	0	0	1	1	0	0
-0.925281	-0.379283	1	0	0	0	0	0	1	1	1	0	0	1	1	0	1	1	1	1	0	0	1	0	0	0	1	1	1	1	0	1	1	1	1	0	0	1	0	1	1	1	1	0	1	1	1	0	1	1
-0.609215	-0.793005	1	0	0	1	0	0	u	1	1	0	0	1	1	1	1	0	1	1	0	0	1	1	1	0	1	1	0	u	0	0	1	1	0	1	0	1	0	1	1	0	1	0	1	0	1	u	1	1
-0.743892	-0.6683	1	0	0	u	0	0	1	1	1	0	0	1	1	1	1	0	1	1	0	0	1	0	0	0	1	1	0	1	0	1	1	1	1	1	0	1	0	1	1	1	1	0	1	0	1	u	1	1
0.998313	-0.0580601	0	0	1	u	1	1	0	0	0	0	0	0	0	1	0	0	0	0	0	0	0	1	1	1	0	0	0	0	0	0	0	0	0	0	0	0	0	0	0	0	0	0	0	0	0	0	0	0
-0.797942	-0.602734	1	0	0	0	0	0	1	1	1	0	0	1	1	u	1	0	1	1	0	0	1	0	0	0	1	1	0	1	0	1	1	1	1	1	0	1	0	1	1	1	1	0	1	0	1	0	1	1
0.1061	-0.994355	0	0	1	1	1	1	0	1	1	1	0	1	1	1	1	0	1	1	1	0	1	1	1	1	1	1	0	0	1	0	1	1	0	1	0	1	0	1	1	0	1	0	1	0	1	1	1	1
-0.881188	0.472766	1	0	0	0	0	0	1	0	0	0	0	0	1	0	1	1	1	0	0	0	0	0	0	0	0	0	u	1	0	1	1	1	1	0	0	1	0	0	0	1	u	0	1	1	0	0	1	1
0.730505	-0.682907	0	u	1	1	1	1	0	1	1	1	1	1	0	1	u	0	1	1	1	1	1	1	1	1	1	1	0	0	1	0	0	1	0	1	1	0	1	1	1	0	1	u	0	0	1	1	u	1
0.839147	0.543904	0	1	1	1	1	1	0	0	0	1	1	0	0	1	0	1	0	0	1	1	0	1	1	1	0	0	u	0	1	0	0	0	0	0	1	0	1	0	0	0	0	1	0	u	0	1	0	0
0.949548	0.313622	0	1	1	u	1	1	0	0	0	0	0	0	0	0	0	0	0	0	0	1	0	1	1	1	0	0	0	0	u	0	0	0	0	0	0	0	1	0	0	0	0	0	0	0	0	0	0	0
0.885481	0.464676	0	1	1	1	1	1	1	1	1	1	1	1	0	1	0	1	0	0	1	1	0	1	1	1	0	0	1	1	1	1	0	0	1	1	1	0	1	1	1	1	1	1	0	1	0	1	0	1
0.999592	0.0285473	0	1	1	1	1	1	0	1	0	1	1	0	0	1	0	0	0	0	1	1	0	1	1	1	0	0	0	0	1	0	0	0	0	1	u	0	1	1	u	0	0	1	0	0	0	1	0	0
-0.65339	0.757021	1	1	0	0	0	0	1	0	0	0	1	0	1	0	1	1	1	0	0	1	0	0	0	0	0	0	1	1	0	1	1	u	1	0	1	1	1	0	0	1	1	1	1	1	0	0	1	1
0.554947	0.831886	0	1	0	0	0	1	0	0	0	0	1	0	0	0	0	1	0	0	0	1	0	0	0	1	0	0	u	0	u	0	0	0	0	0	0	0	1	0	0	0	0	1	0	u	0	0	0	0
-0.652795	-0.757535	1	0	0	u	0	0	u	1	1	0	0	1	1	1	1	0	1	1	0	0	1	0	0	0	1	1	0	u	0	0	1	1	0	1	0	1	0	1	1	0	1	0	1	0	1	0	1	1
0.961308	0.275477	0	1	1	1	1	1	0	0	0	u	u	0	0	1	0	0	0	0	1	1	0	1	1	1	0	0	0	0	1	0	0	0	0	0	0	0	1	0	0	0	0	1	0	0	0	1	0	0
0.917184	-0.398464	0	1	1	1	1	1	0	1	1	1	1	1	0	1	0	0	u	1	1	1	1	1	1	1	1	1	1	0	1	0	0	0	0	1	1	0	1	1	1	0	1	1	0	1	1	1	0	u
0.863298	-0.504695	0	1	1	1	1	1	0	1	1	1	1	1	0	1	0	0	u	1	1	1	1	1	1	1	1	1	1	0	1	0	0	0	0	1	1	0	1	1	1	0	1	1	0	u	1	1	0	u
-0.481276	0.876569	1	1	0	0	0	1	1	0	1	u	1	0	1	0	1	1	1	0	1	1	1	0	0	1	u	0	1	1	1	1	1	1	1	0	1	1	1	0	1	1	1	1	1	1	0	0	1	1
-0.732846	-0.680395	1	0	0	1	u	0	1	1	1	1	0	1	1	1	1	0	1	1	0	0	1	1	1	0	1	1	u	1	0	1	1	1	1	1	0	1	0	1	1	1	1	0	1	u	1	1	1	1
-0.189704	0.981841	1	1	0	0	0	1	1	0	0	0	1	0	1	0	1	1	u	0	1	1	0	0	0	1	0	0	1	1	1	1	0	0	1	0	1	u	1	0	0	1	1	1	1	1	0	0	0	1
-0.945188	-0.326526	1	0	0	0	0	0	1	0	0	0	0	u	1	0	1	0	1	1	0	0	1	0	0	0	1	1	0	1	0	1	1	1	1	0	0	1	0	0	0	1	1	0	1	0	1	0	1	1
0.991422	0.130697	0	1	1	1	1	1	1	1	1	1	1	1	0	1	0	1	0	1	1	1	0	1	1	1	0	1	1	0	1	u	0	0	0	1	1	0	1	1	1	0	u	1	0	1	0	1	0	u
0.817048	0.576569	1	1	1	1	1	1	1	1	1	1	1	1	u	1	0	1	0	0	1	1	0	1	1	1	0	0	1	1	1	1	0	0	1	1	1	0	1	u	1	1	1	1	0	1	0	1	0	1
-0.939848	0.341594	1	0	0	0	0	0	u	0	0	0	0	0	1	0	1	1	u	0	0	0	0	0	0	0	0	0	0	1	0	1	1	1	1	0	0	1	0	0	0	1	0	0	1	0	0	0	1	0
-0.971666	0.236359	1	1	0	0	0	0	1	0	1	0	1	1	1	0	1	1	1	0	0	0	1	0	0	0	1	1	1	1	0	1	1	1	1	0	1	1	0	0	1	1	1	1	1	1	1	0	1	1
-0.19481	-0.980841	1	u	1	1	1	1	1	1	1	1	1	1	1	1	1	0	1	1	1	u	1	1	1	1	1	1	1	1	1	1	1	1	1	1	1	1	0	1	1	1	1	u	1	1	1	1	1	1
-0.466026	0.884771	1	1	0	0	0	0	1	0	0	0	1	0	1	0	1	1	1	0	u	1	0	0	0	0	0	0	1	1	0	1	1	0	1	0	1	1	1	0	0	1	1	1	1	1	0	0	1	1
0.722347	0.691531	0	1	0	0	0	1	0	0	0	0	1	0	0	0	0	1	0	0	u	1	0	0	0	1	0	0	0	0	1	0	0	0	0	0	0	0	1	0	0	0	0	1	0	0	0	0	0	0
0.536252	-0.844058	0	0	1	1	1	1	0	1	u	1	0	1	0	1	0	0	0	1	0	0	1	1	1	1	1	1	0	0	u	0	0	0	0	1	0	0	0	1	1	0	0	0	0	0	1	1	0	0
-0.917198	-0.398431	0	0	0	0	0	0	0	0	0	0	0	0	0	0	0	0	0	0	0	0	0	0	0	0	0	0	0	0	0	0	1	1	0	0	0	1	0	0	0	0	0	0	1	0	1	0	1	0
0.921798	-0.38767	0	1	1	1	1	1	1	1	1	1	1	1	0	1	u	0	1	1	1	1	1	1	1	1	1	1	1	0	1	0	0	0	0	1	1	0	1	1	1	0	1	1	0	1	1	1	0	1
-0.853389	-0.521275	1	0	0	0	0	0	0	u	0	0	0	1	1	0	1	0	1	1	0	0	1	0	0	0	1	1	0	1	0	0	1	1	u	0	0	1	0	1	0	0	1	0	1	0	1	0	1	1
0.953113	-0.302616	0	0	1	1	1	1	0	1	0	1	0	0	0	1	0	0	0	1	u	u	0	1	1	1	0	0	0	0	1	0	0	0	0	1	0	0	1	1	0	0	0	0	0	0	0	1	0	0
0.666456	-0.745545	1	1	1	1	1	1	1	1	1	1	1	1	1	1	1	0	1	1	1	1	1	1	1	1	1	1	1	0	1	1	1	1	0	1	1	1	1	1	1	1	1	1	1	1	1	1	1	1
0.984874	0.17327	0	0	1	0	u	1	0	0	0	0	0	0	0	0	0	0	0	0	0	0	0	u	0	1	0	0	0	0	0	0	0	0	0	0	0	0	u	0	0	0	0	0	0	0	0	0	0	0
-0.494477	0.869191	0	0	0	0	0	0	0	0	0	0	0	0	0	0	0	1	0	0	0	0	0	0	0	0	0	0	0	1	0	u	0	0	1	0	0	0	0	0	0	1	0	u	0	0	0	0	0	0
0.981048	-0.193765	0	0	1	1	1	1	0	1	0	1	0	0	0	1	0	0	0	0	u	1	0	1	1	1	0	0	0	0	1	0	0	0	0	1	0	0	1	1	0	0	0	0	0	0	0	1	0	0
-0.410173	0.912008	u	1	0	0	0	0	0	0	0	0	0	0	0	0	0	1	0	0	0	u	0	0	0	0	0	0	u	1	0	1	0	0	1	0	0	0	u	0	0	1	0	1	0	1	0	0	0	0
-0.674188	0.73856	1	1	0	0	0	0	1	0	0	0	1	0	1	0	1	1	1	0	0	1	0	0	0	0	0	0	1	1	0	1	1	1	1	0	1	1	1	0	0	1	1	1	1	1	0	0	1	1
0.316914	-0.948454	0	0	0	0	0	0	0	0	0	0	0	0	0	1	0	0	0	u	0	0	0	u	0	0	0	u	0	0	0	0	0	0	0	0	0	0	0	1	0	0	0	0	0	0	0	0	0	0
0.575159	-0.818042	0	0	1	1	1	1	0	1	0	1	0	1	0	1	0	0	0	1	0	0	0	1	1	1	u	1	0	0	0	0	0	0	0	1	0	0	0	1	0	0	0	0	0	0	1	1	0	0
-0.00185062	0.999998	1	1	0	0	u	1	1	0	1	1	1	0	1	0	1	1	1	0	1	1	0	0	0	1	0	0	1	1	1	1	1	0	1	1	1	1	1	0	1	1	1	1	1	1	0	1	1	1
0.426313	0.904576	1	1	1	1	1	1	1	u	1	1	1	1	1	1	1	1	1	0	1	1	0	1	1	1	0	0	1	1	1	1	0	0	1	1	1	u	1	0	1	1	1	1	1	1	0	1	u	1
0.998237	0.0593595	0	0	u	0	0	1	0	0	0	0	0	0	0	0	0	0	0	0	0	0	0	0	0	1	0	0	0	0	0	0	0	0	0	0	0	0	0	0	0	0	0	0	0	0	0	0	0	0
-0.950924	-0.309425	1	0	0	0	0	0	1	1	1	0	0	1	1	0	1	1	1	1	0	0	1	0	0	0	1	1	1	1	0	1	1	1	1	0	0	1	0	1	1	1	1	0	1	1	1	0	1	1
-0.758847	-0.651269	0	0	0	0	0	0	0	0	0	0	0	0	0	0	0	0	0	0	0	0	0	0	0	0	0	0	0	0	0	0	0	1	0	0	0	0	0	0	0	0	0	0	0	0	1	0	0	0
0.700473	0.713679	0	1	1	0	1	1	0	0	0	1	1	0	0	0	0	1	0	0	1	1	0	u	u	1	0	0	1	0	1	0	0	0	0	0	1	0	1	0	0	0	0	1	0	1	0	u	0	0
0.280601	-0.959824	0	0	1	1	1	0	0	1	1	1	0	1	0	1	0	0	0	1	0	0	1	1	1	0	1	1	0	0	0	0	0	1	0	1	0	0	0	1	1	0	0	0	0	0	1	1	0	0
0.563585	0.826058	0	1	1	0	u	1	1	0	0	1	1	0	0	0	0	1	0	0	1	1	0	0	0	1	0	0	1	1	1	1	0	0	1	0	1	0	1	0	0	1	0	1	0	1	0	u	0	0
0.54834	0.836255	1	1	1	1	1	1	1	0	1	1	1	0	1	0	0	1	0	0	1	1	0	1	1	1	0	0	1	1	1	1	0	0	1	u	1	0	1	0	1	1	u	1	0	1	0	1	0	1
-0.890924	-0.454153	1	0	0	0	0	0	1	1	1	0	0	1	1	0	1	0	1	1	0	0	1	0	0	0	1	1	0	1	0	1	1	1	1	0	0	1	0	1	u	1	1	0	1	0	1	0	1	1
0.987384	-0.158343	0	0	1	1	1	1	0	0	0	0	0	0	0	1	0	0	0	0	0	0	0	1	1	1	0	0	0	0	0	0	0	0	0	0	0	0	0	0	0	0	0	0	0	0	0	0	0	0
0.924513	-0.381151	0	0	1	1	1	1	0	1	u	1	0	1	0	1	0	0	0	1	1	1	0	1	1	1	0	1	0	0	1	0	0	0	0	1	0	0	1	1	1	0	0	0	0	0	0	1	0	0
0.686761	0.726884	1	1	1	1	1	1	1	1	1	1	1	1	1	1	1	1	1	1	1	1	0	1	1	1	0	0	1	1	1	1	0	0	1	1	1	0	1	1	1	1	1	1	1	1	0	1	0	1
-0.295675	-0.955289	1	u	1	1	1	1	1	1	1	1	1	1	1	1	1	1	1	1	1	0	1	1	1	1	1	1	1	1	1	1	1	1	1	1	1	1	0	1	1	1	1	1	1	1	1	1	1	1
0.622068	0.782964	0	1	0	0	0	1	0	0	0	0	1	0	0	0	0	1	0	0	0	1	0	0	0	1	0	0	0	0	u	0	0	0	0	0	0	0	1	0	0	0	0	1	0	0	0	0	0	0
0.956488	0.291772	0	1	1	1	1	1	1	1	1	1	1	1	u	1	0	1	0	1	1	1	0	1	1	1	0	1	1	u	1	1	0	0	u	1	1	0	1	1	1	1	1	1	0	1	0	1	0	1
0.422506	-0.90636	0	0	1	1	1	1	0	1	1	1	0	1	0	1	0	0	0	1	u	0	1	1	1	1	1	1	0	0	1	0	0	1	0	1	0	0	0	1	1	0	0	0	0	0	1	1	0	0
0.599701	0.800224	0	1	0	0	0	1	0	0	0	0	1	0	0	0	0	1	0	0	1	1	0	0	0	1	0	0	1	0	1	0	0	0	0	0	1	0	1	0	0	0	0	1	0	1	0	0	0	0
-0.521368	0.853332	1	1	0	0	0	0	1	0	0	0	1	0	1	0	1	1	1	0	0	1	0	0	0	0	0	0	1	1	0	1	1	0	1	0	1	1	1	0	0	1	1	1	1	1	0	0	1	1
0.445241	-0.895411	0	0	1	1	1	1	0	1	1	1	0	1	0	1	0	0	u	1	1	0	1	1	1	1	1	1	0	0	1	0	0	1	0	1	0	0	0	1	1	0	0	0	0	0	1	1	u	0
-0.555545	-0.831487	1	0	1	1	1	0	1	1	1	1	1	1	1	1	1	u	1	1	1	0	1	1	1	0	1	1	1	1	1	1	1	1	1	1	1	1	0	1	1	1	1	0	1	1	1	1	1	1
-0.941828	-0.336094	0	0	0	0	0	0	0	0	0	0	0	0	0	0	u	0	0	0	0	0	u	0	0	0	u	0	0	0	0	0	1	1	0	0	0	1	0	0	0	0	0	0	1	0	1	0	1	0
-0.067343	0.99773	1	1	0	0	0	1	1	0	0	0	1	0	1	0	0	1	0	0	u	1	0	0	0	1	0	0	1	1	0	1	0	0	1	0	1	0	1	0	0	1	0	1	0	1	0	0	0	u
-0.434087	0.900871	1	1	0	0	0	0	1	0	0	0	1	0	1	0	0	1	0	0	0	1	0	0	0	0	0	0	1	1	0	1	0	0	1	0	u	u	1	0	0	1	0	1	1	1	0	0	0	u
-0.182913	-0.983129	1	0	1	1	1	0	1	1	1	1	0	1	1	1	1	0	1	1	1	0	1	1	1	0	1	1	0	0	1	u	1	1	0	1	1	1	0	1	1	u	1	0	1	0	1	1	1	1
0.29013	0.956987	1	1	u	0	u	1	1	0	1	1	1	0	1	0	0	1	u	0	1	1	0	0	0	1	0	0	1	1	1	1	0	0	1	0	1	0	1	0	1	1	1	1	0	1	0	1	0	1
0.119567	-0.992826	1	0	1	1	1	1	1	1	1	1	u	1	1	1	1	0	1	1	1	0	1	1	1	1	1	1	0	0	1	0	1	1	0	1	1	1	0	1	1	0	1	0	1	0	1	1	1	1
0.245134	0.969489	0	1	0	0	0	1	0	0	0	0	1	0	0	0	0	1	0	0	0	1	0	0	0	1	0	0	u	0	0	0	0	0	1	0	0	0	1	0	0	0	0	1	0	u	0	0	0	0
-0.990561	0.137074	1	0	0	0	0	0	0	0	0	0	0	0	u	0	1	0	0	0	0	0	0	0	0	0	0	0	0	1	0	0	1	1	1	0	0	1	0	0	0	u	0	0	1	0	1	0	1	0
0.926126	0.377214	0	u	1	0	u	1	0	0	0	0	0	0	0	0	0	0	0	0	0	1	0	u	0	1	0	0	0	0	0	0	0	0	0	0	0	0	1	0	0	0	0	0	0	0	0	0	0	0
0.87368	0.486502	1	1	1	1	1	1	1	1	1	1	1	1	1	1	1	1	1	1	1	1	1	1	1	1	1	1	1	1	1	1	0	0	1	1	1	0	1	1	1	1	1	1	u	1	0	1	0	1
-0.594773	-0.803894	0	0	0	0	0	0	0	0	0	0	0	0	0	0	0	0	0	1	0	0	1	0	0	0	1	1	0	0	0	0	1	1	0	0	0	1	0	1	0	0	0	0	1	0	1	0	1	0
-0.477192	-0.878799	1	0	1	1	1	0	0	1	1	0	0	1	1	1	1	0	1	1	0	0	1	1	1	0	1	1	0	0	0	0	1	1	0	1	0	1	0	1	1	0	1	0	1	0	1	1	1	1
0.658734	0.752376	0	1	0	0	0	1	0	0	0	0	1	0	0	0	0	1	0	0	1	1	0	0	0	1	0	0	u	0	1	0	0	0	0	0	1	0	1	0	0	0	0	1	0	u	0	0	0	0
0.655263	-0.7554	0	0	1	1	1	1	0	1	0	1	0	1	0	1	0	0	0	1	0	0	0	1	1	1	0	1	0	0	0	0	0	0	0	1	0	0	0	1	0	0	0	0	0	0	0	1	0	0
0.194143	0.980973	0	1	0	0	0	0	0	0	0	0	0	0	0	0	0	1	0	0	0	1	0	0	0	0	0	0	0	0	0	0	0	0	0	0	0	0	1	0	0	0	0	u	0	0	0	0	0	0
0.132028	-0.991246	0	0	1	1	1	0	0	1	0	0	0	1	0	1	0	0	0	1	0	0	0	1	1	0	u	1	0	0	0	0	0	u	0	0	0	0	0	1	0	0	0	0	0	0	1	0	0	0
0.859262	0.511536	1	1	1	1	1	1	1	1	1	1	1	1	1	1	0	1	u	1	1	1	0	1	1	1	0	0	1	1	1	1	0	0	1	1	1	0	1	1	1	1	1	1	0	1	0	1	0	1
0.269462	0.963011	0	1	0	0	0	0	0	0	0	0	0	0	0	0	0	1	0	0	0	1	0	0	0	0	0	0	0	0	0	0	0	0	0	0	0	0	1	0	0	0	0	1	0	0	0	0	0	0
-0.986635	-0.162947	1	1	0	1	0	0	1	1	1	1	1	1	1	1	1	1	1	1	1	u	1	0	u	0	1	1	1	1	1	1	1	1	1	1	1	1	0	1	1	1	1	1	1	1	1	1	1	1
-0.0547704	0.998499	1	1	0	0	0	1	1	0	u	u	1	0	1	0	1	1	1	0	1	1	0	0	0	1	0	0	1	1	1	1	0	0	1	0	1	u	1	0	u	1	1	1	1	1	0	0	0	1
0.119976	-0.992777	0	0	0	0	0	0	0	u	0	0	0	0	0	1	0	0	0	1	0	0	0	u	0	0	0	1	0	0	0	0	0	0	0	0	0	0	0	1	0	0	0	0	0	0	1	0	0	0
0.139839	0.990174	0	1	0	0	0	0	0	0	0	0	0	0	0	0	0	1	0	0	0	1	0	0	0	0	0	0	0	0	0	0	0	0	0	0	0	0	1	0	0	0	0	1	0	0	0	0	0	0
-0.0445126	-0.999009	1	1	1	1	1	1	1	1	1	1	1	1	1	1	1	u	1	1	1	1	1	1	1	1	1	1	1	1	1	1	1	1	1	1	1	1	1	1	1	1	1	1	1	1	1	1	1	1
0.199774	0.979842	1	1	1	1	1	1	1	1	1	1	1	1	1	1	1	1	1	1	1	1	1	1	1	1	1	u	1	1	1	1	1	1	1	1	1	1	1	1	1	1	1	1	1	1	0	1	1	1
-0.999967	-0.00809245	1	1	0	0	0	0	1	1	1	1	1	1	1	0	1	1	1	1	1	u	1	0	0	0	1	1	1	1	1	1	1	1	1	1	1	1	0	1	1	1	1	1	1	1	1	1	1	1
-0.231752	0.972775	1	1	u	u	1	1	1	0	1	1	1	1	1	0	1	1	1	0	1	1	1	0	u	1	1	0	1	1	1	1	1	1	1	1	1	1	1	0	1	1	1	1	1	1	1	1	1	1
-0.374939	-0.927049	0	0	1	1	1	0	0	1	1	0	0	1	0	1	1	0	1	1	0	0	1	1	1	0	1	1	0	0	0	0	1	1	0	1	0	1	0	1	1	0	u	0	1	0	1	1	1	u
-0.108998	0.994042	1	1	u	0	1	1	1	0	1	1	1	1	1	0	1	1	1	0	1	1	1	0	u	1	1	0	1	1	1	1	1	1	1	1	1	1	1	0	1	1	1	1	1	1	0	1	1	1
-0.562103	-0.827067	1	0	1	1	1	0	1	1	1	1	0	1	1	1	1	0	1	1	0	0	1	1	1	0	1	1	0	1	0	1	1	1	u	1	0	1	0	1	1	1	1	0	1	0	1	1	1	1
0.419673	-0.907676	0	0	1	1	1	1	0	1	1	1	0	1	0	1	u	0	1	1	1	0	1	1	1	1	1	1	0	0	1	0	1	1	0	1	0	0	0	1	1	0	u	0	0	0	1	1	1	0
0.968587	0.248675	u	1	1	1	1	1	1	1	1	1	1	1	1	1	0	1	1	1	1	1	0	1	1	1	0	1	1	1	1	1	0	0	1	1	1	0	1	1	1	1	1	1	0	1	0	1	0	1
0.362053	0.932157	1	1	1	1	1	1	1	0	1	1	1	0	1	0	1	1	1	0	1	1	0	1	1	1	0	0	1	1	1	1	0	0	1	1	1	0	1	0	1	1	1	1	1	1	0	1	0	1
0.49193	-0.870635	1	1	1	1	1	1	1	1	1	1	1	1	1	1	1	0	1	1	1	1	1	1	1	1	1	1	1	0	1	u	1	1	0	1	1	1	1	1	1	0	1	u	1	1	1	1	1	1
0.98895	-0.148251	0	0	1	1	1	1	0	0	0	0	0	0	0	1	0	0	0	0	0	0	0	1	1	1	0	0	0	0	0	0	0	0	0	0	0	0	0	0	0	0	0	0	0	0	0	0	0	0
0.979536	0.201267	0	1	1	1	1	1	1	1	1	1	1	1	0	1	0	1	0	1	1	1	0	1	1	1	0	1	1	0	1	1	0	0	0	1	1	0	1	1	1	1	1	1	0	1	0	1	0	1
0.782156	-0.623082	0	0	1	1	1	0	0	u	0	0	0	0	0	1	0	0	0	0	0	0	0	1	1	0	0	0	0	0	0	0	0	0	0	0	0	0	0	1	0	0	0	0	0	0	0	0	0	0
-0.713795	-0.700355	1	0	1	1	1	0	1	1	1	1	u	1	1	1	1	1	1	1	1	0	1	1	1	0	1	1	1	1	1	1	1	1	1	1	1	1	0	1	1	1	1	0	1	1	1	1	1	1
-0.215492	0.976506	1	1	0	0	0	1	1	0	1	1	1	0	1	0	1	1	1	0	1	1	0	0	0	1	0	0	1	1	1	1	1	0	1	0	1	1	1	0	1	1	1	1	1	1	0	0	1	1
0.983766	0.179458	0	1	1	1	1	1	0	0	0	0	0	0	0	1	0	0	0	0	u	1	0	1	1	1	0	0	0	0	1	0	0	0	0	0	0	0	1	0	0	0	0	0	0	0	0	u	0	0
-0.591537	0.806278	1	1	0	0	0	u	1	0	1	1	1	0	1	0	1	1	1	0	1	1	1	0	0	1	1	0	1	1	1	1	1	1	1	0	1	1	1	0	1	1	1	1	1	1	1	0	1	1
0.3449	0.93864	0	1	0	0	0	1	0	0	0	0	1	0	0	0	0	1	0	0	u	1	0	0	0	1	0	0	1	u	u	u	0	0	1	0	1	0	1	0	0	u	0	1	0	1	0	0	0	0
0.992578	0.121613	1	1	1	1	1	1	1	1	1	1	1	1	1	1	1	1	1	1	1	1	1	1	1	1	1	1	1	1	1	1	0	0	1	1	1	0	1	1	1	1	1	1	0	1	0	1	u	1
-0.966041	0.258388	1	1	0	0	0	0	1	1	1	1	1	1	1	0	1	1	1	1	1	1	1	0	0	0	1	1	1	1	1	1	1	1	1	1	1	1	1	1	1	1	1	1	1	1	1	1	1	1
-0.297126	0.954838	0	0	0	0	0	0	0	0	0	0	0	0	0	0	0	1	0	0	0	0	0	0	0	0	0	0	0	0	0	0	0	0	0	0	0	0	0	0	0	0	0	0	0	0	0	0	0	0
-0.877108	-0.480293	1	0	0	0	0	0	1	1	1	0	0	1	1	0	1	u	1	1	0	0	1	0	0	0	1	1	1	1	0	1	1	1	1	1	0	1	0	1	1	1	1	0	1	1	1	0	1	1
0.285132	0.958488	0	0	0	0	0	0	0	0	0	0	0	0	0	0	0	0	0	0	0	u	0	0	0	0	0	0	0	0	0	0	0	0	0	0	0	0	1	0	0	0	0	0	0	0	0	0	0	0
0.203518	0.979071	1	1	0	0	0	1	1	0	1	1	1	0	1	0	1	1	1	0	1	1	0	0	0	1	0	0	1	1	1	1	0	0	1	0	1	0	1	0	1	1	1	1	1	1	0	1	0	1
0.727244	-0.686379	u	1	1	1	1	1	1	1	1	1	1	1	1	1	1	0	1	1	1	1	1	1	1	1	1	1	1	0	1	u	1	1	0	1	1	1	1	1	1	u	1	1	0	1	1	1	1	1
0.518368	0.855158	0	1	0	0	0	1	0	0	0	0	1	0	0	0	0	1	0	0	0	1	0	0	0	1	0	0	0	0	0	0	0	0	0	0	0	0	1	0	0	0	0	1	0	0	0	0	0	0
-0.922301	-0.386473	0	0	0	0	0	0	0	0	0	0	0	0	0	0	1	0	u	0	0	0	1	0	0	0	1	0	0	0	0	0	1	1	0	0	0	1	0	0	0	0	0	0	1	0	1	0	1	0
0.15655	-0.98767	0	0	1	1	1	0	0	1	1	1	0	1	0	1	0	0	0	1	0	0	1	1	1	0	1	1	0	0	0	0	1	1	0	1	0	u	0	1	1	0	0	0	0	0	1	1	1	0
0.985117	0.171883	0	1	1	1	1	1	0	1	1	1	1	1	0	1	0	0	0	1	1	1	0	1	1	1	0	0	1	0	1	0	0	0	0	1	1	0	1	1	1	0	0	1	0	1	0	1	0	0
-0.547777	-0.836625	1	0	1	1	1	0	1	1	1	1	u	1	1	1	1	0	1	1	1	0	1	1	1	0	1	1	1	1	1	1	1	1	1	1	1	1	0	1	1	1	1	0	1	1	1	1	1	1
-0.121454	-0.992597	1	0	1	1	1	0	u	1	1	1	0	1	1	1	1	0	1	1	1	0	1	1	1	0	1	1	0	0	1	0	1	1	0	1	0	1	0	1	1	0	1	0	1	0	1	1	1	1
0.966882	0.255224	0	1	1	1	1	1	0	1	1	1	1	1	0	1	0	1	0	1	1	1	0	1	1	1	0	0	1	0	1	0	0	0	0	1	1	0	1	1	1	0	0	1	0	1	0	1	0	0
0.873332	-0.487125	0	1	1	1	1	1	0	1	1	1	1	1	0	1	0	0	0	1	1	1	1	1	1	1	1	1	0	0	1	0	0	0	0	1	1	0	1	1	1	0	0	u	0	0	u	1	0	0
0.796461	0.60469	0	1	1	u	1	1	0	0	0	u	1	0	0	0	0	1	0	0	1	1	0	1	1	1	0	0	u	0	1	0	0	0	0	0	1	0	1	0	0	0	0	1	0	u	0	u	0	0
0.293713	-0.955894	0	0	1	1	1	0	0	1	u	1	0	1	0	1	0	0	0	1	0	0	1	1	1	0	1	1	0	0	0	0	0	1	0	1	0	0	0	1	u	0	0	0	0	0	1	1	0	0
-0.260098	-0.965582	1	0	1	1	1	1	1	1	1	1	1	1	1	1	1	0	1	1	1	0	1	1	1	1	1	1	1	1	1	1	1	1	1	1	1	1	0	1	1	1	1	0	1	1	1	1	1	1
0.456864	-0.889537	0	0	1	1	1	1	0	1	0	1	0	1	0	1	0	0	0	1	0	0	1	1	1	u	1	1	0	0	0	0	0	u	0	1	0	0	0	1	u	0	0	0	0	0	1	1	0	0
0.736498	-0.676439	0	0	1	1	1	1	0	1	0	0	0	u	0	1	0	0	0	1	0	0	0	1	1	1	0	1	0	0	0	0	0	0	0	1	0	0	0	1	0	0	0	0	0	0	0	1	0	0
-0.299876	-0.953978	0	0	0	1	0	0	0	1	0	0	0	1	0	1	0	0	0	1	0	0	1	u	u	0	1	1	0	0	0	0	1	1	0	0	0	1	0	1	0	0	0	0	0	0	1	0	1	0
0.558057	0.829803	0	0	0	0	0	0	0	0	0	0	0	0	0	0	0	0	0	0	0	0	0	0	0	0	0	0	0	0	0	0	0	0	0	0	0	0	u	0	0	0	0	0	0	0	0	0	0	0
-0.280065	0.959981	1	1	0	0	0	1	1	0	u	0	1	0	1	0	1	1	1	0	1	1	0	0	0	1	0	0	1	1	1	1	1	0	1	0	1	1	1	0	0	1	1	1	1	1	0	0	1	1
0.45756	0.889179	1	1	1	1	1	1	1	1	1	1	1	1	1	1	1	1	1	u	1	1	1	1	1	1	1	0	1	1	1	1	1	0	1	1	1	1	1	1	1	1	1	1	1	1	0	1	1	1
-0.517132	-0.855906	u	0	0	1	u	0	0	1	1	0	0	1	1	1	1	0	1	1	0	0	1	1	1	0	1	1	0	0	0	0	1	1	0	1	0	1	0	1	1	0	1	0	1	0	1	u	1	1
0.77042	-0.637537	1	1	1	1	1	1	1	1	1	1	1	1	1	1	1	0	1	1	1	1	1	1	1	1	1	1	1	0	1	1	1	1	0	1	1	1	1	1	1	1	1	1	u	1	1	1	1	1
-0.77339	0.63393	1	1	0	0	0	0	1	0	1	0	1	0	1	0	1	1	1	0	0	1	1	0	0	0	1	0	1	1	0	1	1	1	1	0	1	1	1	0	0	1	1	1	1	1	1	0	1	1
0.958426	0.28534	0	1	1	1	1	1	1	1	1	1	1	1	0	1	0	1	0	1	1	1	0	1	1	1	0	0	1	0	1	u	0	0	0	1	1	0	1	1	1	0	u	1	0	1	0	1	0	0
-0.0591135	0.998251	0	u	0	0	0	0	0	0	0	0	0	0	0	0	0	1	0	0	0	0	0	0	0	0	0	0	0	0	0	0	0	0	0	0	0	0	u	0	0	0	0	u	0	0	0	0	0	0
0.987723	-0.156217	0	1	1	1	1	1	0	1	1	1	1	1	0	1	0	0	0	1	1	1	0	1	1	1	0	1	1	0	1	0	0	0	0	1	1	0	1	1	1	0	0	1	0	1	0	1	0	0
-0.0913557	0.995818	1	1	0	0	0	1	1	0	0	0	1	0	1	0	0	1	0	0	1	1	0	0	0	1	0	0	1	1	1	1	0	0	1	0	1	0	1	0	0	1	1	1	1	1	0	0	0	1
0.371263	0.928528	0	1	0	0	0	0	0	0	0	0	0	0	0	0	0	0	0	0	0	1	0	0	0	0	0	0	0	0	0	0	0	0	0	0	0	0	1	0	0	0	0	u	0	0	0	0	0	0
0.494008	-0.869457	0	0	1	1	1	1	0	1	1	1	0	1	0	1	0	0	0	1	0	0	1	1	1	1	1	1	0	0	1	0	0	u	0	1	0	0	0	1	1	0	0	0	0	0	1	1	0	0
0.178884	0.98387	0	1	0	0	0	1	0	0	0	0	1	0	0	0	0	1	0	0	0	1	0	0	0	1	0	0	1	1	0	u	0	0	1	0	u	0	1	0	0	u	0	1	0	1	0	0	0	0
-0.211352	0.97741	0	0	0	0	0	0	0	0	0	0	0	0	0	0	0	1	0	0	0	0	0	0	0	0	0	0	0	0	0	0	0	0	0	0	0	0	0	0	0	0	0	0	0	0	0	0	0	0
-0.989887	0.141857	1	0	0	0	0	0	1	0	u	0	0	0	1	0	1	1	1	0	0	0	1	0	0	0	1	0	1	1	0	1	1	1	1	0	u	1	0	0	0	1	1	0	1	1	1	0	1	1
-0.774497	-0.632577	1	0	0	1	0	0	1	1	1	u	0	1	1	1	1	0	1	1	0	0	1	u	u	0	1	1	u	1	0	1	1	1	1	1	0	1	0	1	1	1	1	0	1	u	1	1	1	1
-0.41113	0.911577	1	1	1	1	1	1	1	1	1	1	1	1	1	u	1	1	1	1	1	1	1	1	1	1	1	1	1	1	1	1	1	1	1	1	1	1	1	1	1	1	1	1	1	1	1	1	1	1
-0.647043	0.762454	1	0	0	0	0	0	u	0	0	0	0	0	u	0	0	1	0	0	0	0	0	0	0	0	0	0	0	1	0	1	0	0	1	0	0	0	0	0	0	1	0	0	1	0	0	0	0	0
0.155116	-0.987896	0	0	1	1	1	0	0	1	0	0	0	1	0	1	0	0	0	1	0	0	1	1	1	0	1	1	0	0	0	0	0	1	0	1	0	0	0	1	u	0	0	0	0	0	1	1	0	0
-0.981233	-0.192825	1	0	0	0	0	0	1	1	1	0	u	1	1	0	1	1	1	1	0	0	1	0	0	0	1	1	1	1	0	1	1	1	1	u	1	1	0	1	1	1	1	0	1	1	1	0	1	1
-0.19926	0.979947	1	1	0	0	0	0	1	0	0	0	1	0	1	0	0	1	0	0	0	1	0	0	0	u	0	0	1	1	0	1	0	0	1	0	1	0	1	0	0	1	0	1	1	1	0	0	0	1
0.877079	-0.480346	0	0	1	1	1	1	0	1	0	1	0	1	0	1	0	0	0	1	1	0	0	1	1	1	0	1	0	0	1	0	0	0	0	1	0	0	0	1	u	0	0	0	0	0	0	1	0	0
-0.401132	0.91602	1	1	0	0	0	u	1	0	u	0	1	0	1	0	1	1	1	0	1	1	0	0	0	1	0	0	1	1	1	1	1	0	1	0	1	1	1	0	0	1	1	1	1	1	0	0	1	1
0.99895	0.045821	0	1	1	1	1	1	1	1	1	1	1	1	0	1	0	1	0	1	1	1	0	1	1	1	0	1	1	0	1	1	0	0	0	1	1	0	1	1	1	u	1	1	0	1	0	1	0	1
0.773691	0.633564	1	1	1	1	1	1	1	1	1	1	1	1	1	1	1	1	1	1	1	1	0	1	1	1	0	u	1	1	1	1	0	0	1	1	1	0	1	1	1	1	1	1	0	1	0	1	0	1
-0.996541	0.0830969	1	0	0	0	0	0	1	0	1	0	0	u	1	0	1	1	1	0	0	0	1	0	0	0	1	1	1	1	0	1	1	1	1	0	u	1	0	0	u	1	1	0	1	1	1	0	1	1
0.942346	-0.334639	0	1	1	1	1	1	0	1	1	1	1	1	0	1	0	0	0	1	1	1	0	1	1	1	0	1	0	0	1	0	0	0	0	1	1	0	1	1	1	0	0	1	0	0	0	1	0	0
0.895517	-0.445027	0	0	1	1	1	1	0	1	0	0	0	0	0	1	0	0	0	u	0	0	0	1	1	1	0	0	0	0	0	0	0	0	0	1	0	0	0	1	0	0	0	0	0	0	0	1	0	0
-0.356607	-0.934255	1	0	1	1	1	0	1	1	1	1	0	1	1	1	1	0	1	1	0	0	1	1	1	0	1	1	0	0	0	0	1	1	0	1	0	1	0	1	1	0	1	0	1	0	1	1	1	1
-0.577747	0.816216	0	0	0	0	0	0	0	0	0	0	0	0	0	0	0	1	0	0	0	0	0	0	0	0	0	0	0	0	0	0	0	0	1	0	0	0	0	0	0	0	0	0	0	0	0	0	0	0
0.612523	0.790453	1	1	1	1	1	1	1	0	1	1	1	u	1	1	0	1	u	0	1	1	0	1	1	1	0	0	1	1	1	1	0	0	1	1	1	0	1	0	1	1	1	1	0	1	0	1	0	1
0.0626573	-0.998035	0	0	0	0	0	0	0	0	0	0	0	0	0	0	0	0	0	1	0	0	0	0	0	0	0	1	0	0	0	0	0	0	0	0	0	0	0	u	0	0	0	0	0	0	0	0	0	0
0.0300094	-0.99955	0	0	1	1	1	0	0	1	1	1	0	1	0	1	u	0	u	1	0	0	1	1	1	0	1	1	0	0	0	0	1	1	0	1	0	1	0	1	1	0	0	0	0	0	1	1	1	0
-0.982346	-0.187073	1	0	0	0	0	0	1	0	0	0	0	0	1	0	1	u	1	0	0	0	1	0	0	0	1	1	0	1	0	1	1	1	1	0	0	1	0	0	0	1	1	0	1	0	1	0	1	1
0.214003	0.976833	1	1	1	1	1	1	1	1	1	1	1	1	1	1	1	1	1	0	1	1	1	1	1	1	1	0	1	1	1	1	1	u	1	1	1	1	1	u	1	1	1	1	1	1	0	1	1	1
0.712731	0.701437	0	1	0	0	0	1	0	0	0	0	0	0	0	0	0	0	0	0	0	1	0	0	0	1	0	0	0	0	0	0	0	0	0	0	0	0	1	0	0	0	0	0	0	0	0	0	0	0
-0.198869	-0.980026	0	0	u	1	u	0	0	1	0	0	0	1	0	1	0	0	0	1	0	0	1	1	1	0	1	1	0	0	0	0	1	1	0	1	0	1	0	1	0	0	0	0	0	0	1	0	1	0
-0.0989274	0.995095	1	1	0	0	0	0	1	0	0	0	1	0	0	0	0	1	0	0	0	1	0	0	0	0	0	0	1	1	0	1	0	0	1	0	u	0	1	0	0	1	0	1	0	1	0	0	0	0
-0.913013	0.407931	1	1	0	0	0	0	1	0	1	1	1	1	1	0	1	1	1	1	1	1	1	0	0	0	1	1	1	1	1	1	1	1	1	u	1	1	1	0	1	1	1	1	1	1	1	0	1	1
-0.274998	-0.961445	0	0	1	1	1	0	0	1	u	0	0	1	0	1	1	0	1	1	0	0	1	1	1	0	1	1	0	0	0	0	1	1	0	1	0	1	0	1	u	0	0	0	1	0	1	1	1	0
0.134058	0.990973	0	0	0	0	0	0	0	0	0	0	0	0	0	0	0	u	0	0	0	0	0	0	0	0	0	0	0	0	0	0	0	0	0	0	0	0	0	0	0	0	0	0	0	0	0	0	0	0
0.397789	-0.917477	0	0	1	1	1	1	0	1	1	1	0	1	0	1	1	0	1	1	1	0	1	1	1	1	1	1	0	0	1	0	1	1	0	1	u	1	0	1	1	0	1	0	0	0	1	1	1	u
0.701276	-0.71289	0	0	1	1	1	0	0	1	0	0	0	0	0	1	0	0	0	1	0	0	0	1	1	0	0	1	0	0	0	0	0	0	0	u	0	0	0	1	0	0	0	0	0	0	0	u	0	0
0.902045	0.431642	0	1	1	1	1	1	0	0	0	1	1	0	0	1	0	1	0	0	1	1	0	1	1	1	0	0	1	0	1	0	0	0	0	1	1	0	1	0	0	0	0	1	0	1	0	1	0	0
0.310529	-0.950564	0	0	1	1	1	1	0	1	1	1	0	1	u	1	1	0	1	1	1	0	1	1	1	1	1	1	0	0	1	0	1	1	0	1	u	1	0	1	1	0	1	0	1	0	1	1	1	1
0.918181	-0.396162	0	1	1	1	1	1	0	1	1	1	1	1	0	1	0	0	0	1	1	1	1	1	1	1	1	1	u	0	1	0	0	0	0	1	1	0	1	1	1	0	0	1	0	0	0	1	0	0
-0.977519	0.210847	1	1	0	0	0	0	1	1	1	1	1	1	1	0	1	1	1	1	1	1	1	0	0	0	1	1	1	1	1	1	1	1	1	1	1	1	1	1	1	1	1	1	1	1	1	1	1	1
0.425338	-0.905035	0	0	1	1	1	0	0	1	0	u	0	1	0	1	0	0	0	1	0	0	1	1	1	0	1	1	0	0	0	0	0	0	0	1	0	0	0	1	u	0	0	0	0	0	1	1	0	0
0.0377127	0.999289	0	0	0	0	0	0	0	0	0	0	0	0	0	0	0	1	0	0	0	0	0	0	0	0	0	0	0	0	0	0	0	0	0	0	0	0	0	0	0	0	0	0	0	0	0	0	0	0
0.988016	-0.154353	0	u	1	1	1	1	0	1	0	1	0	0	0	1	0	0	0	1	1	1	0	1	1	1	0	0	0	0	1	0	0	0	0	1	0	0	1	1	0	0	0	0	0	0	0	1	0	0
-0.862699	0.505719	1	1	0	0	0	0	1	u	1	1	1	1	1	0	1	1	1	1	1	1	1	0	0	0	1	1	1	1	1	1	1	1	1	1	1	1	1	u	1	1	1	1	1	1	1	1	1	1
-0.961499	-0.274808	0	0	0	0	0	0	0	0	0	0	0	0	0	0	0	0	0	0	0	0	0	0	0	0	0	0	0	0	0	0	u	1	0	0	0	u	0	0	0	0	0	0	0	0	u	0	0	0
-0.835566	0.54939	1	1	0	0	0	0	1	0	0	0	1	0	1	0	1	1	1	0	0	0	1	0	0	0	u	0	1	1	0	1	1	1	1	0	1	1	0	0	0	1	1	1	1	1	1	0	1	1
-0.263466	-0.964669	1	0	1	1	1	0	0	1	1	1	0	1	1	1	1	0	1	1	0	0	1	1	1	0	1	1	0	0	0	0	1	1	0	1	0	1	0	1	1	0	1	0	1	0	1	1	1	1
-0.297872	0.954606	1	1	0	0	0	0	1	0	0	0	1	0	1	0	1	1	1	0	u	1	0	0	0	u	0	0	1	1	0	1	u	0	1	0	1	1	1	0	0	1	1	1	1	1	0	0	0	1
-0.751	0.660303	1	1	0	0	0	0	1	0	0	0	1	0	1	0	1	1	1	0	0	1	1	0	0	0	u	0	1	1	0	1	1	1	1	0	1	1	1	0	0	1	1	1	1	1	1	0	1	1
-0.700163	0.713983	1	1	0	0	0	1	1	0	1	1	1	1	1	0	1	1	1	0	1	1	1	0	0	1	1	u	1	1	1	1	1	1	1	u	1	1	1	0	1	1	1	1	1	1	1	1	1	1
-0.284199	-0.958765	1	0	1	1	1	u	1	1	1	1	1	1	1	1	1	0	1	1	1	0	1	1	1	0	1	1	1	1	1	1	1	1	1	1	1	1	0	1	1	1	1	0	1	1	1	1	1	1
0.979918	0.199402	u	1	1	1	1	1	1	1	1	1	1	1	1	1	0	1	1	1	1	1	0	1	1	1	u	1	1	1	1	1	0	0	1	1	1	0	1	1	1	1	1	1	0	1	0	1	0	1
-0.563817	0.8259	1	1	0	0	0	0	1	0	0	0	1	0	1	0	1	1	u	0	0	1	0	0	0	0	0	0	1	1	0	1	1	0	1	0	1	1	1	0	0	1	1	1	1	1	0	0	1	1
-0.844589	0.535415	1	0	0	0	0	0	u	0	0	0	0	0	1	0	u	1	0	0	0	0	0	0	0	0	0	0	0	1	0	1	1	u	1	0	0	1	0	0	0	1	0	0	1	0	0	0	1	0
0.919079	-0.394074	1	1	1	1	1	1	1	1	1	1	1	1	1	1	1	1	1	1	1	1	1	1	1	1	1	1	1	0	1	1	1	1	0	1	1	u	1	1	1	1	1	1	0	1	1	1	1	1
0.763075	0.64631	1	1	1	1	1	1	1	1	1	1	1	1	1	1	1	1	1	1	1	1	1	1	1	1	1	1	1	1	1	1	0	0	1	1	1	0	1	1	1	1	1	1	1	1	0	1	u	1
0.489683	0.871901	1	1	1	1	1	1	1	0	1	1	1	0	1	u	0	1	1	0	1	1	0	1	1	1	0	0	1	1	1	1	0	0	1	1	1	0	1	0	1	1	1	1	0	1	0	1	0	1
0.0557699	-0.998444	0	0	0	0	0	0	0	1	0	0	0	0	0	1	0	0	0	1	0	0	0	u	0	0	0	1	0	0	0	0	0	0	0	0	0	0	0	1	0	0	0	0	0	0	1	0	0	0
-0.881132	-0.47287	1	0	0	1	u	0	1	1	1	1	1	1	1	1	1	1	1	1	1	0	1	1	1	0	1	1	1	1	u	1	1	1	1	1	1	1	0	1	1	1	1	0	1	1	1	1	1	1
0.24709	-0.968993	0	0	1	1	1	0	0	1	0	0	0	1	0	1	0	0	0	1	0	0	0	1	1	0	0	1	0	0	0	0	0	0	0	u	0	0	0	1	0	0	0	0	0	0	1	0	0	0
-0.604718	0.79644	1	1	0	0	0	1	1	1	1	1	1	1	1	0	1	1	1	u	1	1	1	0	0	1	1	1	1	1	1	1	1	1	1	1	1	1	1	0	1	1	1	1	1	1	1	1	1	1
-0.775523	0.63132	u	0	0	0	0	0	0	0	0	0	0	0	0	0	0	1	0	0	0	0	0	0	0	0	0	0	0	1	0	u	0	0	1	0	0	u	0	0	0	1	0	0	1	0	0	0	0	0
0.462826	-0.886449	0	0	1	1	1	0	0	1	0	0	0	u	0	1	0	0	0	1	0	0	0	1	1	0	0	1	0	0	0	0	0	0	0	1	0	0	0	1	0	0	0	0	0	0	0	u	0	0
-0.835208	0.549934	1	0	0	0	0	0	1	0	0	0	0	0	1	0	1	1	0	0	0	0	0	0	0	0	0	0	0	1	0	1	1	u	1	0	0	1	0	0	0	1	0	0	1	u	0	0	1	0
-0.313539	-0.949575	0	0	u	1	u	0	0	1	0	0	0	1	0	1	1	0	1	1	0	0	1	1	1	0	1	1	0	0	0	0	1	1	0	1	0	1	0	1	0	0	0	0	1	0	1	0	1	0
-0.730062	-0.683381	1	1	1	1	1	0	1	1	1	1	1	1	1	1	1	1	1	1	1	u	1	1	1	0	1	1	1	1	1	1	1	1	1	1	1	1	0	1	1	1	1	1	1	1	1	1	1	1
-0.932669	0.360732	1	1	0	0	0	0	1	1	1	1	1	1	1	0	1	1	1	1	1	1	1	0	0	u	1	1	1	1	1	1	1	1	1	1	1	1	1	1	1	1	1	1	1	1	1	1	1	1
-0.65816	-0.752878	1	0	1	1	1	0	1	1	1	1	1	1	1	1	1	1	1	1	1	0	1	1	1	0	1	1	1	1	1	1	1	1	1	1	1	1	0	1	1	1	1	0	1	1	1	1	1	1
-0.981772	0.190062	u	0	0	0	0	0	0	0	0	0	0	0	0	0	0	0	0	0	0	0	0	0	0	0	0	0	0	1	0	0	1	1	1	0	0	1	0	0	0	0	0	0	1	0	0	0	1	0
-0.54094	0.841061	1	1	0	0	0	0	1	0	1	0	1	0	1	0	1	1	1	0	1	1	u	0	0	0	0	0	1	1	1	1	1	1	1	0	1	1	1	0	u	1	1	1	1	1	0	0	1	1
0.97681	-0.214106	0	0	u	0	0	u	0	0	0	0	0	0	0	0	0	0	0	0	0	0	0	u	0	0	0	0	0	0	0	0	0	0	0	0	0	0	0	0	0	0	0	0	0	0	0	0	0	0
0.773742	0.633501	1	1	1	1	1	1	1	1	1	1	1	1	1	1	0	1	u	0	1	1	0	1	1	1	0	0	1	1	1	1	0	0	1	1	1	0	1	1	1	1	1	1	0	1	0	1	0	1
-0.968992	-0.247091	0	0	0	0	0	0	0	0	0	0	0	0	0	0	1	0	0	0	0	0	u	0	0	0	u	0	0	0	0	0	1	1	0	0	0	1	0	0	0	0	0	0	1	0	1	0	1	0
0.381354	0.924429	0	1	0	0	0	1	1	0	0	0	1	0	0	0	0	1	0	0	1	1	0	0	0	1	0	0	1	1	1	1	0	0	1	0	1	0	1	0	0	1	0	1	0	1	0	0	0	0
-0.992778	-0.119965	1	0	0	0	0	0	0	0	0	0	0	0	1	0	1	0	1	0	0	0	1	0	0	0	1	0	0	1	0	u	1	1	1	0	0	1	0	0	0	1	0	0	1	0	1	0	1	u
0.734092	-0.67905	0	0	1	u	u	0	0	0	0	0	0	0	0	1	0	0	0	0	0	0	0	1	1	0	0	0	0	0	0	0	0	0	0	0	0	0	0	0	0	0	0	0	0	0	0	0	0	0
-0.0385645	0.999256	1	1	1	1	1	1	1	1	1	1	1	1	1	1	1	1	1	u	1	1	1	1	1	1	1	0	1	1	1	1	1	1	1	1	1	1	1	u	1	1	1	1	1	1	1	1	1	1
0.959366	-0.282165	1	1	1	1	1	1	1	1	1	1	1	1	1	1	1	1	1	1	1	1	1	1	1	1	1	1	1	u	1	1	0	u	0	1	1	0	1	1	1	1	1	1	0	1	1	1	1	1
-0.1107	0.993854	1	1	0	0	0	1	1	0	1	1	1	0	1	0	1	1	1	0	1	1	0	0	0	1	0	0	1	1	1	1	1	0	1	0	1	1	1	0	1	1	1	1	1	1	0	0	1	1
0.143146	-0.989702	1	1	1	1	1	1	1	1	1	1	1	1	1	1	1	u	1	1	1	1	1	1	1	1	1	1	1	1	1	1	1	1	1	1	1	1	1	1	1	1	1	1	1	1	1	1	1	1
-0.983331	-0.181827	0	0	0	0	0	0	0	0	0	0	0	0	0	0	0	0	0	0	0	0	0	0	0	0	0	0	0	0	0	0	1	1	0	0	0	1	0	0	0	0	0	0	1	0	1	0	u	0
0.999373	-0.0354055	0	1	1	1	1	1	0	1	0	1	0	0	0	1	0	0	0	0	1	1	0	1	1	1	0	0	0	0	1	0	0	0	0	1	0	0	1	1	0	0	0	u	0	0	0	1	0	0
-0.479545	0.877517	1	1	0	0	0	1	1	0	1	1	1	1	1	0	1	1	1	0	1	1	1	0	0	1	1	0	1	1	1	1	1	1	1	u	1	1	1	0	1	1	1	1	1	1	1	1	1	1
0.967455	0.253043	0	1	1	1	1	1	0	1	u	1	1	0	0	1	0	0	0	0	1	1	0	1	1	1	0	0	1	0	1	0	0	0	0	1	1	0	1	1	1	0	0	1	0	1	0	1	0	0
0.284158	0.958777	1	1	0	0	0	1	1	0	0	u	1	0	1	0	0	1	0	0	1	1	0	0	0	1	0	0	1	1	1	1	0	0	1	0	1	0	1	0	0	1	u	1	0	1	0	0	0	1
-0.975846	0.218459	0	0	0	0	0	0	0	0	0	0	0	0	0	0	0	0	0	0	0	0	0	0	0	0	0	0	0	0	0	0	u	u	0	0	0	1	0	0	0	0	0	0	1	0	0	0	0	0
0.927999	-0.372583	1	1	1	1	1	1	1	1	1	1	1	1	1	1	1	1	1	1	1	1	1	1	1	1	1	1	1	1	1	1	1	1	1	1	1	1	1	1	1	1	1	1	u	1	1	1	1	1
0.540564	0.841303	0	1	0	0	0	1	0	0	0	0	1	0	0	0	0	1	0	0	1	1	0	0	0	1	0	0	1	u	1	1	0	0	1	0	1	0	1	0	0	u	0	1	0	1	0	0	0	0
0.999934	0.0115177	0	1	1	1	1	1	0	u	0	1	0	0	0	1	0	0	0	0	1	1	0	1	1	1	0	0	0	0	1	0	0	0	0	1	0	0	1	0	0	0	0	0	0	0	0	1	0	0
-0.884875	0.465829	1	1	0	1	u	1	1	1	1	1	1	1	1	0	1	1	1	1	1	1	1	0	u	1	1	1	1	1	1	1	1	1	1	1	1	1	1	1	1	1	1	1	1	1	1	1	1	1
0.816754	-0.576986	0	0	u	0	0	0	0	0	0	0	0	0	0	1	0	0	0	0	0	0	0	1	u	0	0	0	0	0	0	0	0	0	0	0	0	0	0	0	0	0	0	0	0	0	0	0	0	0
0.501229	-0.865315	0	0	1	1	1	1	0	1	1	1	u	1	0	1	1	0	1	1	1	0	1	1	1	1	1	1	0	0	1	0	1	1	0	1	1	1	0	1	1	0	1	0	0	0	1	1	1	1
0.725074	0.68867	1	1	1	1	1	1	1	1	1	1	1	1	1	1	1	1	1	1	1	1	1	1	1	1	1	1	1	1	1	1	u	0	1	1	1	1	1	1	1	1	1	1	1	1	0	1	1	1
0.908914	-0.416983	0	u	1	1	1	1	0	1	1	1	1	1	0	1	0	0	0	1	1	1	0	1	1	1	0	1	0	0	1	0	0	0	0	1	1	0	1	1	1	0	0	0	0	0	0	1	0	0
0.998785	0.0492702	0	1	1	1	1	1	0	1	1	1	1	1	0	1	0	0	0	1	1	1	0	1	1	1	0	0	u	0	1	0	0	0	0	1	1	0	1	1	1	0	0	1	0	u	0	1	0	0
0.461122	-0.887337	0	0	1	1	1	0	0	1	0	0	0	0	0	1	0	0	0	1	0	0	0	1	1	0	0	1	0	0	0	0	0	0	0	u	0	0	0	1	0	0	0	0	0	0	0	0	0	0
[truncated: 55 more columns]
